# Supplementary material for: Cross-dehydrogenative coupling reaction using copper oxide impregnated on magnetite in deep eutectic solvents
Source: Royal Society of Chemistry journal article supplement (doi:10.1039/c5gc01745a), 2015-09-09

Supporting Information for

**Cross-Dehydrogenative Coupling Reaction using Copper Oxide  
Impregnated on Magnetite in Deep Eutectic Solvents**

*Xavier Maset, Juana M. Pérez and Diego J. Ramón\**

*Instituto de Síntesis Orgánica (ISO) and Departamento de Química Orgánica, Facultad  
de Ciencias, Universidad de Alicante, Apdo. 99, E-03080-Alicante, Spain*

[djramon@ua.es](mailto:djramon@ua.es)

**Table of Contents**

|                                                          |    |
|----------------------------------------------------------|----|
| <b>I. TEM images of catalyst</b>                         | S2 |
| <b>II. Auger Electron Spectroscopy</b>                   | S2 |
| <b>III. Characterization data</b>                        | S3 |
| <b>IV. References</b>                                    | S8 |
| <b>V. Copies of <sup>1</sup>H and <sup>13</sup>C-NMR</b> | S9 |

## I. TEM images of catalyst

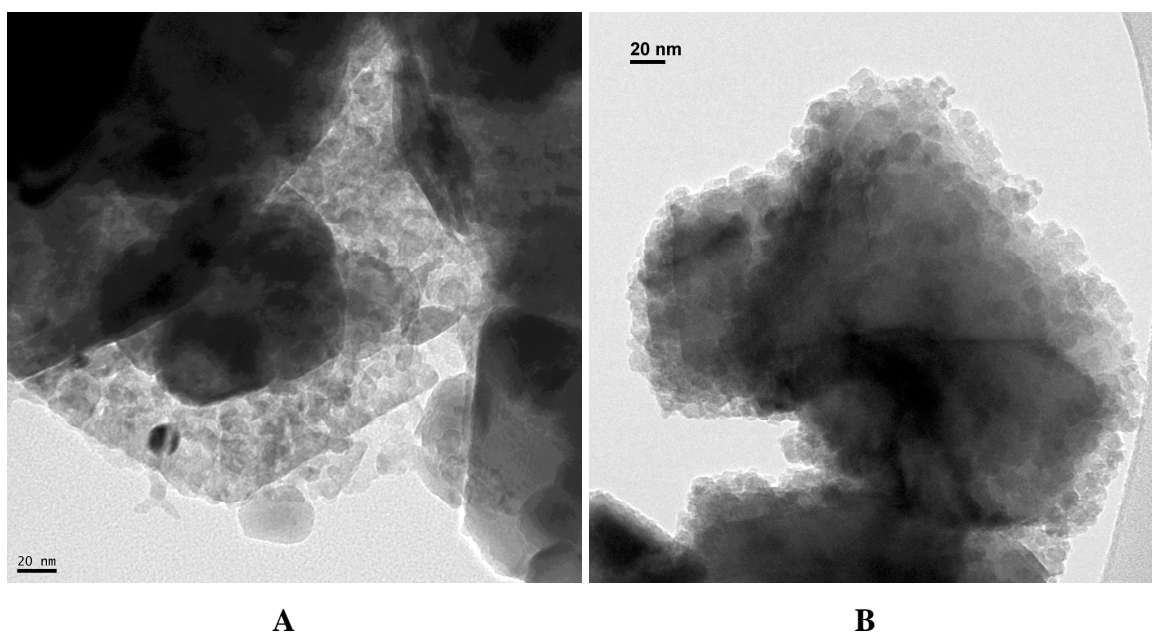

**Image 1.** TEM images of CuO-Fe<sub>3</sub>O<sub>4</sub> catalyst before (A) and after (B) carrying out the reaction

## II. Auger Electron Spectroscopy

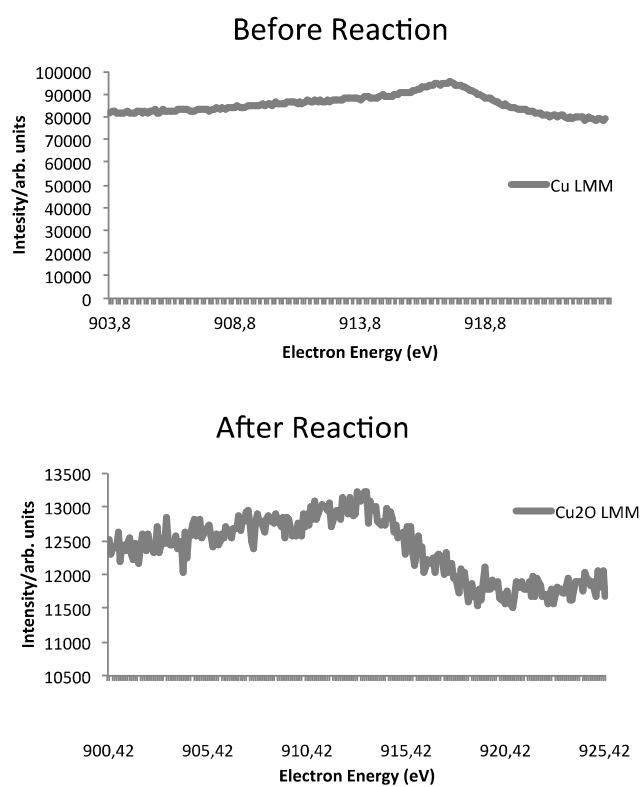

**Image 2.** Auger Electron Spectroscopy (AES) studies for catalyst before and after reaction was carried out.

### III. Characterization data

**2-(4-fluorophenyl)-1,2,3,4-tetrahydroisoquinoline (1a):**<sup>1</sup> White solid; m.p. = 69-71 °C (ethanol);  $t_r$  = 15.3;  $R_f$  = 0.6 (hexane/ethyl acetate: 4/1). <sup>1</sup>H NMR (300 MHz, CDCl<sub>3</sub>):  $\delta$  7.2-7.1 (m, 4H, ArH), 6.9-7.0 (m, 4H, ArH), 4.33 (s, 2H, ArCH<sub>2</sub>N), 3.48 (t,  $J$  = 5.9 Hz, 2H, CH<sub>2</sub>CH<sub>2</sub>N), 2.98 (t,  $J$  = 5.9 Hz, 2H, CH<sub>2</sub>CH<sub>2</sub>N). <sup>13</sup>C NMR (75 MHz, CDCl<sub>3</sub>):  $\delta$  156.7 (d,  $J$  = 238.0 Hz), 147.4 (d,  $J$  = 1.5 Hz), 134.5, 134.3, 128.6, 126.5, 126.4, 126.0, 117.1 (d,  $J$  = 7.5 Hz, 2C), 115.5 (d,  $J$  = 22.0 Hz, 2C), 51.9, 47.8, 29.0. IR (ATR):  $\nu$  1505, 1205 cm<sup>-1</sup>. MS (EI)  $m/z$  (%): 228 (M<sup>+</sup>+1, 14), 227 (M<sup>+</sup>, 95), 226 (100), 104 (72), 103 (15), 95 (12), 78 (12).

**2-phenyl-1,2,3,4-tetrahydroisoquinoline (1b):**<sup>2</sup> Pale yellow solid; m.p. = 45-47 °C (ethanol);  $t_r$  = 15.4;  $R_f$  = 0.8 (hexane/ethyl acetate : 4/1). <sup>1</sup>H NMR (300 MHz, CDCl<sub>3</sub>):  $\delta$  7.3-7.25 (m, 2H, ArH), 7.2-7.1 (m, 4H, ArH), 6.96 (d,  $J$  = 8.0 Hz, 2H, ArH), 6.82 (t,  $J$  = 7.3 Hz, 1H, ArH), 4.39 (s, 2H, ArCH<sub>2</sub>N), 3.53 (t,  $J$  = 5.8 Hz, 2H, CH<sub>2</sub>CH<sub>2</sub>N), 2.96 (t,  $J$  = 5.8 Hz, 2H, CH<sub>2</sub>CH<sub>2</sub>N). <sup>13</sup>C NMR (75 MHz, CDCl<sub>3</sub>):  $\delta$  150.5, 134.8, 134.4, 130.2 (2C), 129.2, 126.5, 126.3, 126.0, 118.6, 115.1 (2C), 50.7, 46.5, 29.1. IR (ATR):  $\nu$  3058, 3023, 1598, 1500, 1386 cm<sup>-1</sup>. MS (EI)  $m/z$  (%): 210 (M<sup>+</sup>+1, 10), 209 (M<sup>+</sup>, 82), 208 (M<sup>+</sup>-1, 100), 104 (56), 78 (10), 77 (17).

**2-(4-methoxyphenyl)-1,2,3,4-tetrahydroisoquinoline (1c):**<sup>3</sup> Pale orange solid; m.p. 92-94 °C (ethanol);  $t_r$  = 18.56;  $R_f$  = 0.5 (hexane/ethyl acetate : 4/1). <sup>1</sup>H NMR (300 MHz, CDCl<sub>3</sub>):  $\delta$  7.2-7.1 (m, 4H, ArH), 7.0-6.95 (m, 2H, ArH), 6.9-6.8 (m, 2H, ArH), 4.29 (s, 2H, ArCH<sub>2</sub>N), 3.77 (s, 3H, OCH<sub>3</sub>), 3.44 (t,  $J$  = 5.8 Hz, 2H, CH<sub>2</sub>CH<sub>2</sub>N), 2.98 (t,  $J$  = 5.8 Hz, 2H, CH<sub>2</sub>CH<sub>2</sub>N). <sup>13</sup>C NMR (75 MHz, CDCl<sub>3</sub>):  $\delta$  153.6, 145.5, 134.7 (2C), 128.8, 126.6, 126.4, 126.0, 118.1 (2C), 114.7 (2C), 55.8, 52.8, 48.6, 29.2. IR (ATR):  $\nu$  2808, 1509, 1239, 1036 cm<sup>-1</sup>. MS (EI)  $m/z$  (%): 240 (M<sup>+</sup>+1, 16), 239 (M<sup>+</sup>, 100), 238 (M<sup>+</sup>-1, 93), 224 (22), 135 (27), 120 (20), 104 (24).

**2-tosyl-1,2,3,4-tetrahydroisoquinoline (1d):**<sup>4</sup> Pale yellow solid; m.p. 132-134 °C (ethanol);  $t_r$  = 15.63;  $R_f$  = 0.4 (hexane/ethyl acetate : 4/1). <sup>1</sup>H NMR (300 MHz, CDCl<sub>3</sub>):  $\delta$  7.75-7.7 (m, 2H, ArH), 7.4-7.3 (m, 2H, ArH), 7.14 (dd,  $J$  = 5.6, 3.5 Hz, 2H, ArH), 7.1-7.0 (m, 2H, ArH), 4.24 (s, 2H, ArCH<sub>2</sub>N), 3.35 (t,  $J$  = 5.9 Hz, 2H, CH<sub>2</sub>CH<sub>2</sub>N), 2.93 (t,  $J$  = 5.9 Hz, 2H, CH<sub>2</sub>CH<sub>2</sub>N), 2.42 (s, 3H, Ar-CH<sub>3</sub>). <sup>13</sup>C NMR (75 MHz, CDCl<sub>3</sub>):  $\delta$  143.8, 133.3, 133.1, 131.7, 129.8 (2C), 129.0, 128.9, 127.8 (2C), 126.8, 126.4, 47.6, 43.8, 28.9, 21.6. IR (ATR):  $\nu$  3064, 1489, 1338, 1163 cm<sup>-1</sup>. MS (EI)  $m/z$  (%): 287 (M<sup>+</sup>, 5), 286 (M<sup>+</sup>-1, 14), 132 (100), 131 (29), 130 (32), 105 (26), 104 (53), 103 (15), 91 (29), 77 (16).

**2-(4-fluorophenyl)-1-(phenylethynyl)-1,2,3,4-tetrahydroisoquinoline (3a).** Brown oil;  $t_r$  = 21.03;  $R_f$  = 0.6 (hexane/ethyl acetate : 4/1). <sup>1</sup>H NMR (300 MHz, CDCl<sub>3</sub>):  $\delta$  7.4-7.35 (m, 1H, ArH), 7.3-7.2 (m, 8H, ArH), 7.1-7.05 (m, 2H, ArH), 7.05-7.0 (m, 2H, ArH), 5.54 (s, 1H, ArCHN), 3.65-3.6 (m, 2H, CH<sub>2</sub>CH<sub>2</sub>N), 3.2-3.1 (m, 1H, CHHCH<sub>2</sub>N), 2.96 (dt,  $J$  = 16.3, 3.6 Hz, 1H, CHHCH<sub>2</sub>N). <sup>13</sup>C NMR (75 MHz, CDCl<sub>3</sub>):  $\delta$  157.4 (d,  $J$  = 239.3 Hz), 146.4, 135.1, 134.0, 131.7 (2C), 129.0, 128.1 (3C), 127.4, 127.2, 126.2, 122.8, 119.4 (d,  $J$  = 7.7 Hz, 2C), 115.5 (d,  $J$  = 22.2 Hz, 2C), 88.1, 85.3, 53.7, 44.0, 29.0. IR (ATR):  $\nu$  3056, 3026, 1506, 1489 cm<sup>-1</sup>. MS (EI)  $m/z$  (%): 328

( $M^+ + 1$ , 9), 327 ( $M^+$ , 50), 326 ( $M^+ - 1$ , 100), 222 (10), 207 (14), 204 (27), 203 (33), 202 (36), 102 (22). HRMS calcd. (%) for  $C_{23}H_{18}FN$ : 327.1423; found: 327.1412.

**2-phenyl-1-(phenylethynyl)-1,2,3,4-tetrahydroisoquinoline (3b):**<sup>2</sup> Yellow oil;  $t_r = 21.37$ ;  $R_f = 0.6$  (hexane/ethyl acetate : 4/1).  $^1H$  NMR (300 MHz,  $CDCl_3$ ):  $\delta$  7.4-7.35 (m, 1H, ArH), 7.35-7.25 (m, 4H, ArH), 7.25-7.2 (m, 6H, ArH), 7.12 (dd,  $J = 8.7$ , 0.9 Hz, 2H, ArH), 6.88 (dd,  $J = 7.7$ , 6.8 Hz, 1H, ArH), 5.64 (s, 1H, ArCHN), 3.8-3.9 (m, 1H,  $CH_2CHHN$ ), 3.67 (ddd,  $J = 12.4$ , 10.2, 4.0 Hz, 1H,  $CH_2CHHN$ ), 3.14 (ddd,  $J = 16.1$ , 10.2, 6.1 Hz, 1H,  $CHHCH_2N$ ), 2.97 (dt,  $J = 16.1$ , 4.0 Hz, 1H,  $CHHCH_2N$ ).  $^{13}C$  NMR (75 MHz,  $CDCl_3$ ):  $\delta$  149.5, 135.4, 134.4, 131.7 (2C), 129.1 (2C), 128.9, 128.0 (2C), 128.0, 127.4, 127.2, 126.2, 123.0, 119.6, 116.7 (2C), 88.6, 84.7, 52.3, 43.4, 28.9. IR (ATR):  $\nu$  3059, 3024, 1596, 1501, 1490  $cm^{-1}$ . MS (EI)  $m/z$  (%): 310 ( $M^+ + 1$ , 13), 309 ( $M^+$ , 63), 308 (100), 204 (27), 203 (21), 202 (27), 77 (8).

**2-(4-methoxyphenyl)-1-(phenylethynyl)-1,2,3,4-tetrahydroisoquinoline (3c):**<sup>5</sup> Brown oil;  $t_r = 25.14$ ;  $R_f = 0.5$  (hexane/ethyl acetate : 4/1).  $^1H$  NMR (300 MHz,  $CDCl_3$ ):  $\delta$  7.35 (dd,  $J = 5.0$ , 3.9 Hz, 1H, ArH), 7.15-7.35 (m, 8H, ArH), 7.05-7.15 (m, 2H, ArH), 6.95-6.85 (m, 2H, ArH), 5.51 (s, 1H, ArCHN), 3.78 (s, 3H,  $OCH_3$ ), 3.45-3.70 (m, 2H,  $CH_2CH_2N$ ), 3.15 (ddd,  $J = 16.4$ , 6.2, 3.4 Hz, 1H,  $CHHCH_2N$ ), 2.93 (dt,  $J = 16.4$ , 3.4 Hz, 1H,  $CHHCH_2N$ ).  $^{13}C$  NMR (75 MHz,  $CDCl_3$ ):  $\delta$  154.3, 144.1, 135.4, 134.0, 131.7 (2C), 129.0, 128.0 (2C), 127.9, 127.5, 127.1, 126.1, 123.1, 120.2 (2C), 114.4 (2C), 88.4, 85.5, 54.6, 54.4, 44.2, 29.0. IR (ATR):  $\nu$  1509, 1242, 1035  $cm^{-1}$ . MS (EI)  $m/z$  (%): 339 ( $M^+$ , 82), 338 ( $M^+ - 1$ , 100), 291 (29), 283 (35), 281 (51), 218 (28), 208 (47), 207 (95), 204 (31), 203 (33), 202 (31), 133 (28), 115 (28), 102 (40), 92 (31), 78 (33), 61 (36).

**2-(4-fluorophenyl)-1-((4-methoxyphenyl)ethynyl)-1,2,3,4-tetrahydroisoquinoline (3f).** Pale yellow oil;  $t_r = 26.42$ ;  $R_f = 0.4$  (hexane/ethyl acetate : 4/1).  $^1H$  NMR (300 MHz,  $CDCl_3$ ):  $\delta$  7.35-7.30 (m, 1H, ArH), 7.25-7.20 (m, 3H, ArH), 7.15-7.20 (m, 2H, ArH), 7.10-7.05 (m, 2H, ArH), 7.05-7.0 (m, 2H, ArH), 6.75-6.70 (m, 2H, ArH), 5.52 (s, 1H, ArCHN), 3.75 (s, 3H,  $OCH_3$ ), 3.65-3.55 (m, 2H,  $CH_2CH_2N$ ), 3.2-3.1 (m, 1H,  $CHHCH_2N$ ), 2.94 (dt,  $J = 16.2$ , 3.6 Hz,  $CHHCH_2N$ ).  $^{13}C$  NMR (75 MHz,  $CDCl_3$ ):  $\delta$  159.4, 157.4 (d,  $J = 238.8$  Hz), 146.4, 135.4, 133.9, 133.1 (2C), 128.9, 127.4, 127.2, 126.2, 115.4 (d,  $J = 22.1$  Hz, 2C), 114.9, 113.7 (2C), 86.6, 85.2, 55.2, 53.7, 44.0, 28.9. IR (ATR):  $\nu$  3050, 1604, 1506  $cm^{-1}$ . MS (EI)  $m/z$  (%): 357 ( $M^+$ , 82), 356 ( $M^+ - 1$ , 100), 283 (10), 208 (11), 207 (54), 191 (19), 190 (10), 189 (29), 133 (15), 73 (12), 65 (10). HRMS calcd. (%) for  $C_{24}H_{20}FNO$ : 357.1529; found: 357.1517.

**1-((4-bromophenyl)ethynyl)-2-(4-fluorophenyl)-1,2,3,4-tetrahydroisoquinoline (3g):** Brown oil;  $t_r = 26.5$ ;  $R_f = 0.6$  (hexane/ethyl acetate : 4/1).  $^1H$  NMR (300 MHz,  $CDCl_3$ ):  $\delta$  7.4-7.3 (m, 3H, ArH), 7.25-7.15 (m, 3H, ArH), 7.15-6.95 (m, 6H, ArH), 5.52 (s, 1H, ArCHN), 3.60 (dd,  $J = 8.6$ , 3.7 Hz, 2H,  $CH_2CH_2N$ ), 3.13 (dt,  $J = 16.3$ , 8.6 Hz, 1H,  $CHHCH_2N$ ), 2.95 (dt,  $J = 16.3$ , 3.7 Hz, 1H,  $CHHCH_2N$ ).  $^{13}C$  NMR (75 MHz,  $CDCl_3$ ):  $\delta$  157.6 (d,  $J = 239.3$  Hz), 146.6, 135.0, 134.1, 133.2, 131.5, 129.2, 127.5 (2C), 126.4, 122.4, 121.9, 119.5 (d,  $J = 7.7$  Hz, 2C), 115.7 (d,  $J = 22.2$  Hz, 2C), 49.5, 84.4, 53.9, 44.2, 29.1. IR (ATR):  $\nu$  3058, 3025, 1657, 1507  $cm^{-1}$ . MS (EI)  $m/z$  (%): 408 ( $M^+ + 2$ , 11), 407 ( $M^+ + 1$ , 54), 406 ( $M^+$ , 100), 404 ( $M^+ - 2$ , 94), 284 (26), 282 (27), 350 (15), 226 (10), 224 (25), 207 (10), 203 (23), 202 (83), 201 (16), 200 (12), 122 (15), 95 (17). HRMS calcd. (%) for  $(C_{23}H_{17}BrFN - H)$ : 404.0450; found: 404.0437.

**2-(4-fluorophenyl)-1-((4-(trifluoromethyl)phenyl)ethynyl)-1,2,3,4-tetrahydroisoquinoline (3h).** Orange oil,  $t_r = 20.23$ ;  $R_f = 0.5$  (hexane/ethyl acetate : 4/1).  $^1\text{H}$  NMR (300 MHz,  $\text{CDCl}_3$ ):  $\delta$  7.5-7.45 (m, 2H, ArH), 7.4-7.3 (m, 3H, ArH), 7.25-7.20 (m, 3H, ArH), 7.15-6.95 (m, 4H, ArH), 5.56 (s, 1H, ArCHN), 3.61 (dd,  $J = 8.5, 3.6$  Hz, 2H,  $\text{CH}_2\text{CH}_2\text{N}$ ), 3.2-3.1 (m, 1H,  $\text{CHHCH}_2\text{N}$ ), 2.96 (dt,  $J = 16.2, 3.6$  Hz, 1H,  $\text{CHHCH}_2\text{N}$ ).  $^{13}\text{C}$  NMR (75 MHz,  $\text{CDCl}_3$ ):  $\delta$  157.5 (d,  $J = 239.5$ ), 146.2, 134.6, 134.0, 131.9 (2C), 129.8 (q,  $J = 32.6$  Hz), 129.0, 127.4 (2C), 126.6, 126.3, 125.0 (q,  $J = 3.6$  Hz, 2C), 123.8 (q,  $J = 271.1$  Hz), 119.4 (d,  $J = 7.7$  Hz, 2C), 115.6 (d,  $J = 22.1$  Hz, 2C), 90.8, 84.0, 53.8, 44.0, 28.9. IR (ATR):  $\nu$  3065, 1614, 1507  $\text{cm}^{-1}$ . MS (EI)  $m/z$  (%): 396 ( $M^+ + 1$ , 12), 395 ( $M^+$ , 64), 394 ( $M^+ - 1$ , 100), 272 (46), 203 (10), 202 (31), 95 (12). HRMS calcd. (%) for  $\text{C}_{24}\text{H}_{17}\text{F}_4\text{N}$ : 395.1297; found: 395.1287.

**1-((3-chlorophenyl)ethynyl)-2-(4-fluorophenyl)-1,2,3,4-tetrahydroisoquinoline (3i):** Yellow oil;  $t_r = 23.6$ ;  $R_f = 0.7$  (hexane/ethyl acetate : 4/1).  $^1\text{H}$  NMR (300 MHz,  $\text{CDCl}_3$ ):  $\delta$  7.35-7.3 (m, 1H, ArH), 7.3-7.2 (m, 5H, ArH), 7.15-7.1 (m, 2H, ArH), 7.10-6.95 (m, 4H, ArH), 5.52 (s, 1H, ArCHN), 3.60 (dd,  $J = 8.3, 3.6$  Hz, 2H,  $\text{CH}_2\text{CH}_2\text{N}$ ), 3.2-3.05 (m, 1H,  $\text{CHHCH}_2\text{N}$ ), 2.95 (dt,  $J = 16.2, 3.4$  Hz, 1H,  $\text{CHHCH}_2\text{N}$ ).  $^{13}\text{C}$  NMR (75 MHz,  $\text{CDCl}_3$ ):  $\delta$  157.7 (d,  $J = 239.3$  Hz), 146.4, 134.9, 134.1 (2C), 131.7, 130.0, 129.5, 129.2, 128.5, 127.5 (2C), 126.5, 124.7, 119.5 (d,  $J = 7.6$  Hz, 2C), 115.7 (d,  $J = 22.2$  Hz, 2C), 89.6, 84.1, 53.8, 44.2, 29.1. IR (ATR):  $\nu$  3061, 2924, 2832, 1591, 1507  $\text{cm}^{-1}$ . MS (EI)  $m/z$  (%): 362 ( $M^+ + 1$ , 42), 361 ( $M^+$ , 67), 360 ( $M^+ - 1$ , 100), 238 (35), 208 (13), 207 (56), 203 (21), 202 (52), 136 (13). HRMS calcd. (%) for  $(\text{C}_{23}\text{H}_{17}\text{ClFN} - \text{H})$ : 360.0955; found: 360.0966.

**1-((2-bromophenyl)ethynyl)-2-(4-fluorophenyl)-1,2,3,4-tetrahydroisoquinoline (3j):** Brown oil;  $t_r = 25.4$ ;  $R_f = 0.4$  (hexane/ethyl acetate : 4/1).  $^1\text{H}$  NMR (300 MHz,  $\text{CDCl}_3$ ):  $\delta$  7.48 (dd,  $J = 7.9, 1.3$  Hz, 1H, ArH), 7.4-7.35 (m, 1H, ArH), 7.29 (dd,  $J = 7.6, 1.8$  Hz, 1H, ArH), 7.25-7.15 (m, 3H, ArH), 7.15-6.95 (m, 6H, ArH), 5.59 (s, 1H, ArCHN), 3.75-3.55 (m, 3H,  $\text{CH}_2\text{CH}_2\text{N}$ ), 3.15 (m, 1H,  $\text{CHHCH}_2\text{N}$ ), 2.97 (dt,  $J = 16.3, 3.7$  Hz, 1H,  $\text{CHHCH}_2\text{N}$ ).  $^{13}\text{C}$  NMR (75 MHz,  $\text{CDCl}_3$ ):  $\delta$  157.6 (d,  $J = 239.1$  Hz), 146.4, 134.9, 134.2, 133.5, 132.4, 129.4, 129.1, 127.7, 127.5, 126.9, 126.4, 125.7, 125.1, 119.6 (d,  $J = 7.6$  Hz, 2C), 115.7 (d,  $J = 22.1$  Hz, 2C), 93.1, 84.1, 53.9, 44.3, 29.2. IR (ATR):  $\nu$  3063, 2920, 1507, 1468  $\text{cm}^{-1}$ . MS (EI)  $m/z$  (%): 407 ( $M^+ + 1$ , 5), 406 ( $M^+$ , 12), 405 ( $M^+ - 1$ , 5), 404 ( $M^+ - 2$ , 12), 281 (20), 209 (36), 207 (100), 202 (11). HRMS calcd. (%) for  $(\text{C}_{23}\text{H}_{17}\text{BrFN} - \text{H})$ : 404.0450; found: 404.0451.

**1-(cyclohex-1-en-1-ylethynyl)-2-(4-fluorophenyl)-1,2,3,4-tetrahydroisoquinoline (3k).** Brown oil;  $t_r = 20.99$ ;  $R_f = 0.6$  (hexane/ethyl acetate : 4/1).  $^1\text{H}$  NMR (300 MHz,  $\text{CDCl}_3$ ):  $\delta$  7.3-7.25 (m, 1H, ArH), 7.20-7.15 (m, 4H, ArH), 7.05-6.95 (m, 3H, ArH), 5.95-5.9 (m, 1H,  $\text{C}=\text{CH}$ ), 5.42 (s, 1H, ArCHN), 3.6-3.50 (m, 2H,  $\text{CH}_2\text{CH}_2\text{N}$ ), 3.15-3.05 (m, 1H,  $\text{CHHCH}_2\text{N}$ ), 2.91 (dt,  $J = 16.2, 3.6$  Hz, 1H,  $\text{CHHCH}_2\text{N}$ ), 2.0-1.95 (m, 4H,  $\text{CH}-\text{C}_4\text{H}_4\text{H}_4-\text{C}=\text{C}$ ), 1.55-1.50 (m, 4H,  $\text{CH}-\text{C}_4\text{H}_4\text{H}_4-\text{C}=\text{C}$ ).  $^{13}\text{C}$  NMR (75 MHz,  $\text{CDCl}_3$ ):  $\delta$  157.3 (d,  $J = 238.7$  Hz), 146.4, 135.6, 134.6, 133.8, 128.9, 127.4, 127.0, 126.1, 120.2, 119.2 (d,  $J = 7.6$  Hz, 2C), 115.4 (d,  $J = 22.1$  Hz, 2C), 87.1, 85.2, 53.5, 43.9, 29.2, 28.9, 25.5, 22.2, 21.4. IR (ATR):  $\nu$  3050, 3023, 2927, 2857, 1507  $\text{cm}^{-1}$ . MS (EI)  $m/z$  (%): 331 ( $M^+$ , 18), 330 ( $M^+ - 1$ , 34), 281 (15), 208 (14), 207 (100). HRMS calcd. (%) for  $\text{C}_{23}\text{H}_{22}\text{FN}$ : 331.1736; found: 331.1719.

**1-(cyclohexylethynyl)-2-(4-fluorophenyl)-1,2,3,4-tetrahydroisoquinoline (3l).**

Yellow oil;  $t_r = 19.87$ ,  $R_f = 0.3$  (hexane/ethyl acetate 9/1).  $^1\text{H}$  NMR (300 MHz,  $\text{CDCl}_3$ ):  $\delta$  7.3-7.25 (m, 1H, ArH), 7.2-7.1 (m, 3H, ArH), 7.05-6.95 (m, 4H, ArH), 5.32 (s, 1H, ArCHN), 3.52 (dd,  $J = 8.5, 3.6$  Hz, 2H,  $\text{CH}_2\text{CH}_2\text{N}$ ), 3.10-3.05 (m, 1H,  $\text{CHHCH}_2\text{N}$ ), 2.89 (dt,  $J = 16.2, 3.6$  Hz, 1H,  $\text{CHHCH}_2\text{N}$ ), 2.3-2.25 (m, 1H,  $\text{C}_6\text{H}_{11}$ ), 1.65-1.5 (m, 4H,  $\text{C}_6\text{H}_{11}$ ), 1.45-1.4 (m, 1H,  $\text{C}_6\text{H}_{11}$ ), 1.3-1.15 (m, 5H,  $\text{C}_6\text{H}_{11}$ ).  $^{13}\text{C}$  NMR (75 MHz,  $\text{CDCl}_3$ ):  $\delta$  157.3 (d,  $J = 238.6$  Hz), 146.6, 136.0, 133.7, 128.8, 127.3, 126.9, 126.0, 119.3 (d,  $J = 7.6$  Hz, 2C), 115.3 (d,  $J = 22.1$  Hz, 2C), 89.9, 78.6, 53.2, 43.8, 32.5 (2C), 29.0, 28.8 (2C), 25.8, 24.4. IR (ATR):  $\nu$  3061, 3024, 2927, 2852, 1507  $\text{cm}^{-1}$ . MS (EI)  $m/z$  (%): 334 ( $\text{M}^+ + 1$ , 11), 333 ( $\text{M}^+$ , 74), 332 ( $\text{M}^+ - 1$ , 100), 250 (30), 224 (12), 167 (16), 165 (13), 153 (11), 141 (13), 128 (17), 115 (12), 95 (13). HRMS calcd. (%) for  $\text{C}_{23}\text{H}_{24}\text{FN}$ : 333.1893; found: 333.1885.

**2-(4-fluorophenyl)-1-(nona-1,8-diyn-1-yl)-1,2,3,4-tetrahydroisoquinoline (3m).**

Pale yellow oil;  $t_r = 20.50$ ,  $R_f = 0.5$  (hexane/ethyl acetate : 4/1).  $^1\text{H}$  NMR (300 MHz,  $\text{CDCl}_3$ ):  $\delta$  7.30-7.25 (m, 1H, ArH), 7-20-7.10 (m, 3H, ArH), 7.05-6.95 (m, 4H, ArH), 5.31 (s, 1H, ArCHN), 3.60-3.50 (m, 2H,  $\text{CH}_2\text{CH}_2\text{N}$ ), 3.09 (dt,  $J = 16.4, 8.3$ , 1H,  $\text{CHHCH}_2\text{N}$ ), 2.90 (dt,  $J = 16.4, 3.6$  Hz, 1H,  $\text{CHHCH}_2\text{N}$ ), 2.15-2.00 (m, 4H, 2x  $\text{C}\equiv\text{C}-\text{CH}_2$ ), 1.92 (t,  $J = 2.6$  Hz, 1H,  $\text{C}\equiv\text{C}-\text{H}$ ), 1.50-1.15 (m, 6H, (m, 6H,  $\text{C}\equiv\text{C}-\text{CH}_2-\text{CH}_2-\text{CH}_2-\text{CH}_2-\text{CH}_2-\text{C}\equiv\text{C}$ ).  $^{13}\text{C}$  NMR (75 MHz,  $\text{CDCl}_3$ ):  $\delta$  157.4 (d,  $J = 238.8$  Hz), 146.6, 136.1, 133.9, 129.0, 127.5, 127.2, 126.3, 119.2 (d,  $J = 7.6$  Hz, 2C), 115.5 (d,  $J = 22.1$  Hz, 2C), 85.7, 84.6, 79.1, 68.4, 53.8, 43.9, 29.1, 28.3, 28.1, 27.9, 18.7, 18.4. IR (ATR):  $\nu$  3303, 2937, 2859, 1508  $\text{cm}^{-1}$ . MS (EI)  $m/z$  (%): 345 ( $\text{M}^+$ , 38), 344 ( $\text{M}^+ - 1$ , 100), 302 (12), 276 (27), 264 (13), 262 (31), 250 (27), 226 (12), 224 (19), 207 (18), 155 (13), 153 (13), 142 (11), 141 (23), 95 (13). HRMS calcd. (%) for  $\text{C}_{24}\text{H}_{24}\text{FN}$ : 345.1893; found: 345.1877.

**2-(4-fluorophenyl)-1-(3-((tetrahydro-2H-pyran-2-yl)oxy)prop-1-yn-1-yl)-1,2,3,4-tetrahydroisoquinoline (3n):**

Colourless oil;  $t_r = 22.28$ ;  $R_f = 0.4$  (hexane/ethyl acetate : 4/1).  $^1\text{H}$  NMR (300 MHz,  $\text{CDCl}_3$ ):  $\delta$  7.30-7.15 (m, 4H, ArH), 7.05-6.95 (m, 4H, ArH), 5.39 (s, 1H, ArCHN), 4.56 (t,  $J = 3.2$  Hz, 1H, O-CH-O), 4.18 (d,  $J = 1.9$  Hz, 2H,  $\text{C}\equiv\text{C}-\text{CH}_2\text{O}$ ), 3.8-3.65 (m, 1H,  $\text{CH}_2\text{CH}_2\text{O}$ ), 3.6-3.5 (m, 2H,  $\text{CH}_2\text{CH}_2\text{N}$ ), 3.45-3.35 (m, 1H,  $\text{CH}_2\text{CH}_2\text{O}$ ), 3.10 (ddd,  $J = 16.3, 9.7, 7.0$  Hz, 1H,  $\text{CHHCH}_2\text{N}$ ), 2.90 (dt,  $J = 16.3, 3.5$  Hz, 1H,  $\text{CHHCH}_2\text{N}$ ), 1.80-1.70 (m, 1H,  $\text{CHCH}_2\text{CH}_2\text{CH}_2\text{CH}_2\text{O}$ ), 1.65-1.40 (m, 5H,  $\text{CHCH}_2\text{CH}_2\text{CH}_2\text{CH}_2\text{O}$ ).  $^{13}\text{C}$  NMR (75 MHz,  $\text{CDCl}_3$ ):  $\delta$  157.5 (d,  $J = 239.2$  Hz), 146.5, 135.0, 134.0, 129.1, 127.5, 127.4, 126.3, 119.3 (d,  $J = 7.7$  Hz, 2C), 115.6 (d,  $J = 22.1$  Hz, 2C), 96.4, 84.8, 81.2, 62.1, 54.3, 53.3, 43.9, 30.3, 29.0, 25.5, 19.2. IR (ATR):  $\nu$  2923, 2849, 1230, 1021  $\text{cm}^{-1}$ . MS (EI)  $m/z$  (%): 365 ( $\text{M}^+$ , 16), 364 ( $\text{M}^+ - 1$ ), 281 (16), 280 (16), 264 (56), 263 (37), 262 (100), 250 (19), 248 (29), 235 (12), 226 (22), 224 (21), 207 (27), 141 (21), 140 (12), 139 (13), 129 (14), 128 (14), 122 (15), 115 (26), 95 (18), 85 (17), 84 (46), 83 (24), 57 (12), 56 (25), 55 (60), 54 (12). HRMS calcd. (%) for  $\text{C}_{23}\text{H}_{24}\text{FNO}_2$ : 365.1791; found: 365.1781.

**2-(4-fluorophenyl)-1-(nitromethyl)-1,2,3,4-tetrahydroisoquinoline (3o):**

<sup>3</sup> Yellow oil;  $t_r = 17.45$ ;  $R_f = 0.3$  (hexane/ethyl acetate : 4/1).  $^1\text{H}$  NMR (300 MHz,  $\text{CDCl}_3$ ):  $\delta$  7.3-7.05 (m, 4H, ArH), 6.95-6.85 (m, 4H, ArH), 5.42 (dd,  $J = 8.6, 5.9$  Hz, 1H, ArCHN), 4.82 (dd,  $J = 12.0, 8.6$  Hz, 1H,  $\text{CHHNO}_2$ ), 4.55 (dd,  $J = 12.0, 5.9$  Hz, 1H,  $\text{CHHNO}_2$ ), 3.6-3.55 (m, 2H,  $\text{CH}_2\text{CH}_2\text{N}$ ), 3.05-2.95 (m, 1H,  $\text{CHHCH}_2\text{N}$ ), 2.70 (dt,  $J = 16.5, 4.2$  Hz, 1H,  $\text{CHHCH}_2\text{N}$ ).  $^{13}\text{C}$  NMR (75 MHz,  $\text{CDCl}_3$ ):  $\delta$  157.1 (d,  $J = 239.1$  Hz), 145.3, 135.2, 132.5, 129.4, 128.0, 126.9, 126.7, 117.8 (d,  $J = 7.6$  Hz, 2C), (d,  $J = 22.2$  Hz, 2C), 115.8,

78.7, 58.6, 42.7, 25.7. IR (ATR):  $\nu$  2913, 2843, 1547, 1506  $\text{cm}^{-1}$ . MS (EI)  $m/z$  (%): 286 ( $M^+$ , 5), 227 ( $M^+$ , 23), 226 (100), 225 (29), 224 (68), 128 (10), 104 (13), 95 (12).

**2-(4-fluorophenyl)-1-(1-methyl-1H-indol-3-yl)-1,2,3,4-tetrahydroisoquinoline (3p):**

White solid; m.p. 137-139 °C (ethanol);  $t_r$  = 24.6;  $R_f$  = 0.5 (hexane/ethyl acetate : 4/1).  $^1\text{H}$  NMR (300 MHz,  $\text{CDCl}_3$ ):  $\delta$  7.42 (dt,  $J$  = 8.0, 0.9 Hz, 1H, ArH), 7.25-7.1 (m, 6H, ArH), 7.0 (ddd,  $J$  = 8.0, 6.8, 1.3 Hz, 1G, ArH), 6.95-6.85 (m, 4H, ArH), 6.43 (s, 1H, C=CHN), 6.0 (s, 1H, ArCHN), 3.61 (s, 3H, N- $\text{CH}_3$ ), 3.60-3.40 (m, 2H,  $\text{CH}_2\text{CH}_2\text{N}$ ), 3.02 (ddd,  $J$  = 16.1, 9.8, 5.8 Hz, 1H,  $\text{CHHCH}_2\text{N}$ ), 2.79 (d,  $J$  = 16.1, 4.3 Hz,  $\text{CHHCH}_2\text{N}$ ).  $^{13}\text{C}$  NMR (75 MHz,  $\text{CDCl}_3$ ):  $\delta$  156.7 (d,  $J$  = 237.7 Hz), 146.9, 137.6, 137.4, 135.4, 129.0 (2C), 128.3, 127.2, 126.7, 125.9, 121.8, 120.2, 119.3, 118.6 (d,  $J$  = 7.5 Hz, 2C), 117.5, 115.6 (d,  $J$  = 22.0 Hz, 2C), 109.3, 57.7, 43.4, 32.8, 26.9. IR (ATR):  $\nu$  3047, 2957, 1505  $\text{cm}^{-1}$ ; MS (EI)  $m/z$  (%): 355 ( $M^+$ -1, 1%), 262 (20), 186 (13), 170 (37), 169 (14), 168 (23), 142 (10), 141 (26), 115 (12), 104 (12), 94 (66), 78 (100), 77 (43), 76 (16), 66 (16), 65 (16), 52 (13), 51 (22), 50 (17). HRMS calcd. (%) for  $\text{C}_{24}\text{H}_{21}\text{FN}_2$ : 356.1689; found: 356.1692.

**(diethyl(2-(4-fluorophenyl)-1,2,3,4-tetrahydroisoquinolin-1-yl)phosphonate (3q):**<sup>6</sup>

Pale pink oil;  $t_r$  = 17.52,  $R_f$  = 0.3 (hexane/ethyl acetate : 4/1).  $^1\text{H}$  NMR (300 MHz,  $\text{CDCl}_3$ ):  $\delta$  7.40-7.30 (m, 1H, ArH), 7.25-7.10 (m, 3H, ArH), 7.0-6.85 (m, 4H, ArH), 5.06 (d,  $J$  = 20.2 Hz, 1H NCHP), 4.3-3.8, 3.6-3.45 (2m, 1 and 5H, respectively,  $\text{CH}_2\text{CH}_2\text{N}$  +  $2\text{xOCH}_2\text{CH}_3$ ), 3.10-2.85 (m, 2H,  $\text{CH}_2\text{CH}_2\text{N}$ ), 1.24 (t,  $J$  = 7.07, 3H,  $\text{OCH}_2\text{CH}_3$ ), 1.14 (td,  $J$  = 7.07, 0.28, 3H,  $\text{OCH}_2\text{CH}_3$ ).  $^{13}\text{C}$  NMR (75 MHz,  $\text{CDCl}_3$ ):  $\delta$  156.5 (d,  $J$  = 237.7 Hz), 146.3 (dd,  $J$  = 6.4, 1.9 Hz), 136.4 (d,  $J$  = 5.5 Hz), 130.5, 128.9 (2C), 127.6, 126.0, 116.7 (d,  $J$  = 7.4 Hz, 2C), 115.6 (d,  $J$  = 22.1 Hz, 2C), 63.4 (d,  $J$  = 7.3 Hz), 62.4 (d,  $J$  = 7.7 Hz), 59.4 (d,  $J$  = 158.4 Hz), 44.38, 16.5 (d,  $J$  = 5.9 Hz), 26.64, 16.4 (d,  $J$  = 5.9 Hz). IR (ATR):  $\nu$  1508, 1234, 1018  $\text{cm}^{-1}$ . MS (EI)  $m/z$  (%): 363 ( $M^+$ , 1), 227 (21), 226 (100), 224 (13).

**2-(2-(4-fluorophenyl)-1,2,3,4-tetrahydroisoquinolin-1-yl)cyclohexanone (3r):**<sup>7</sup>

Yellow oil;  $t_r$  = 19.73,  $R_f$  = 0.4 (hexane/ethyl acetate : 4/1).  $^1\text{H}$  NMR (300 MHz,  $\text{CDCl}_3$ ):  $\delta$  7.25-6.75 (4m, 1, 7, 7 y 1H, respectively, ArH), 5.56 (d,  $J$  = 8.5 Hz, 1H, ArCHN *anti*), 5.47 (d,  $J$  = 5.2 Hz, 1H, ArCHN *syn*), 3.5-3.7 (2m, 2 y 2H, respectively,  $\text{CH}_2\text{CH}_2\text{N}$ ), 2.8-2.9 (m, 6H,  $\text{CH}_2\text{CH}_2\text{N}$  +  $\text{CHC}=\text{O}$ ), 2.15-2.45 (2m, 2 y 2H, respectively,  $\text{CH}_2\text{-C}=\text{O}$ ), 1.25-1.9 (m, 12H,  $6\text{xCH}_2$ ).  $^{13}\text{C}$  NMR (75 MHz,  $\text{CDCl}_3$ ):  $\delta$  212.1 (*anti*), 211.9 (*syn*), 156.3 (d,  $J$  = 237.5 Hz, *syn*), 155.2 (d,  $J$  = 235.3 Hz, *anti*), 146.2 (2C, *anti*, *syn*), 140.1 (*anti*), 135.8 (*syn*), 135.0 (*syn*), 134.5 (*anti*), 128.9 (*syn*), 128.1 (*anti*), 128.0 (*syn*), 127.3 (*anti*), 126.8 (2C, *anti*, *syn*), 126.4 (*anti*), 125.8 (*syn*), 117.1 (d,  $J$  = 7.3 Hz, *syn*), 115.5 (d,  $J$  = 22.0 Hz, *syn*), 115.4 (d,  $J$  = 22.0 Hz, *anti*), 113.6 (d,  $J$  = 7.3 Hz, *anti*), 59.4 (*anti*), 56.5 (*syn*), 55.8 (*syn*), 54.7 (*anti*), 44.1 (*anti*), 43.5 (*syn*), 43.2 (*anti*), 41.4 (*syn*), 32.8 (*anti*), 30.5 (*syn*), 28.8 (*anti*), 27.5 (*syn*), 27.4 (*anti*), 26.8 (*syn*), 25.7 (*anti*), 23.8 (*syn*). IR (ATR):  $\nu$  2938, 2862, 1703, 1507  $\text{cm}^{-1}$ . MS (EI)  $m/z$  (%): 323 ( $M^+$ , 0.5%), 227 (19), 226 (100), 55 (14).

**1-(2-(4-fluorophenyl)-1,2,3,4-tetrahydroisoquinolin-1-yl)but-3-en-2-one (3s).**

Yellow oil;  $t_r$  = 17.51,  $R_f$  = 0.4 (hexane/ethyl acetate : 4/1).  $^1\text{H}$  NMR (300 MHz,  $\text{CDCl}_3$ ):  $\delta$  7.2-7.1 (m, 4H, ArH), 7.0-6.8 (m, 4H, ArH), 6.29 (dd,  $J$  = 17.6, 10.5 Hz, 1H, C=CHH), 6.10 (dd,  $J$  = 17.6, 1.1 Hz, 1H, CH=CH<sub>2</sub>), 5.76 (dd,  $J$  = 10.5 Hz, 1.1 Hz, 1H, CH=CHH), 5.37 (t,  $J$  = 6.3 Hz, 1H, ArCHN), 3.45-3.65 (m, 2H,  $\text{CH}_2\text{CH}_2\text{N}$ ), 3.19 (dd,  $J$  = 16.1, 6.3 Hz, 1H, CHHC=O), 3.04 (m, 1H, CHHCH<sub>2</sub>N), 2.94 (dd,  $J$  = 16.1, 6.3 Hz,

1H, CHHC=O), 2.80 (dt,  $J = 16.2, 4.5$  Hz, 1H, CHHCH<sub>2</sub>N). <sup>13</sup>C NMR (75 MHz, CDCl<sub>3</sub>):  $\delta$  199.1, 156.5 (d,  $J = 237.3$  Hz), 145.8, 138.2, 136.9, 134.3, 128.9, 128.7, 127.1, 127.0, 126.4, 116.9 (d,  $J = 7.4$  Hz, 2C), 115.8 (d,  $J = 22.1$  Hz, 2C), 55.9, 46.1, 42.6, 27.1. IR (ATR):  $\nu$  3052, 1676, 987, 956 cm<sup>-1</sup>. MS (EI)  $m/z$  (%): 295 (M<sup>+</sup>, 6), 227 (19), 226 (100), 225 (11), 207 (17), 55 (11). HRMS calcd. (%) for C<sub>19</sub>H<sub>18</sub>FNO: 295.1862; found: 295.1845.

**(E)-2-(4-fluorophenyl)-1-styryl-1,2,3,4-tetrahydroisoquinoline (3t).** Orange oil;  $t_r = 21.48$ ,  $R_f = 0.6$  (hexane/ethyl acetate : 4/1). <sup>1</sup>H NMR (300 MHz, CDCl<sub>3</sub>):  $\delta$  7.45-7.10 (m, 9H, ArH), 7.05-6.75 (m, 4H, ArH), 6.40 (d,  $J = 15.9$  Hz, 1H, CH=CH-Ph), 6.3 (dd,  $J = 15.9, 4.7$  Hz, 1H, CHCH=CH-Ph), 5.25 (d,  $J = 4.7$  Hz 1H, ArCHN), 3.63 (ddd,  $J = 12.2, 7.3, 5.1$  Hz, 1H, CH<sub>2</sub>CHHN), 3.55-3.45 (m, 1H, CH<sub>2</sub>CHHN), 3.10-2.85 (m, 2H, CH<sub>2</sub>CH<sub>2</sub>N). <sup>13</sup>C NMR (75 MHz, CDCl<sub>3</sub>):  $\delta$  156.4 (d,  $J = 237.0$  Hz), 146.5 (2C), 136.9, 136.5, 135.4, 131.0, 130.4, 128.6 (2C), 127.8, 127.6, 127.0, 126.6 (2C), 126.4, 116.6 (d,  $J = 7.4$  Hz, 2C), 115.7 (d,  $J = 22.1$  Hz, 2C), 62.4, 43.9, 28.4. IR (ATR):  $\nu$  3025, 2904, 2834, 1735, 1507 cm<sup>-1</sup>. MS (EI)  $m/z$  (%): 329 (M<sup>+</sup>, 52), 328 (M<sup>+</sup>-1, 38), 252 (10), 238 (30), 237 (20), 226 (100), 224 (17), 128 (12), 115 (14), 95 (11), 91 (24). HRMS calcd. (%) for C<sub>23</sub>H<sub>20</sub>FN: 329.1580; found: 329.1577.

**2-(4-fluorophenyl)-3,4-dihydroisoquinolin-1(2H)-one (4a).** Yellow solid; m.p. 112-114 °C (ethanol);  $t_r = 16.56$ ;  $R_f = 0.5$  (hexane/ethyl acetate : 3/2). <sup>1</sup>H NMR (300 MHz, CDCl<sub>3</sub>):  $\delta$  8.14 (dd,  $J = 7.7, 1.2$  Hz, 1H, ArH), 7.47 (td,  $J = 7.4, 1.5$  Hz, 1H, ArH), 7.4-7.3 (m, 3H, ArH), 7.3-7.2 (m, 1H, ArH), 7.15-7.0 (m, 2H, ArH), 3.95 (t,  $J = 6.5$  Hz, 2H, CH<sub>2</sub>CH<sub>2</sub>N), 3.14 (t,  $J = 6.5$  Hz, 2H, CH<sub>2</sub>CH<sub>2</sub>N). <sup>13</sup>C NMR (75 MHz, CDCl<sub>3</sub>):  $\delta$  164.5, 160.8 (d,  $J = 245.6$  Hz), 139.2, 138.3, 132.3, 130.1, 129.6, 128.8, 127.3 (d,  $J = 6.7$  Hz, 2C), 127.1, 115.8 (d,  $J = 22.6, 2C$ ), 49.7, 28.7. IR (ATR):  $\nu$  1650, 1500 cm<sup>-1</sup>. MS (EI)  $m/z$  (%): 242 (M<sup>+</sup>+1, 16), 241 (M<sup>+</sup>, 91), 240 (M<sup>+</sup>-1, 25), 122 (20), 119 (13), 118 (100), 95 (18), 90 (46), 89 (24). HRMS calcd. (%) for C<sub>15</sub>H<sub>12</sub>FNO: 241.0903; found: 241.0907.

#### IV. References

- (1) J. J. Zhang, Q. Y. Meng, G. X. Wang, Q. Liu, B. Chen, K. Feng, C. H. Tung, L. Z. Wu, *Chem. Eur. J.*, 2013, **19**, 6443-6450.
- (2) A. S.-K. Tsang, P. Jensen, J. M. Hook, A. S. K. Hashmi, M. H. Tood, *Pure Appl. Chem.*, 2011, **83**, 655-665.
- (3) M. Brzozowski, J. A. Forni, P. G. Savage, A. Polyzos, *Chem. Commun.*, 2015, **51**, 334-337.
- (4) S. O'Sullivan, E. Doni, T. Tuttle, J. A. Murphy, *Angew. Chem. Int. Ed.*, 2014, **53**, 474-478.
- (5) R. Hudson, S. Ishikawa, C.-J. Li, A. Moores, *Synlett*, 2013, **24**, 1637-1642.
- (6) M. Rueping, S. Zhu, R. M. Koenigs, *Chem. Commun.*, 2011, **47**, 8679-8681.
- (7) G. Zhang, Y. Ma, S. Wang, W. Kong, R. Wang, *Chem. Sci.*, 2013, **4**, 2645-2651.



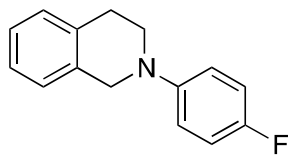

**1a**

$^1\text{H}$  NMR (300 MHz,  $\text{CDCl}_3$ )

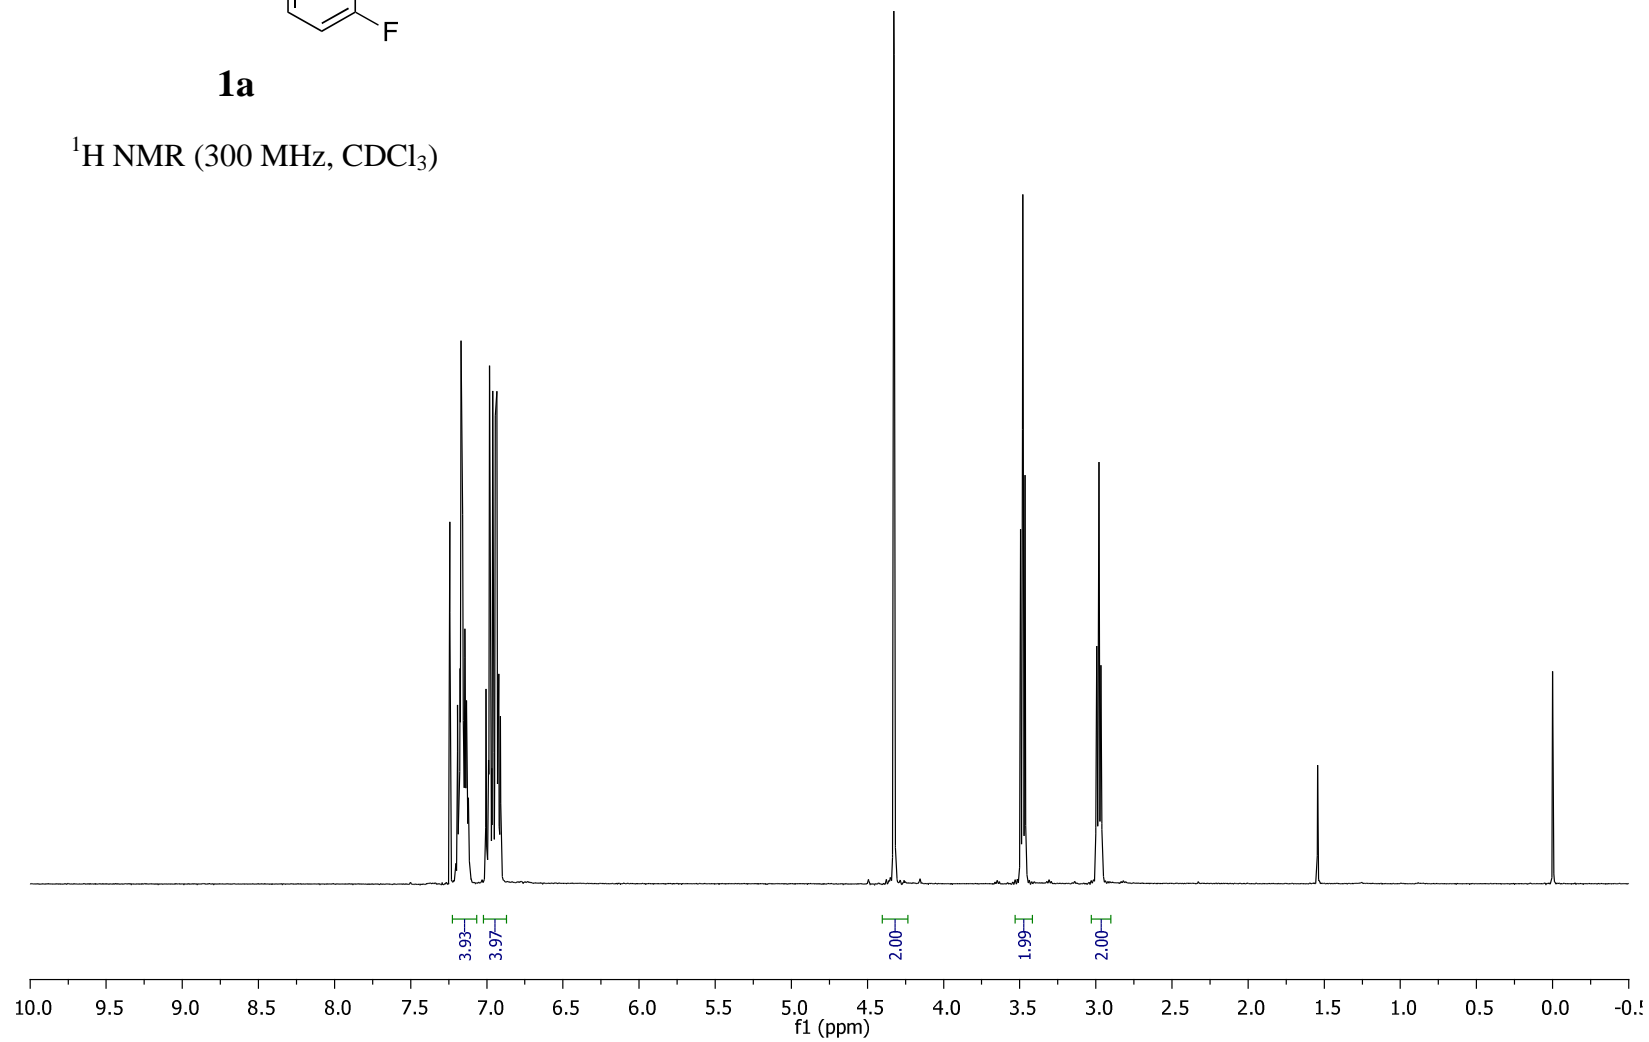

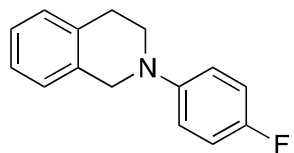

**1a**

$^{13}\text{C}$  NMR (75 MHz,  $\text{CDCl}_3$ )

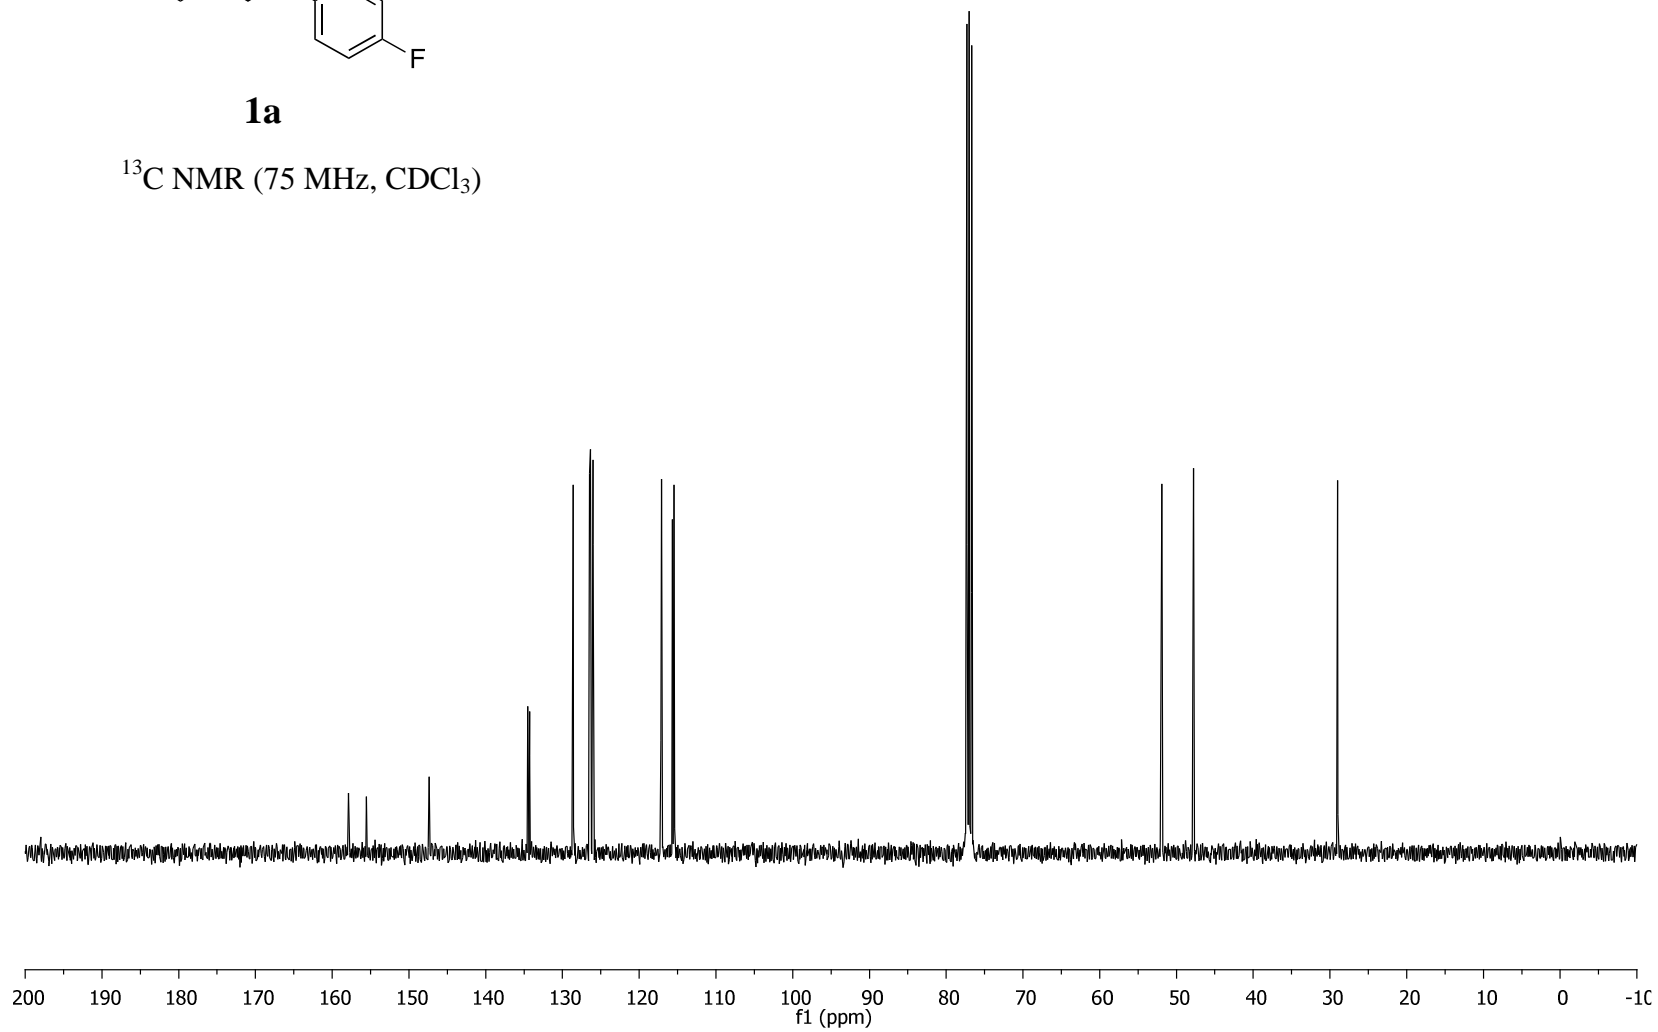

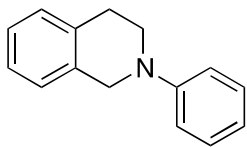

**1b**

$^1\text{H}$  NMR (300 MHz,  $\text{CDCl}_3$ )

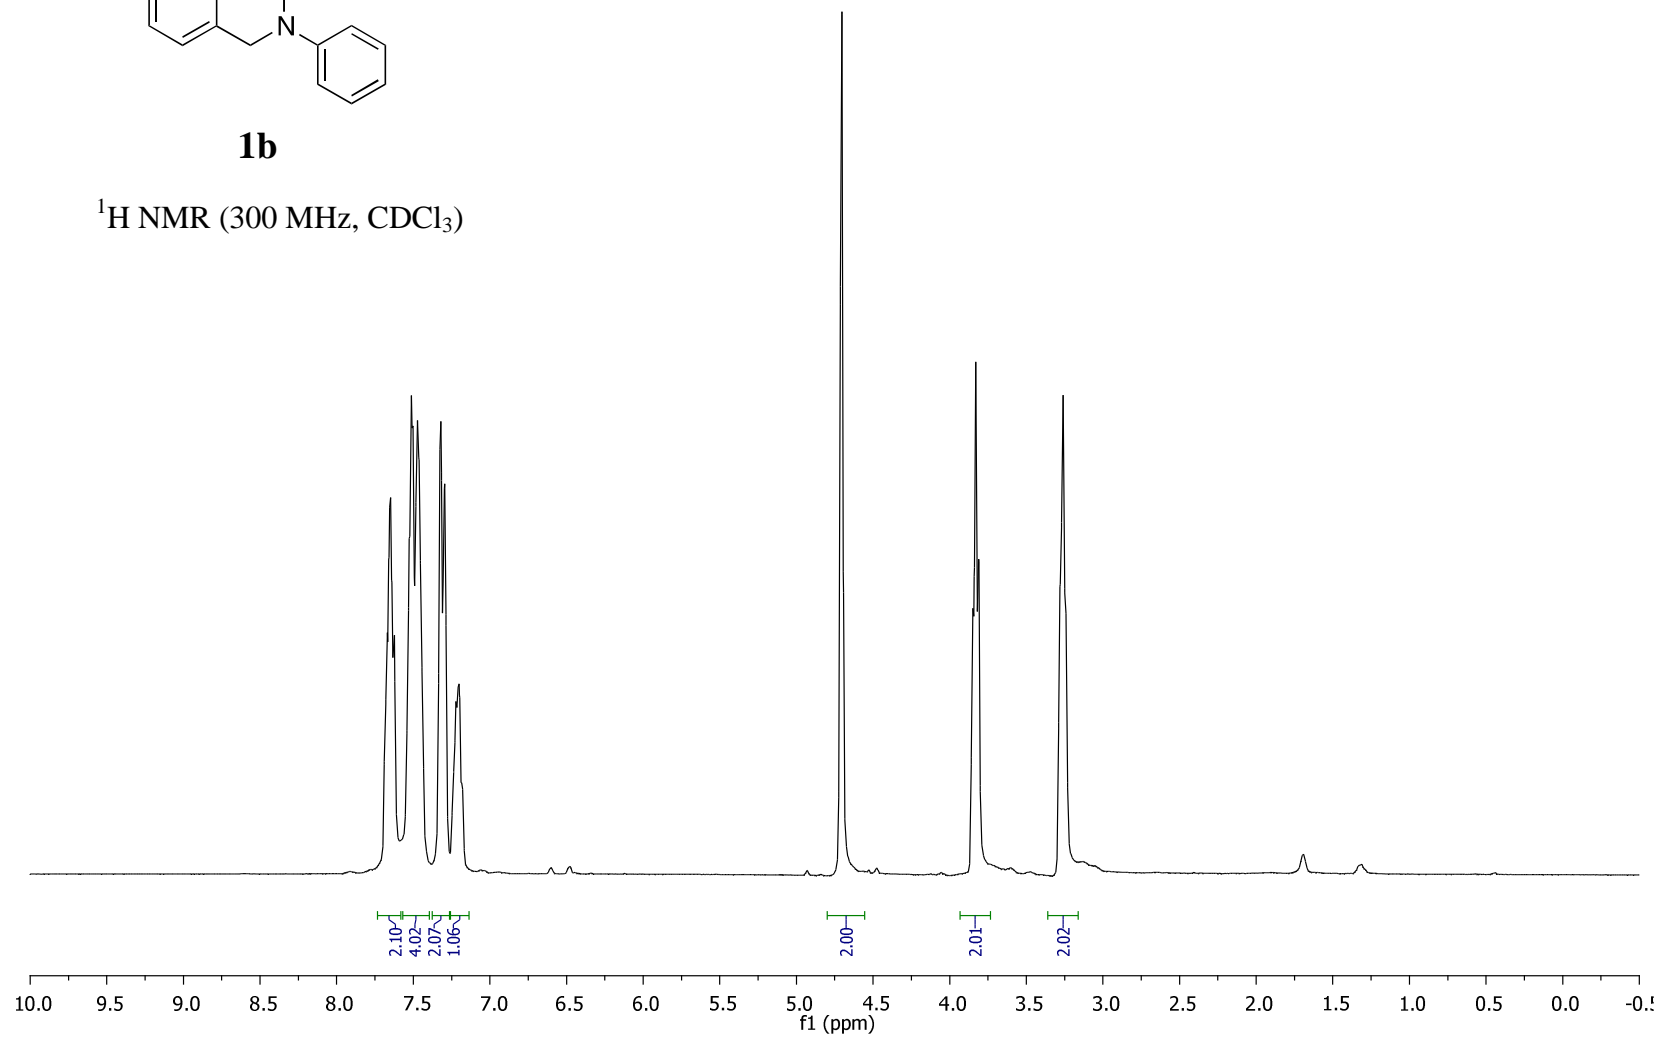

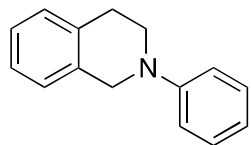

**1b**

$^{13}\text{C}$  NMR (75 MHz,  $\text{CDCl}_3$ )

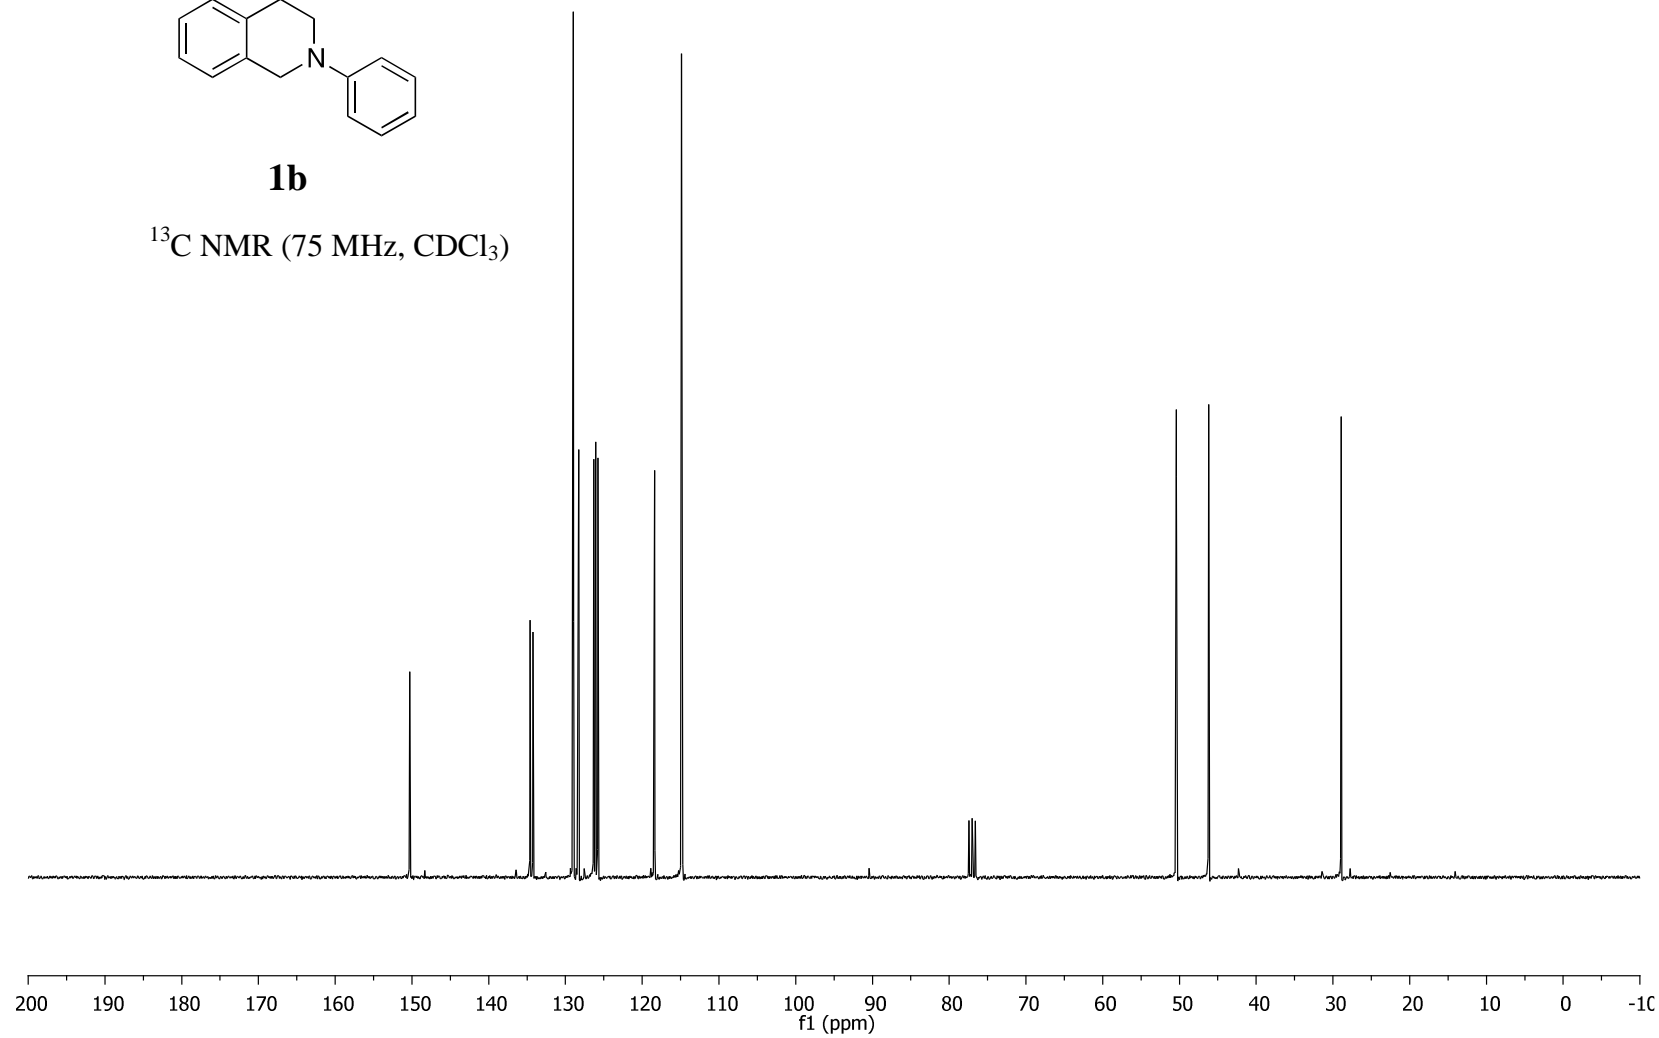

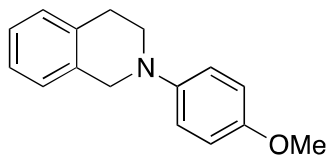

**1c**

<sup>1</sup>H NMR (300 MHz, CDCl<sub>3</sub>)

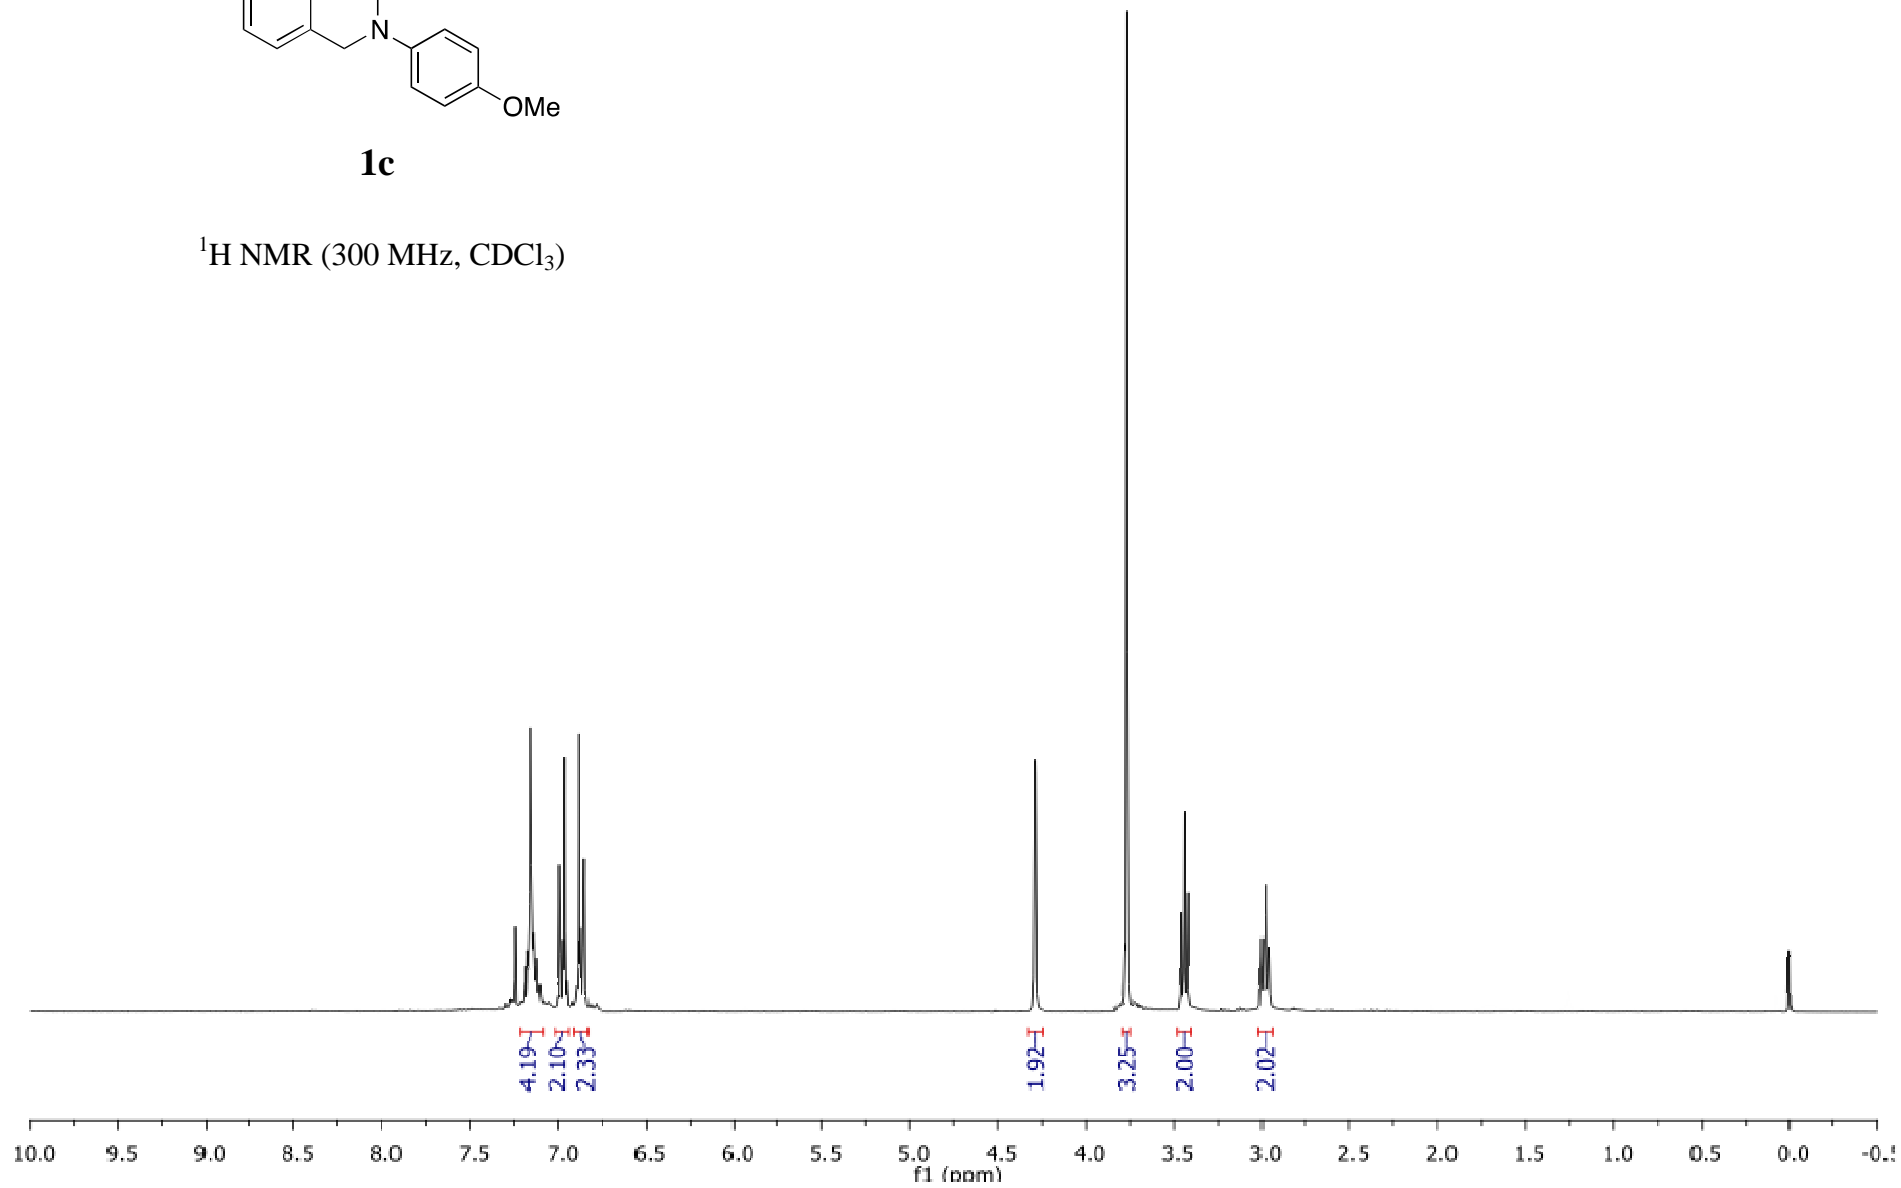

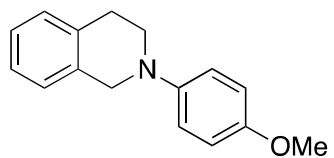

**1c**

$^{13}\text{C}$  NMR (75 MHz,  $\text{CDCl}_3$ )

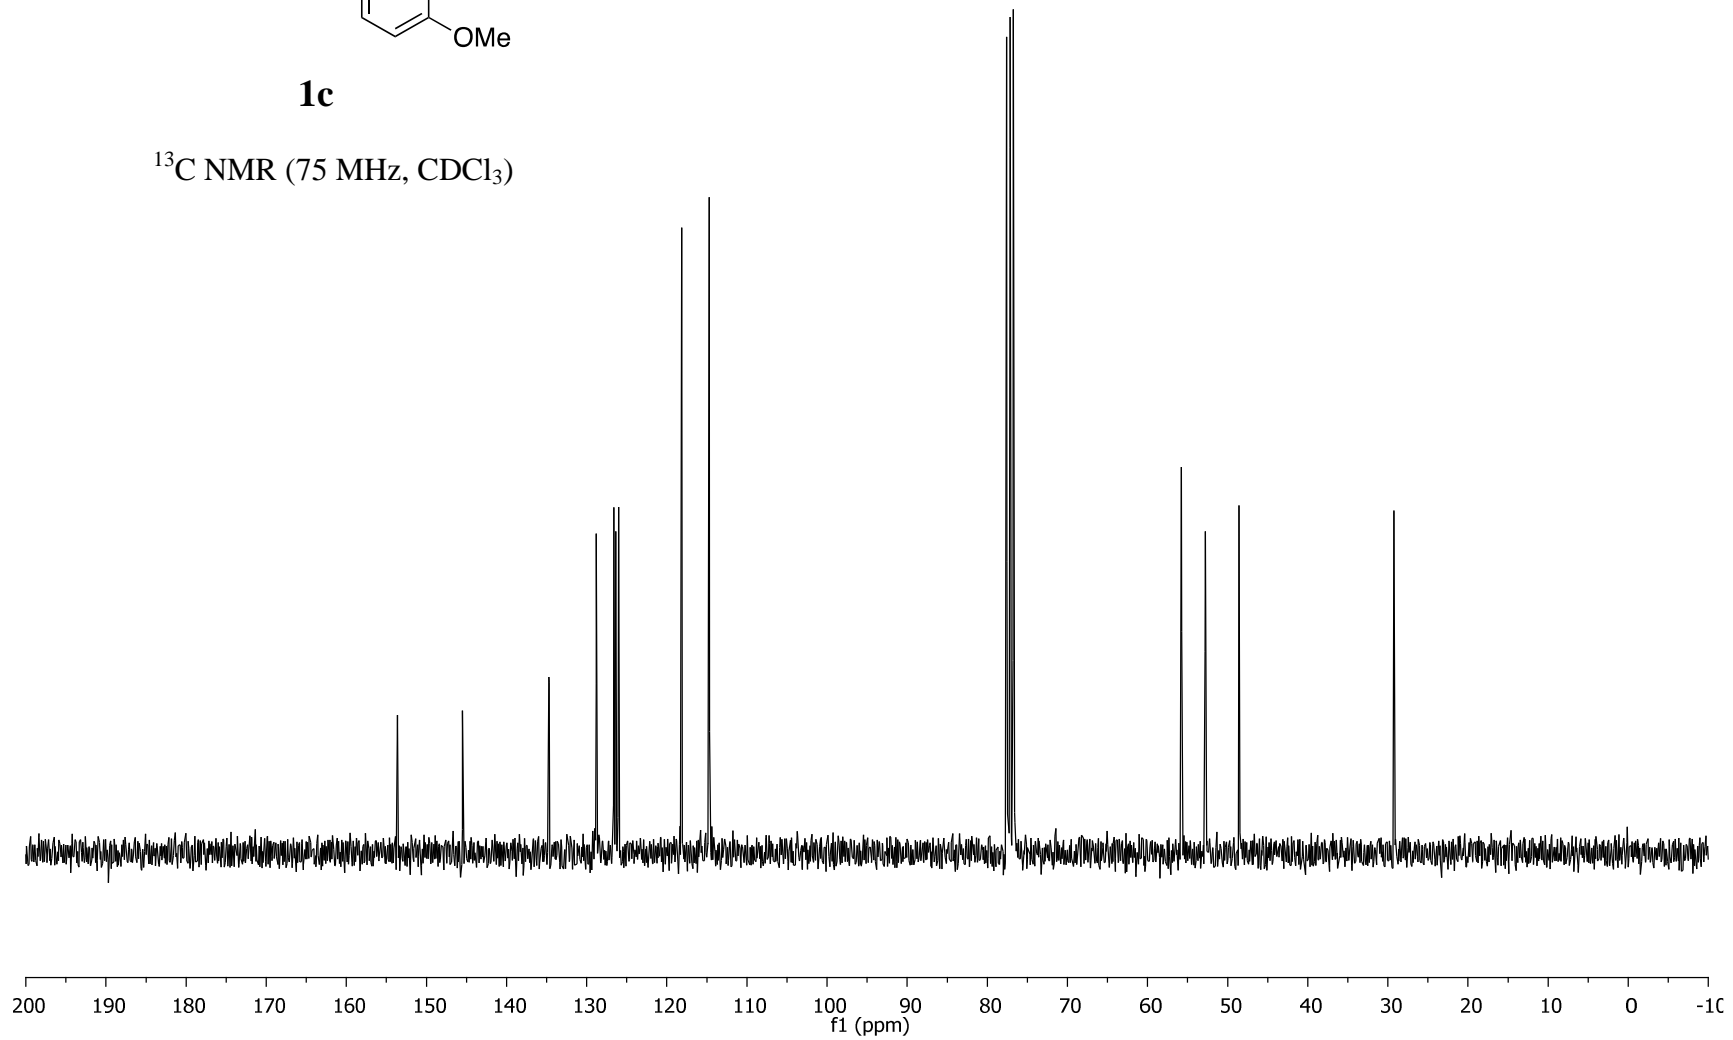

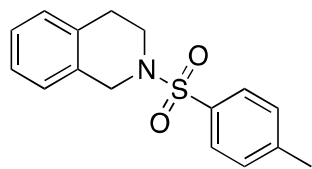

**1d**

<sup>1</sup>H NMR (300 MHz, CDCl<sub>3</sub>)

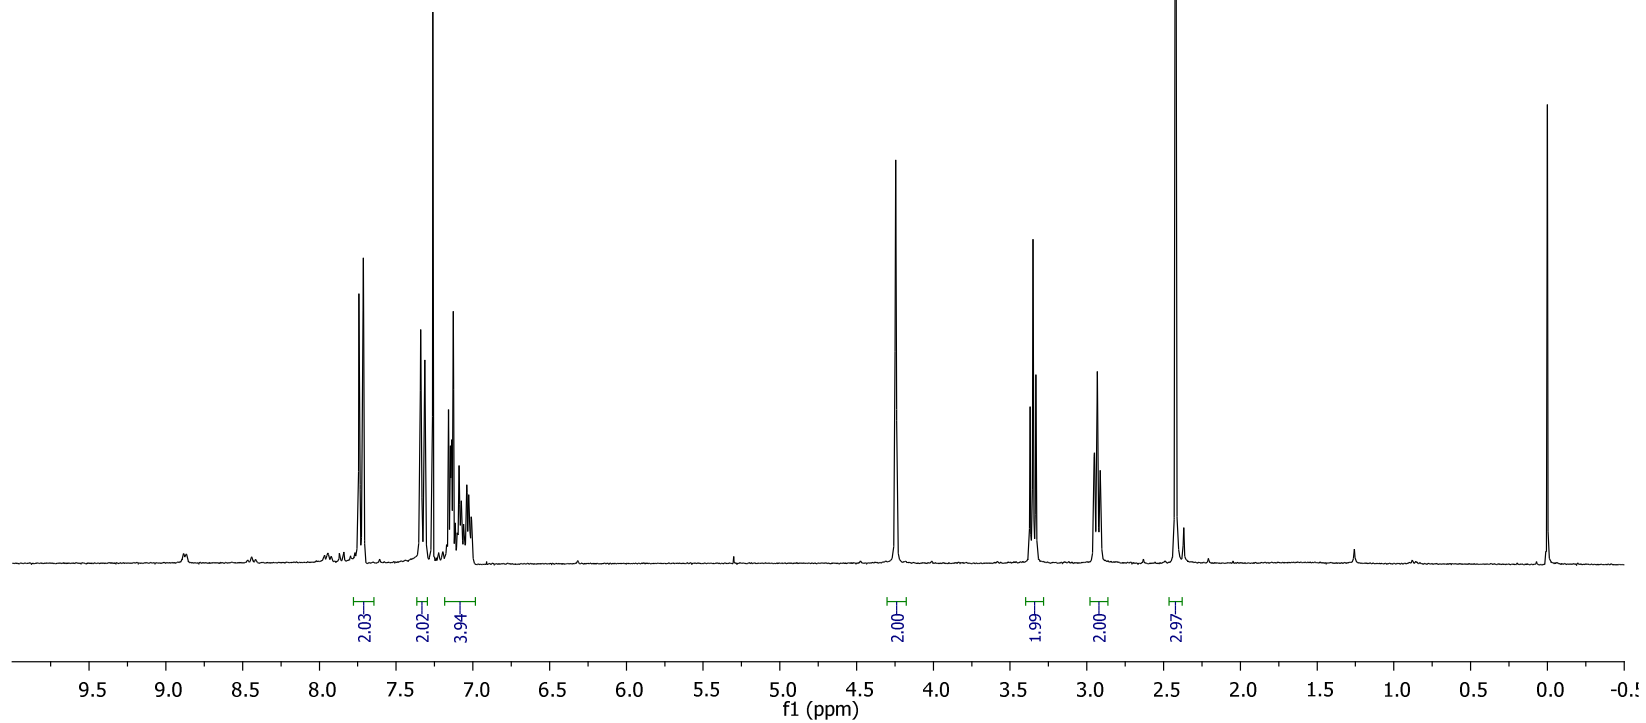

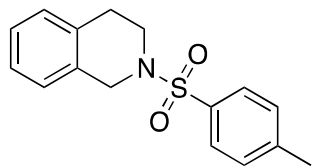

**1d**

$^{13}\text{C}$  NMR (75 MHz,  $\text{CDCl}_3$ )

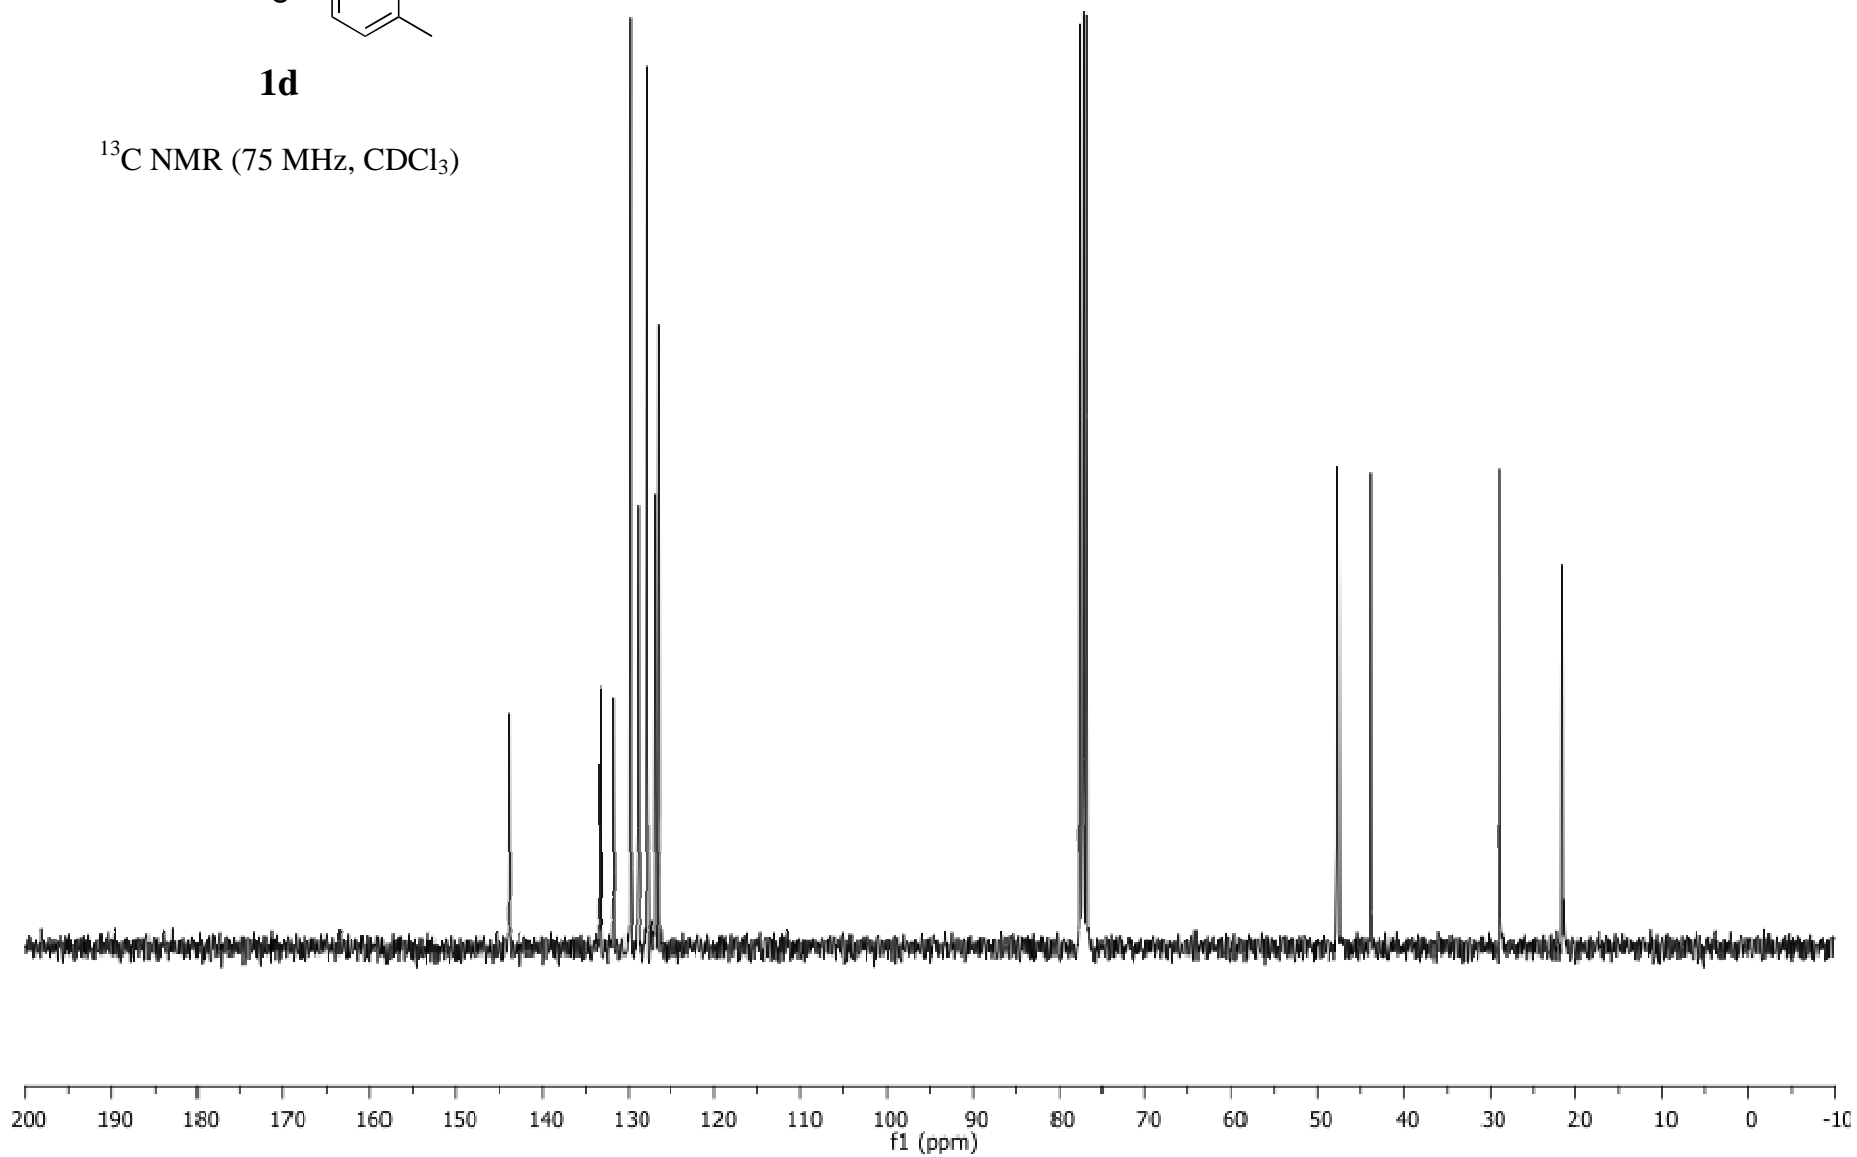



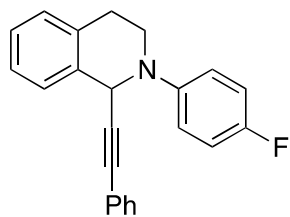

**3a**

$^1\text{H NMR}$  (300 MHz,  $\text{CDCl}_3$ )

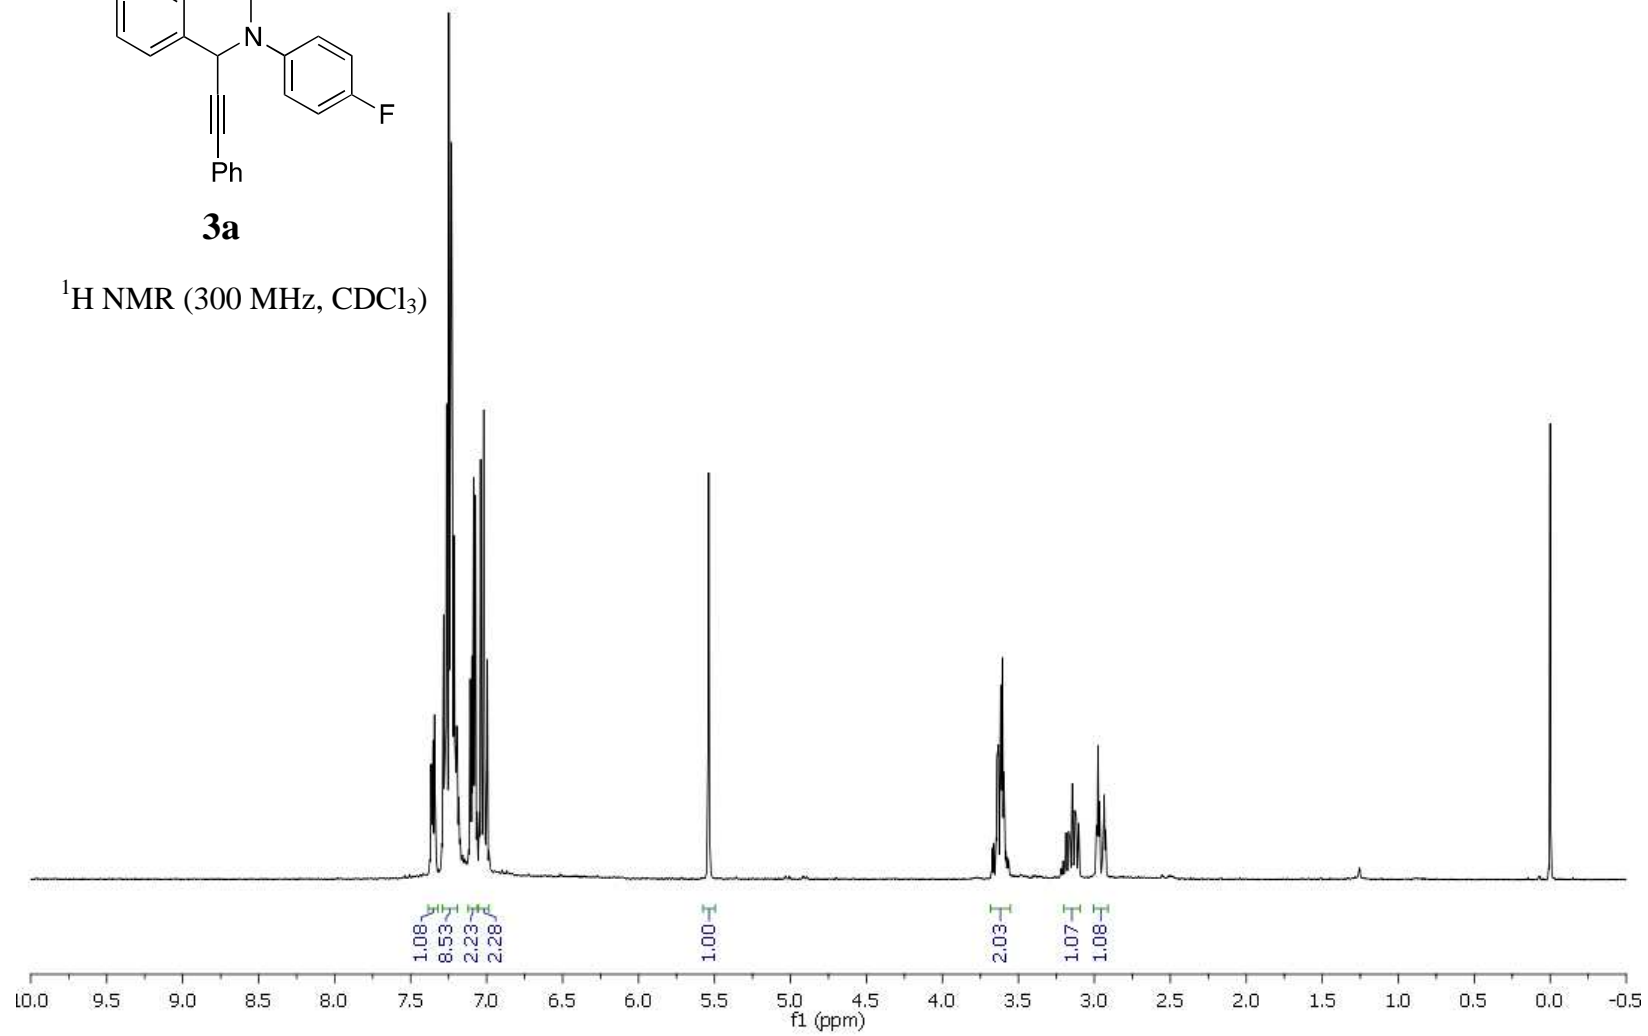

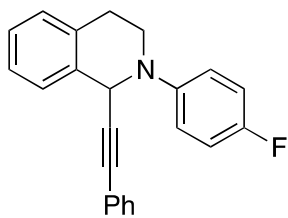

**3a**

$^{13}\text{C}$  NMR (75 MHz,  $\text{CDCl}_3$ )

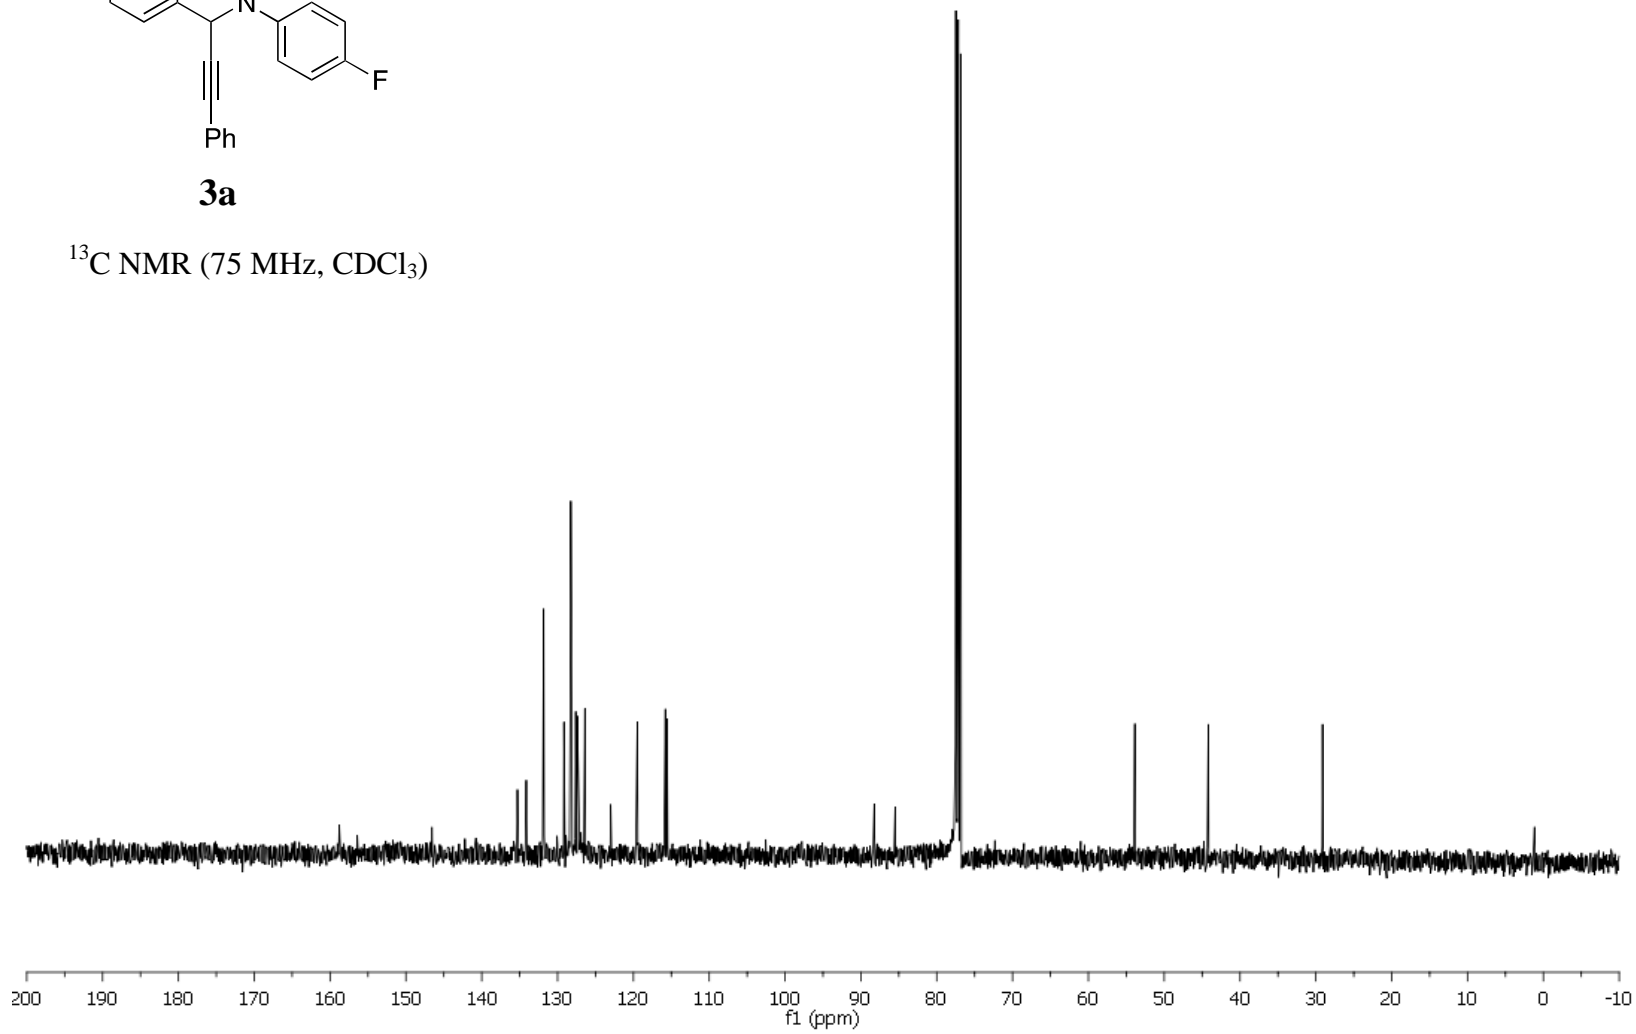

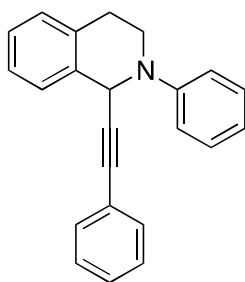

**3b**

$^1\text{H}$  NMR (300 MHz,  $\text{CDCl}_3$ )

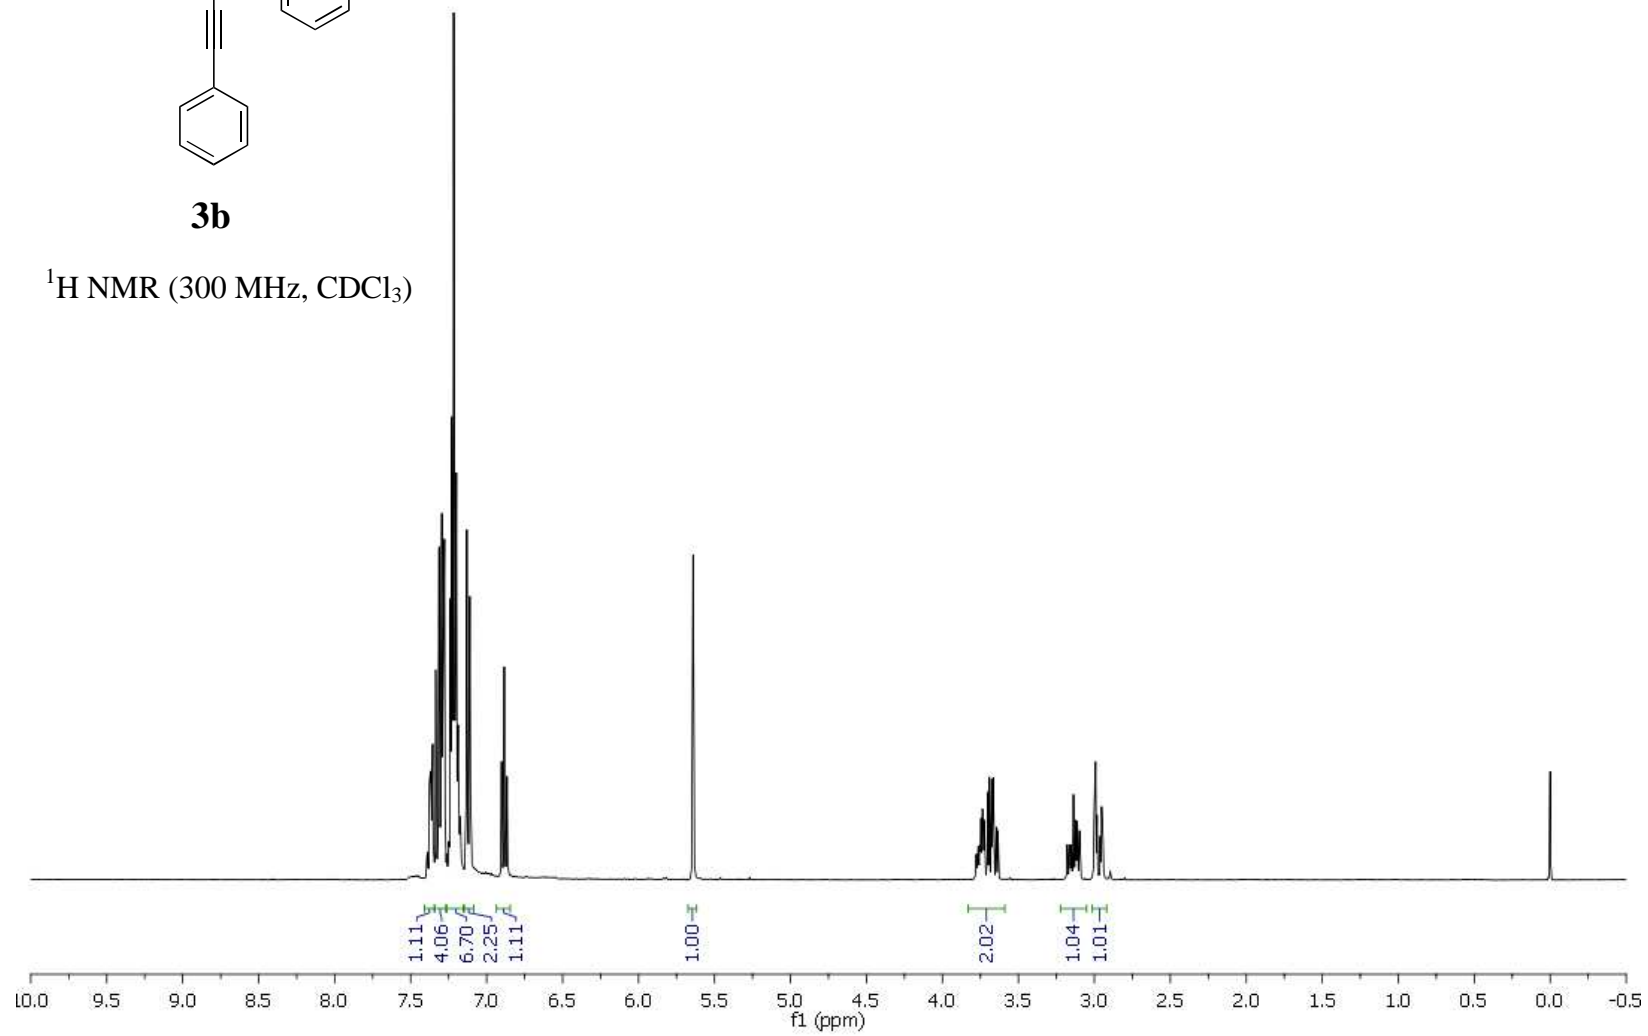

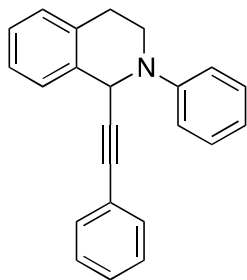

**3b**

$^{13}\text{C}$  NMR (75 MHz,  $\text{CDCl}_3$ )

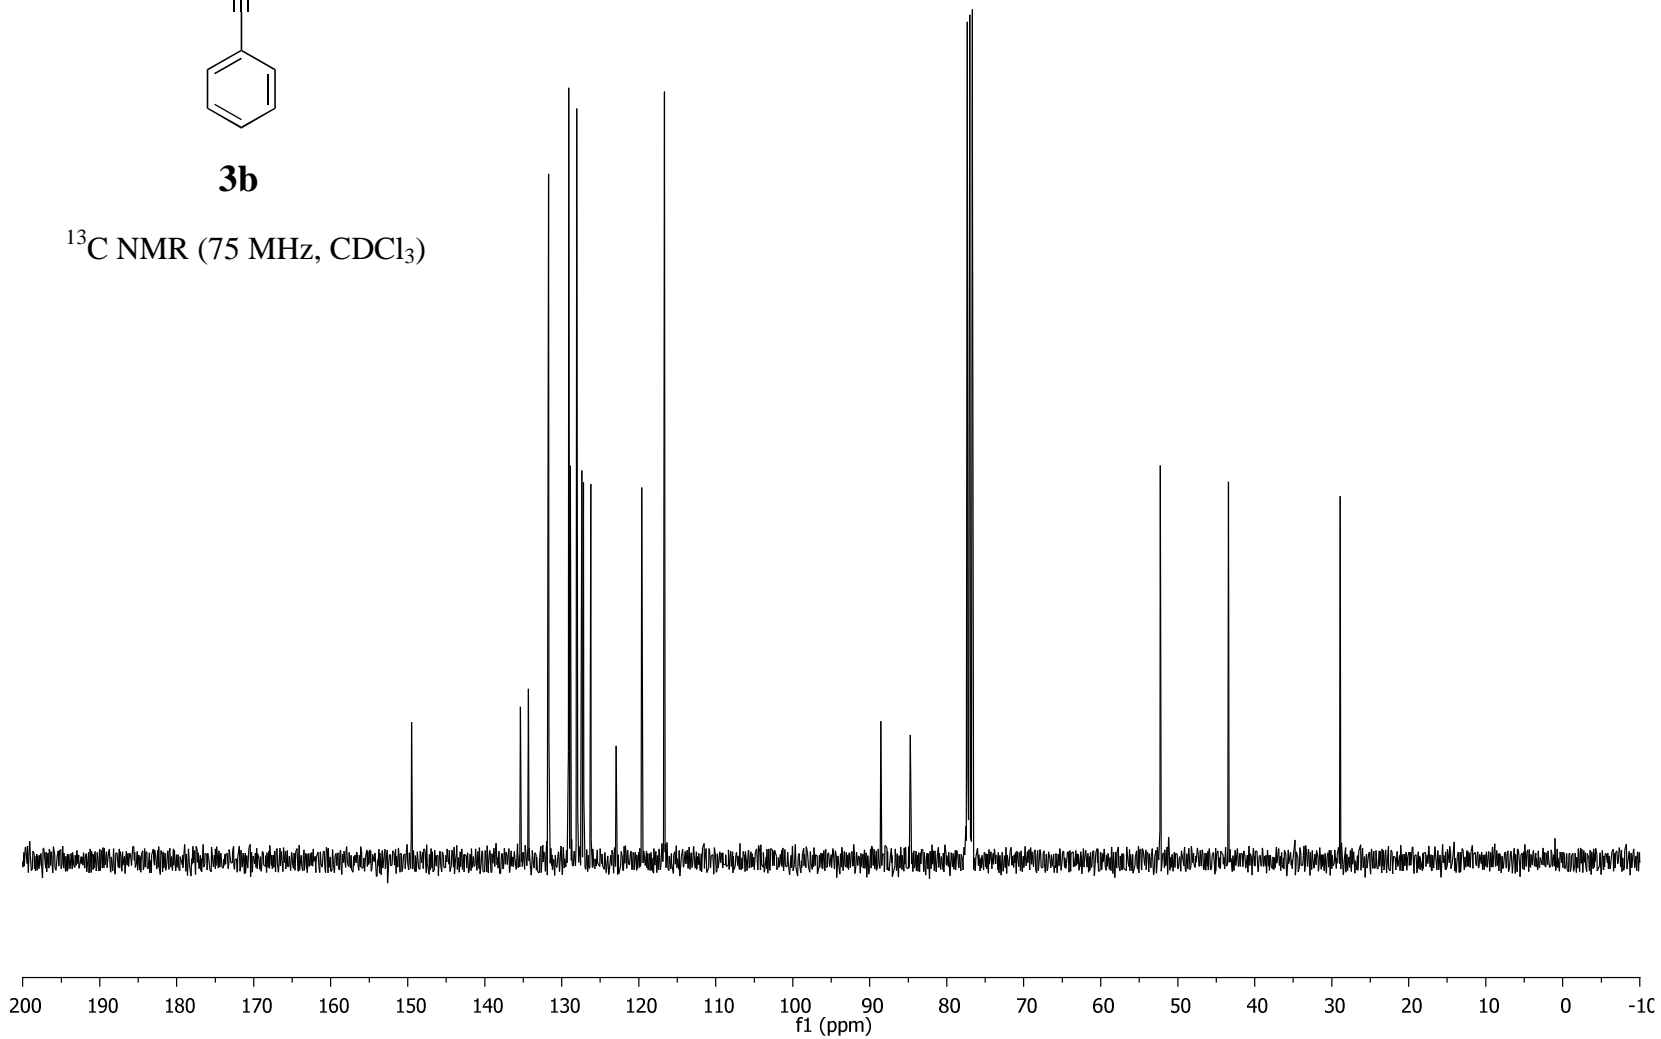

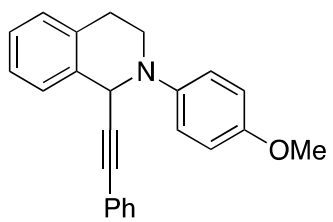

**3c**

$^1\text{H}$  NMR (300 MHz,  $\text{CDCl}_3$ )

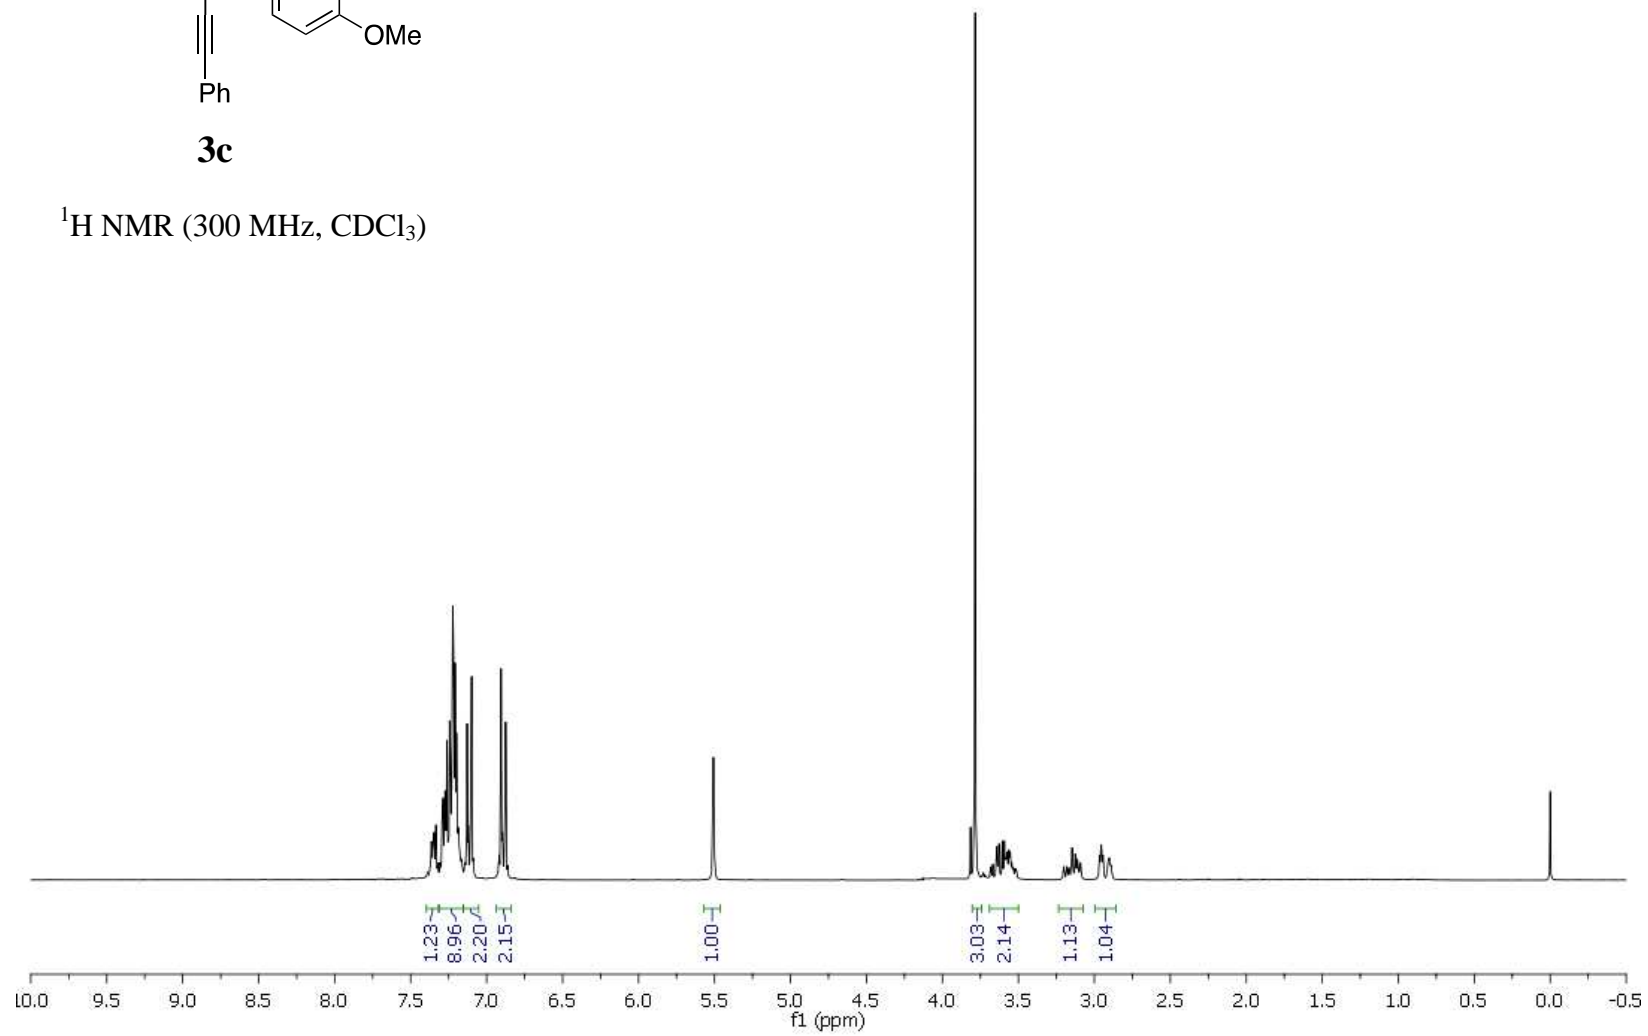

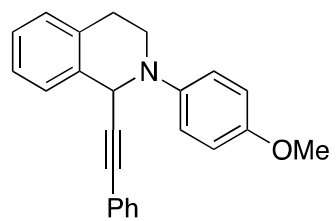

**3c**

$^{13}\text{C}$  NMR (75 MHz,  $\text{CDCl}_3$ )

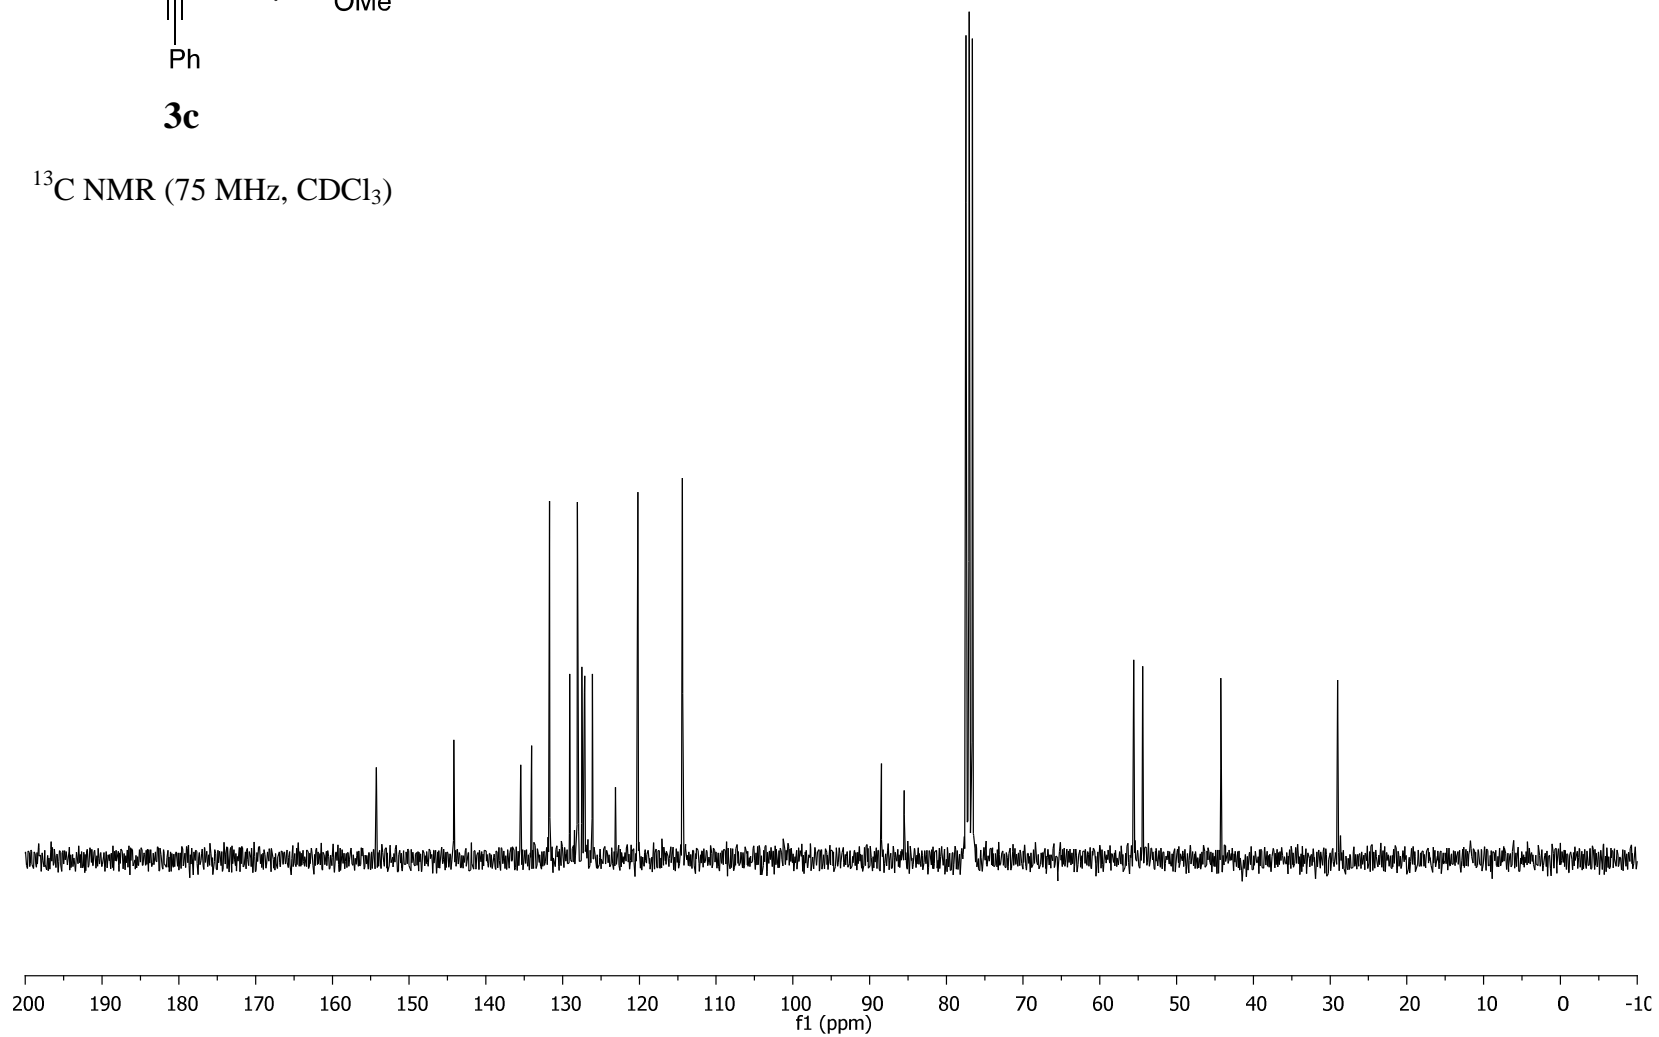

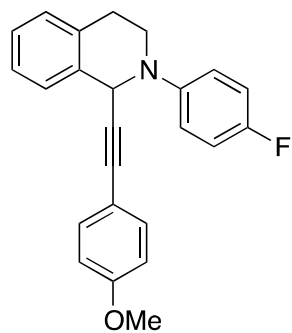

**3f**

<sup>1</sup>H NMR (300 MHz, CDCl<sub>3</sub>)

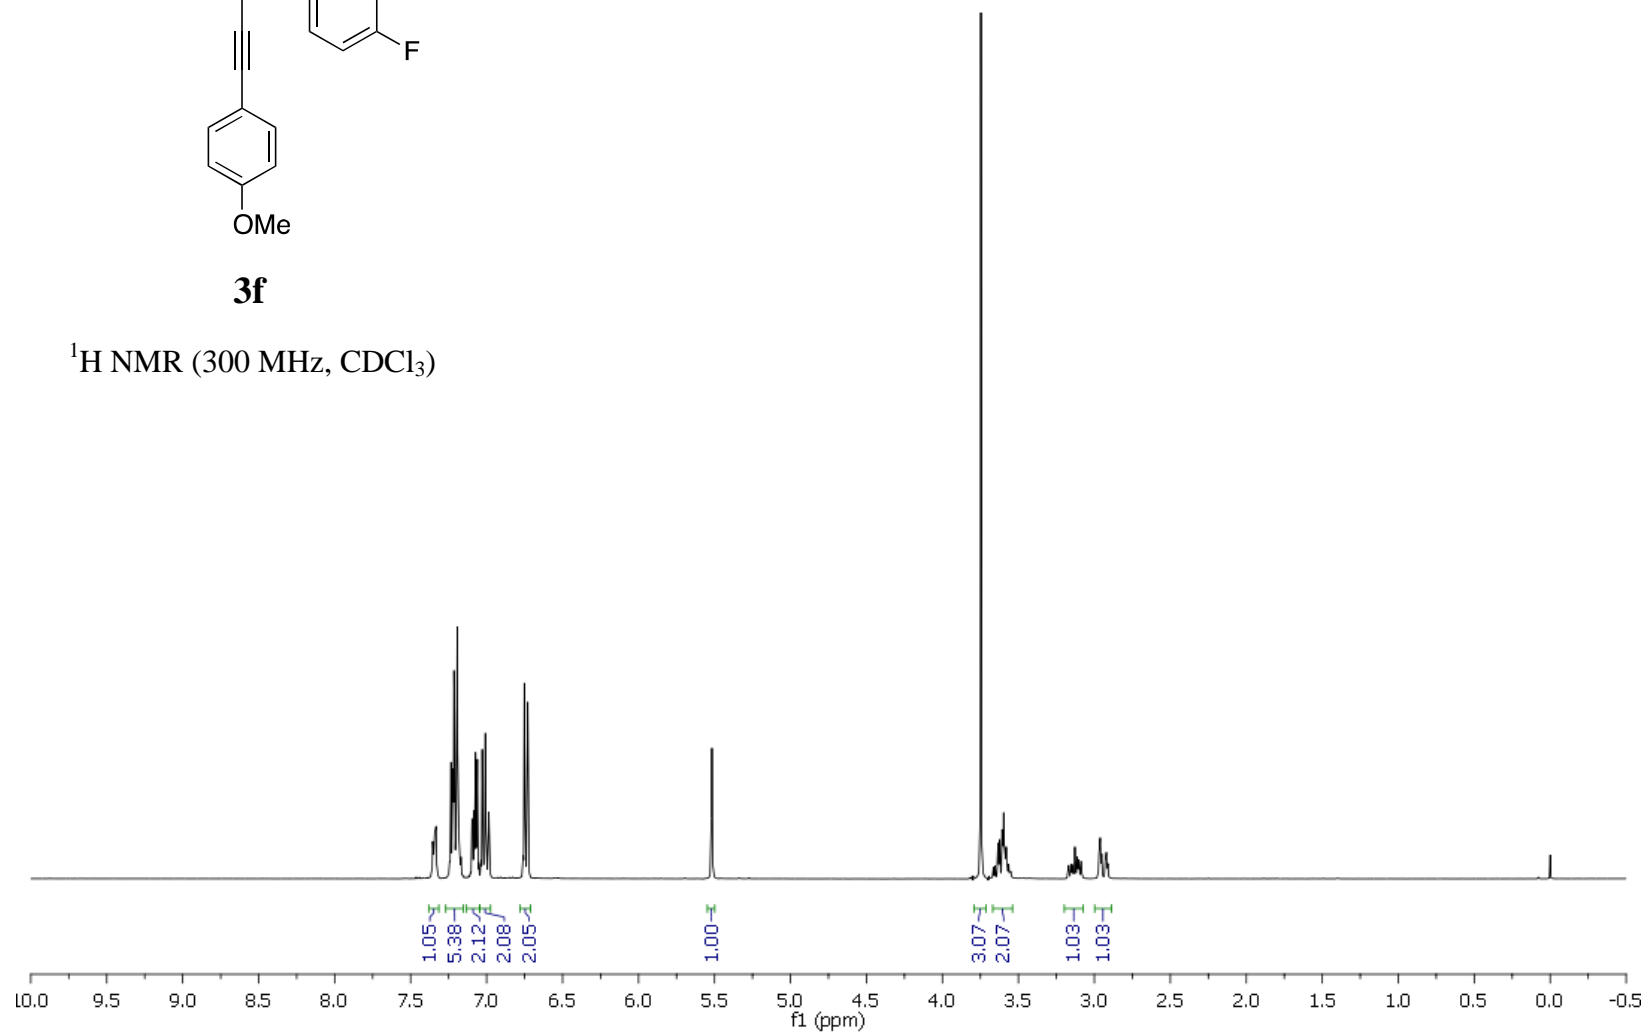

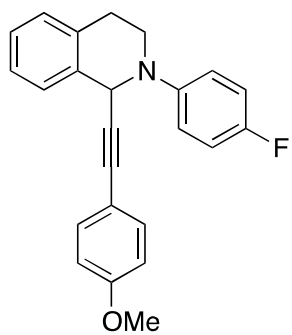

**3f**

$^{13}\text{C}$  NMR (75 MHz,  $\text{CDCl}_3$ )

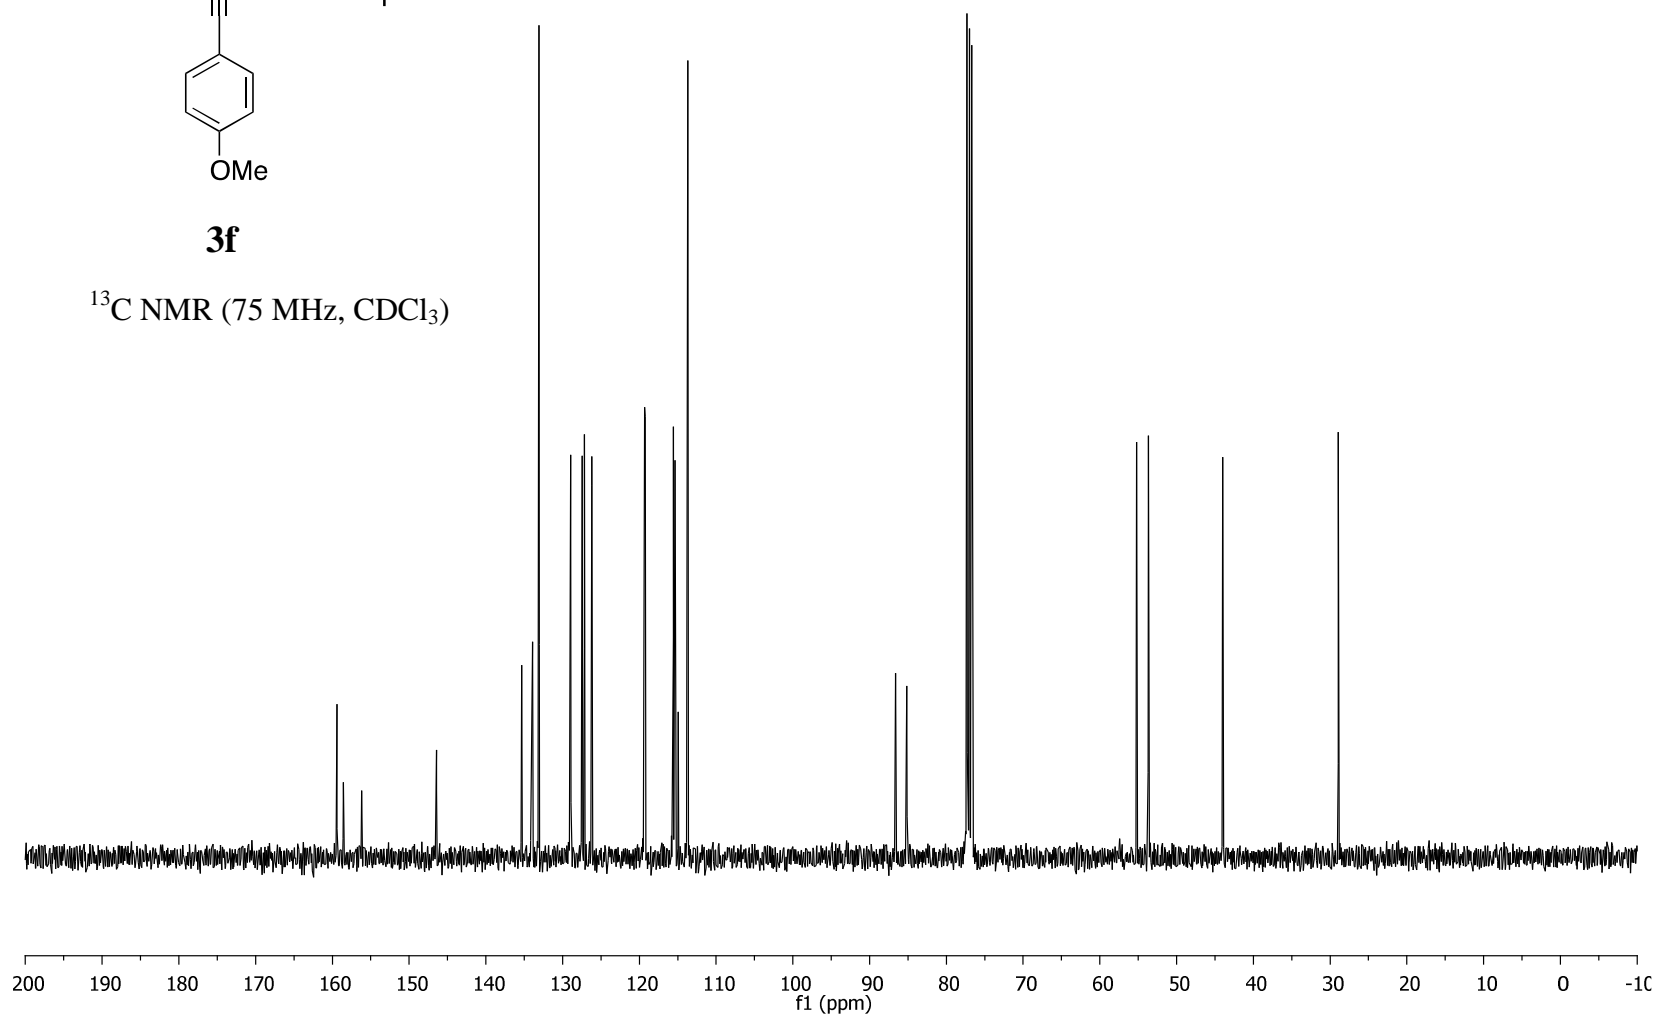



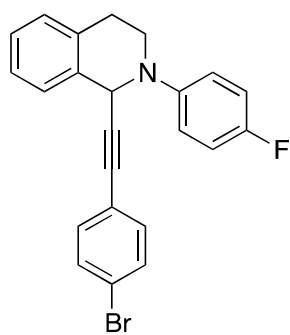

**3g**

$^1\text{H}$  NMR (300 MHz,  $\text{CDCl}_3$ )

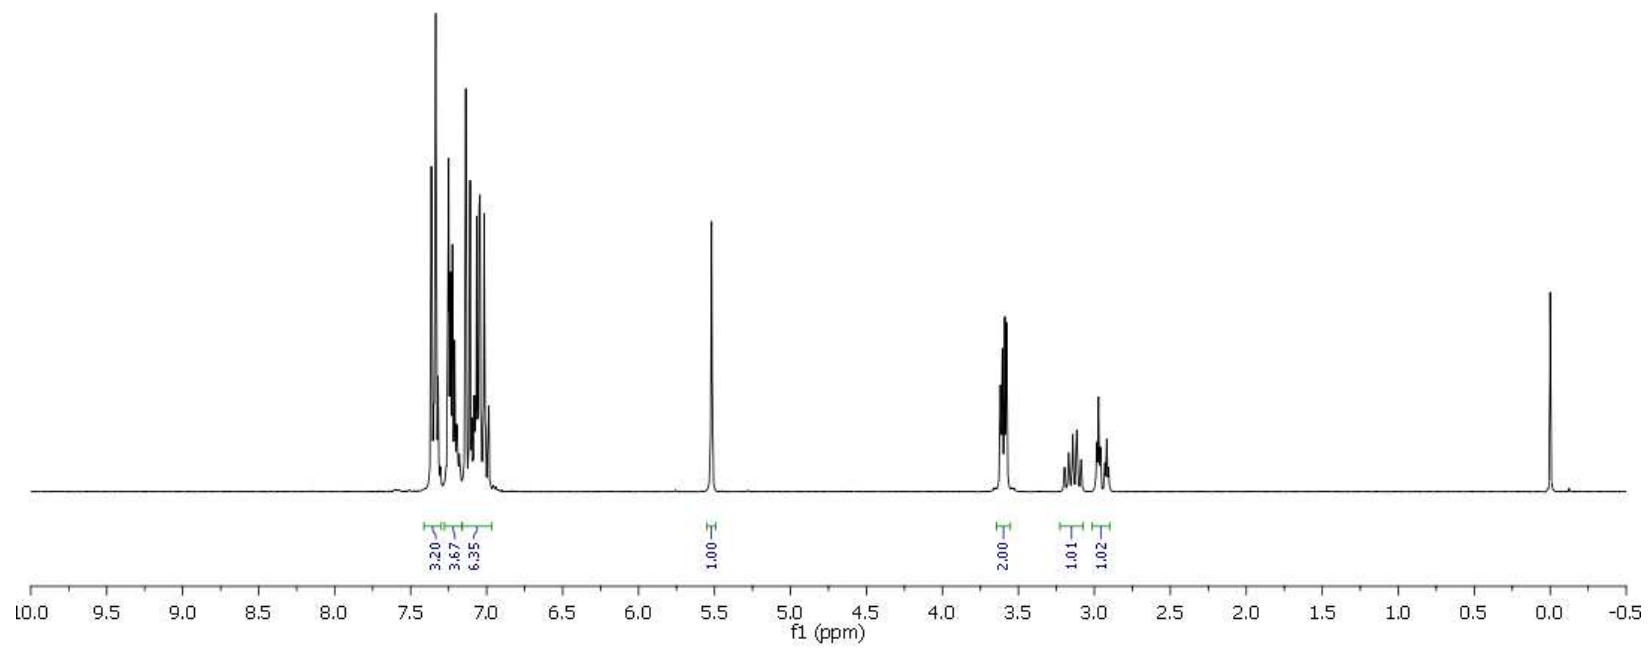

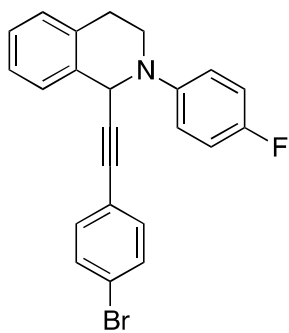

**3g**

$^{13}\text{C}$  NMR (75 MHz,  $\text{CDCl}_3$ )

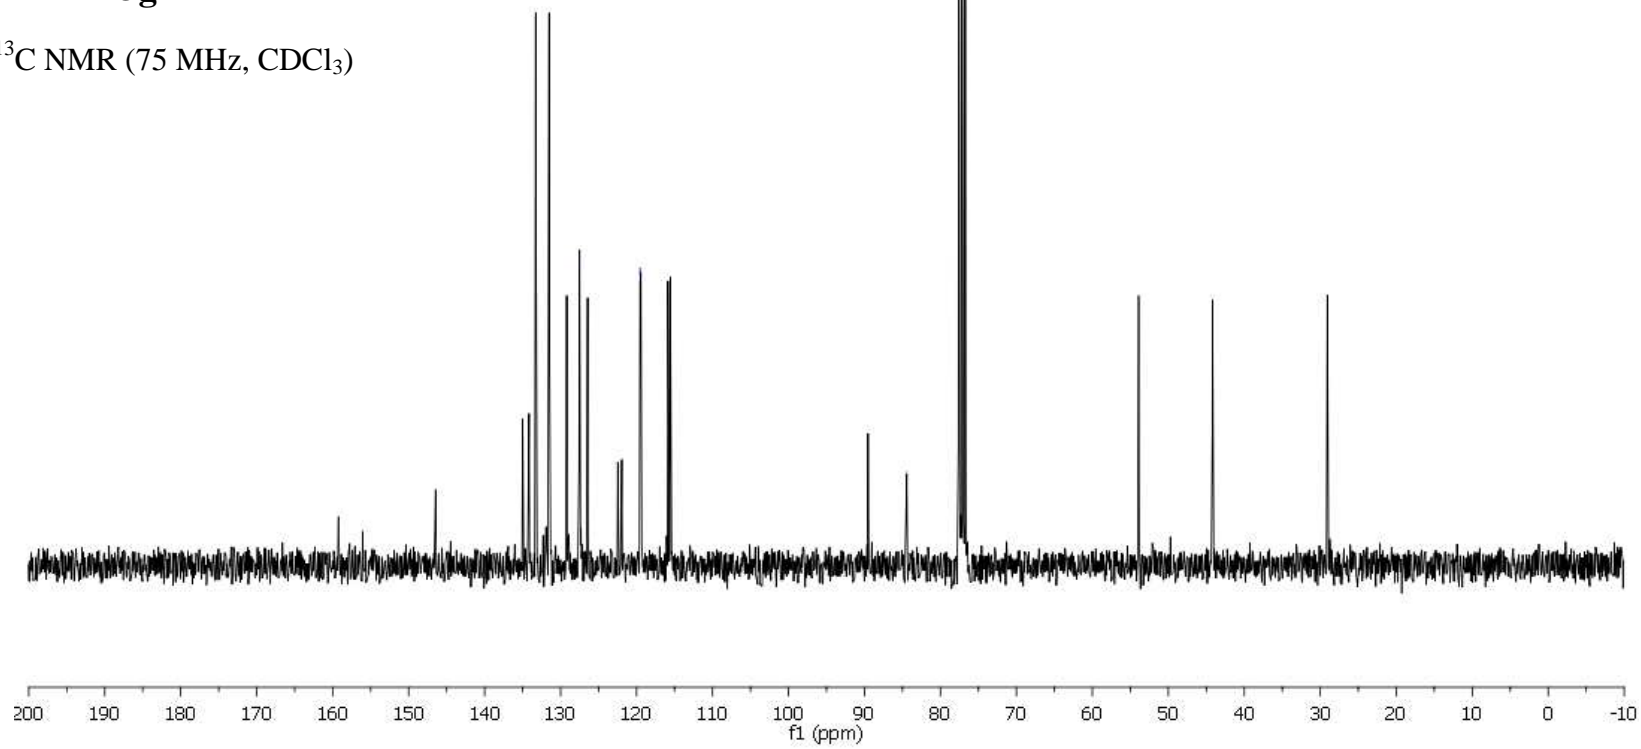

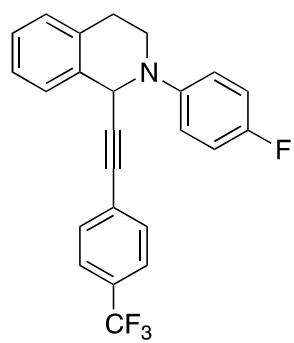

**3h**

$^1\text{H}$  NMR (300 MHz,  $\text{CDCl}_3$ )

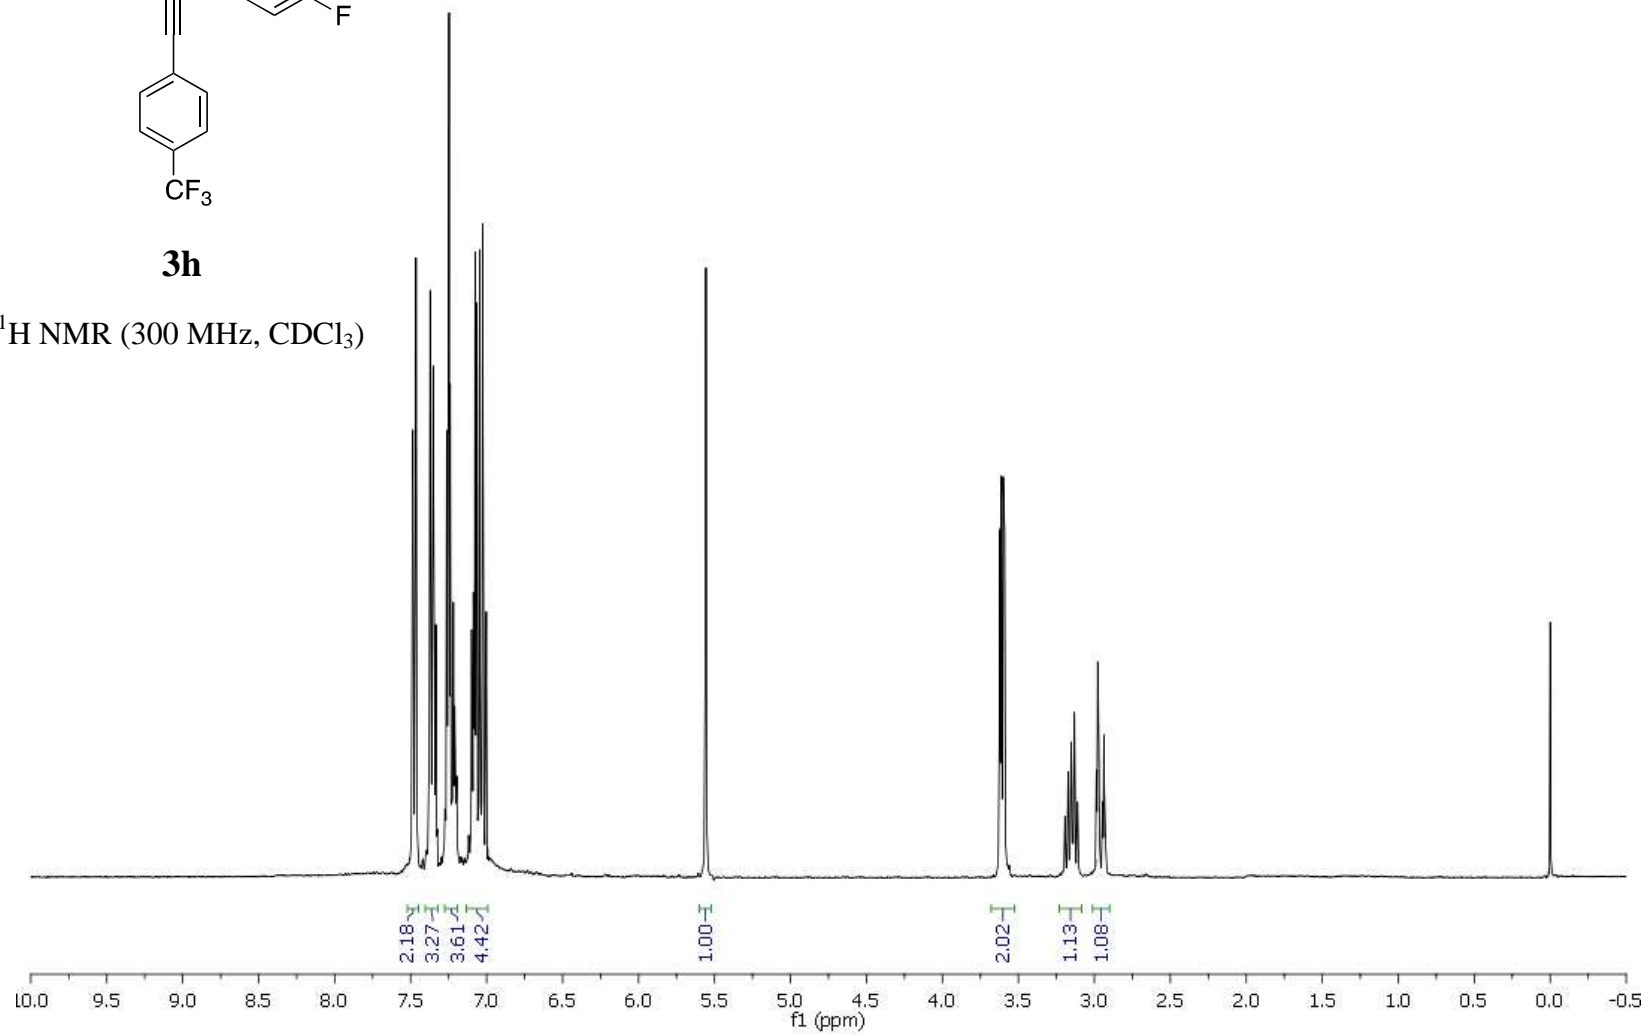

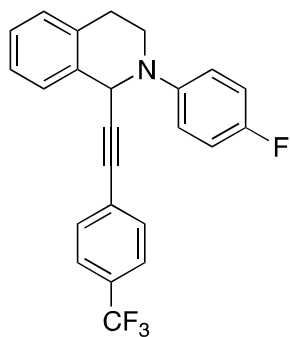

**3h**

$^{13}\text{C}$  NMR (75 MHz,  $\text{CDCl}_3$ )

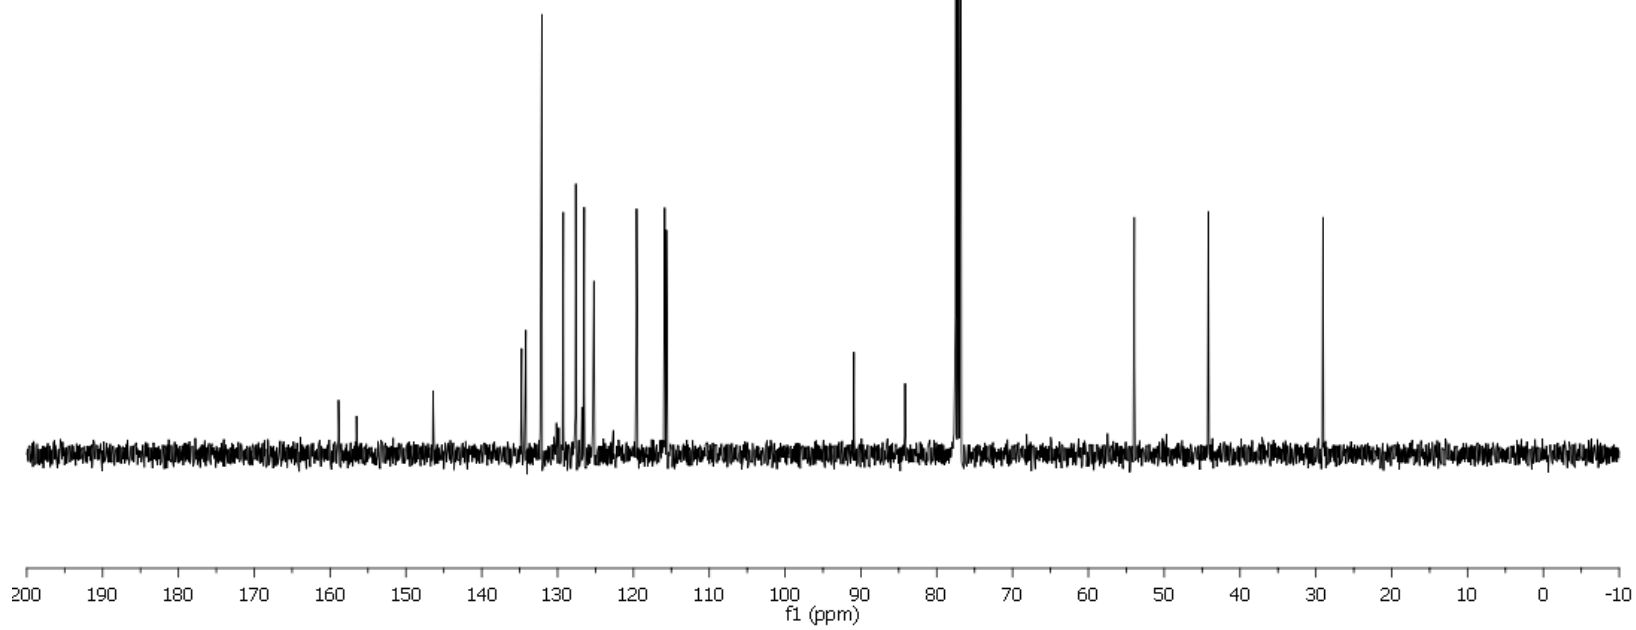

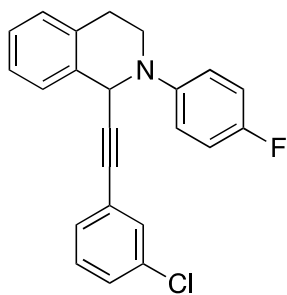

**3i**

<sup>1</sup>H NMR (300 MHz, CDCl<sub>3</sub>)

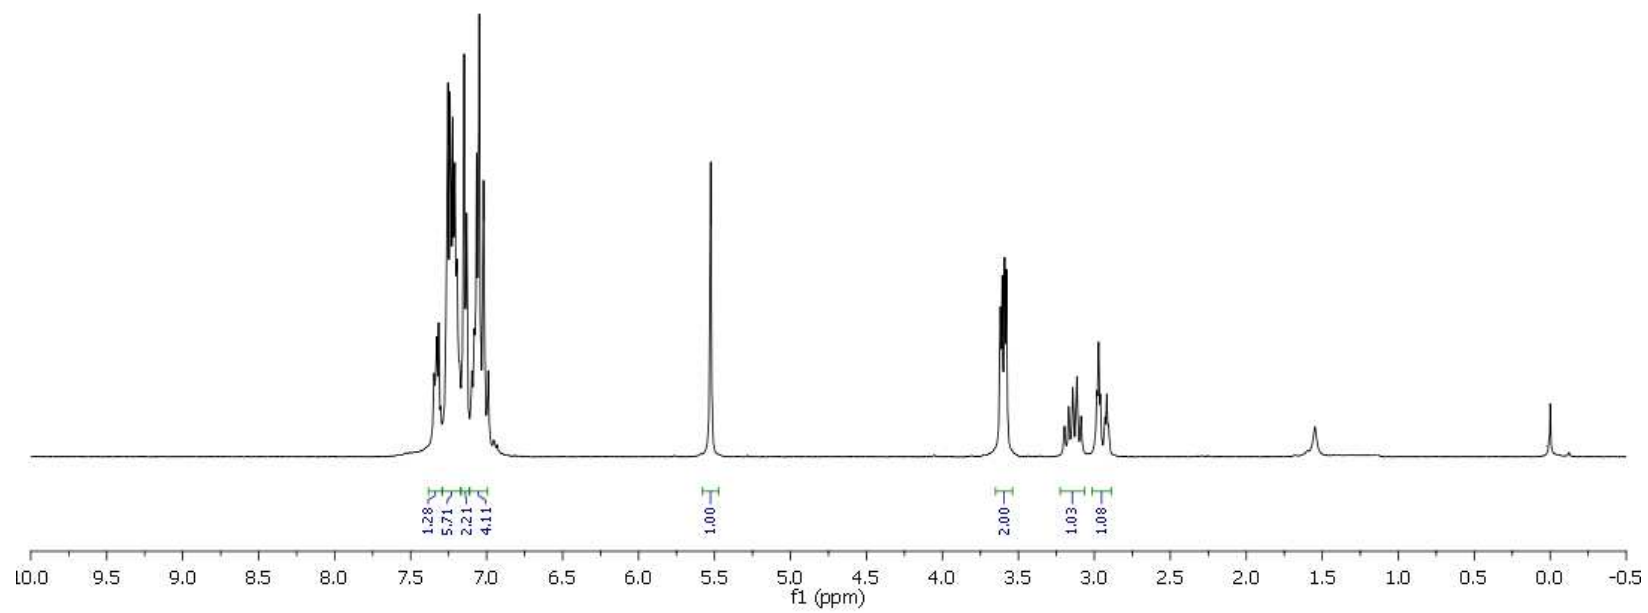

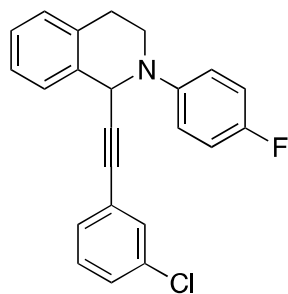

**3i**

$^{13}\text{C}$  NMR (75 MHz,  $\text{CDCl}_3$ )

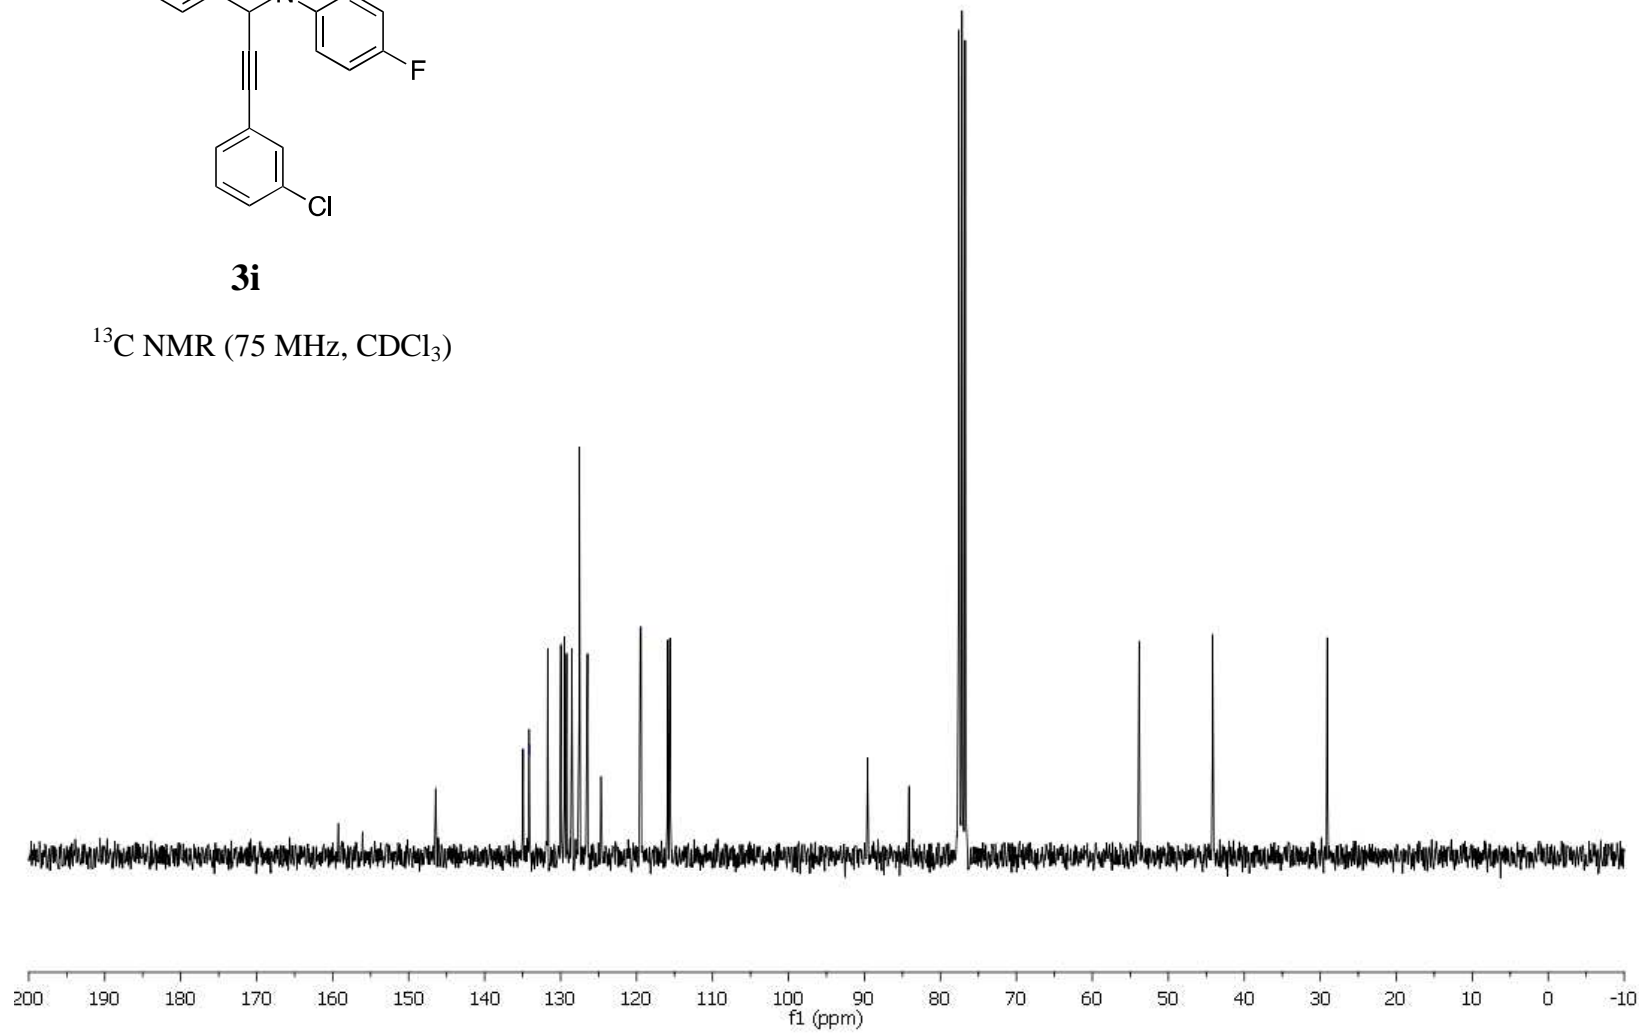

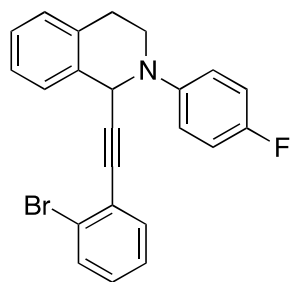

**3j**

$^1\text{H}$  NMR (300 MHz,  $\text{CDCl}_3$ )

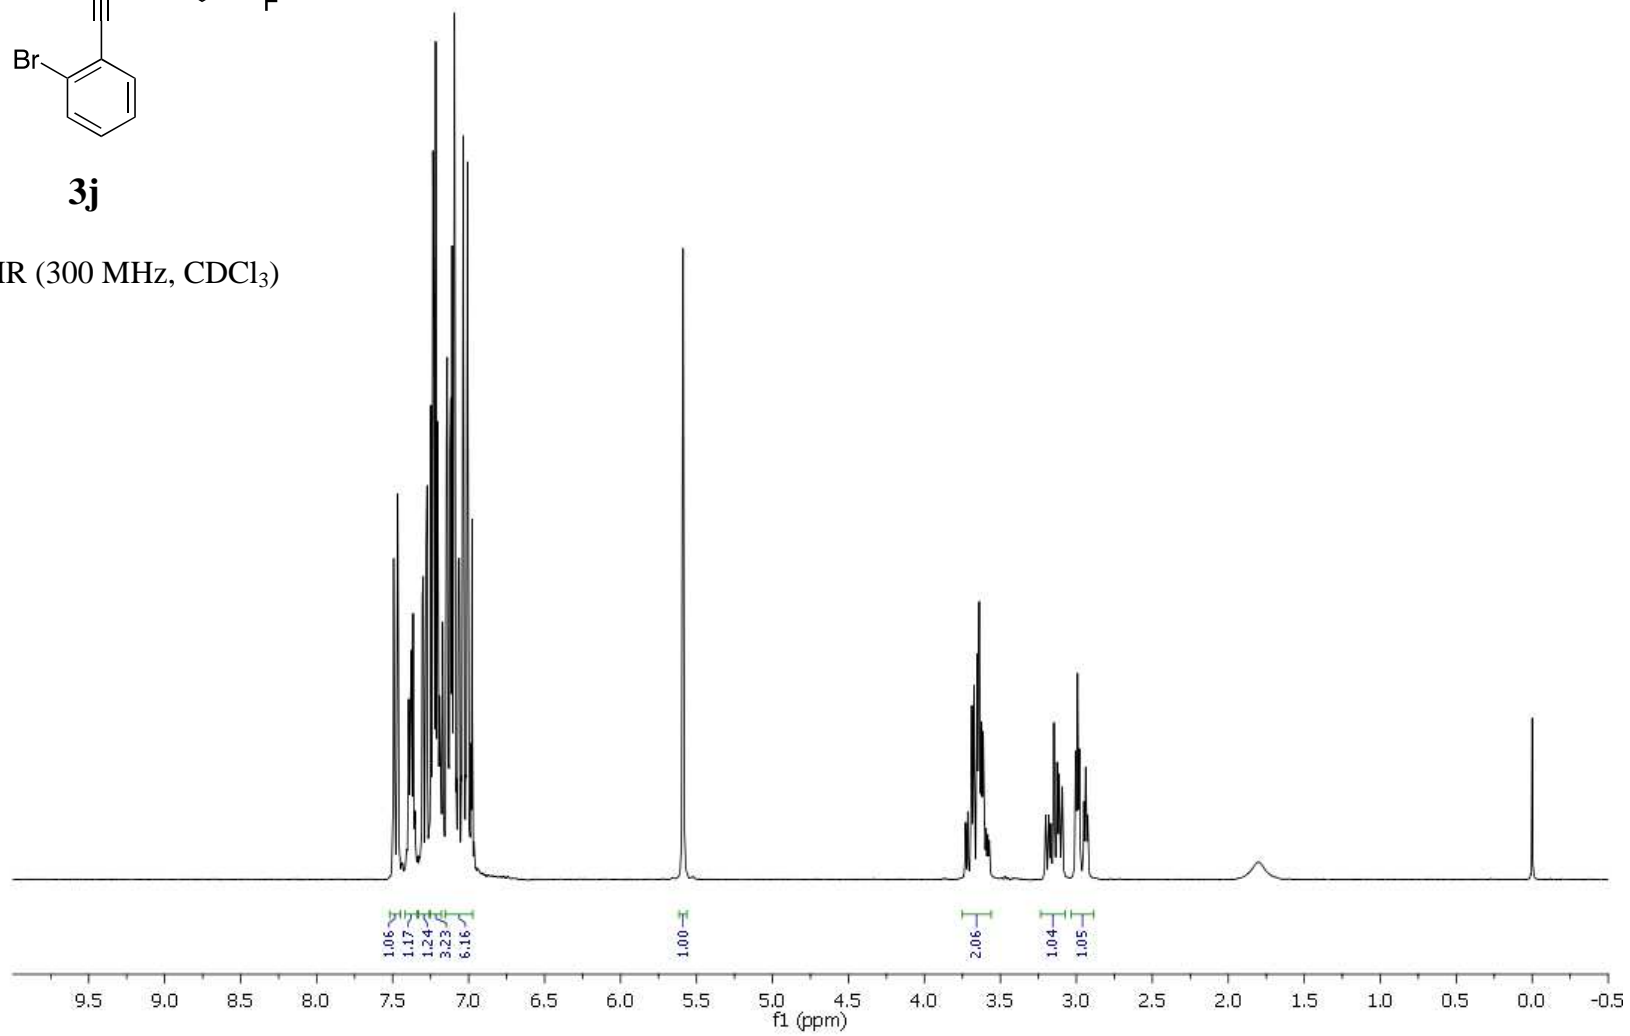

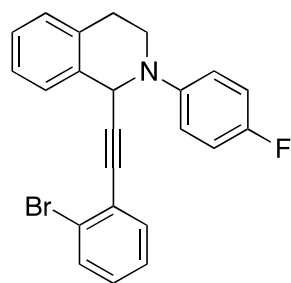

**3j**

$^{13}\text{C}$  NMR (75 MHz,  $\text{CDCl}_3$ )

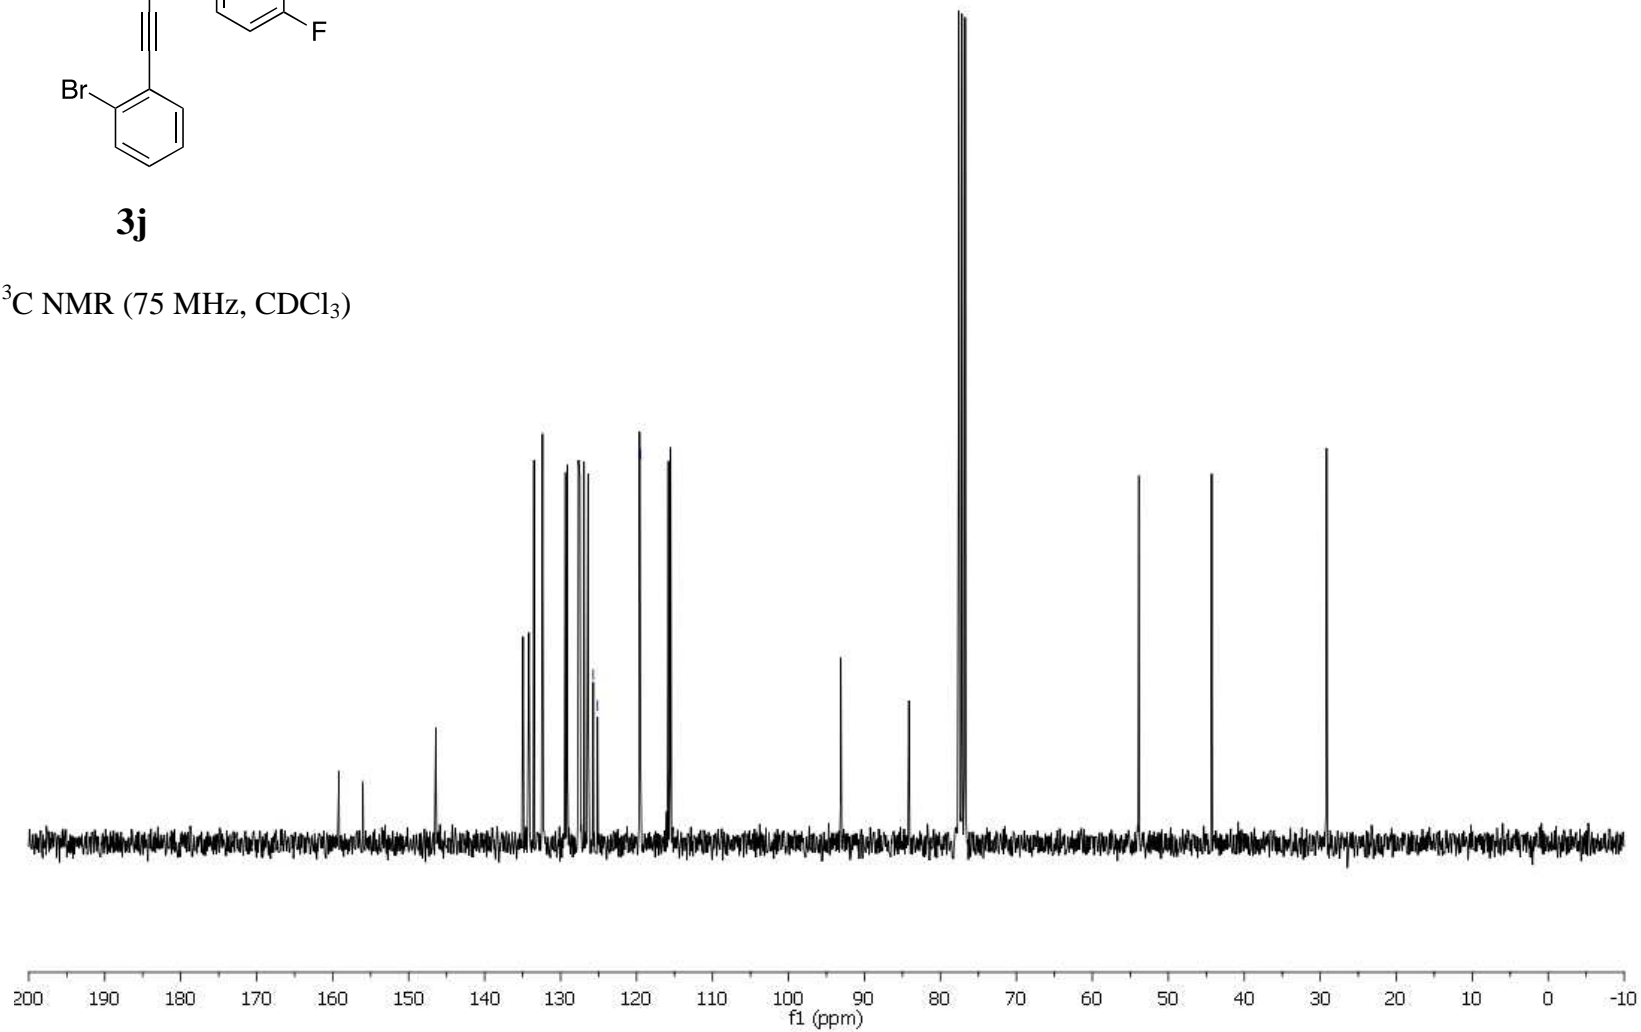



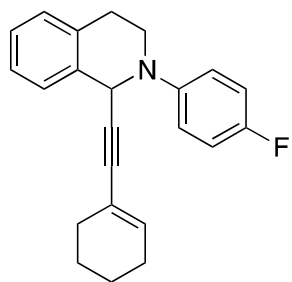

**3k**

$^1\text{H}$  NMR (300 MHz,  $\text{CDCl}_3$ )

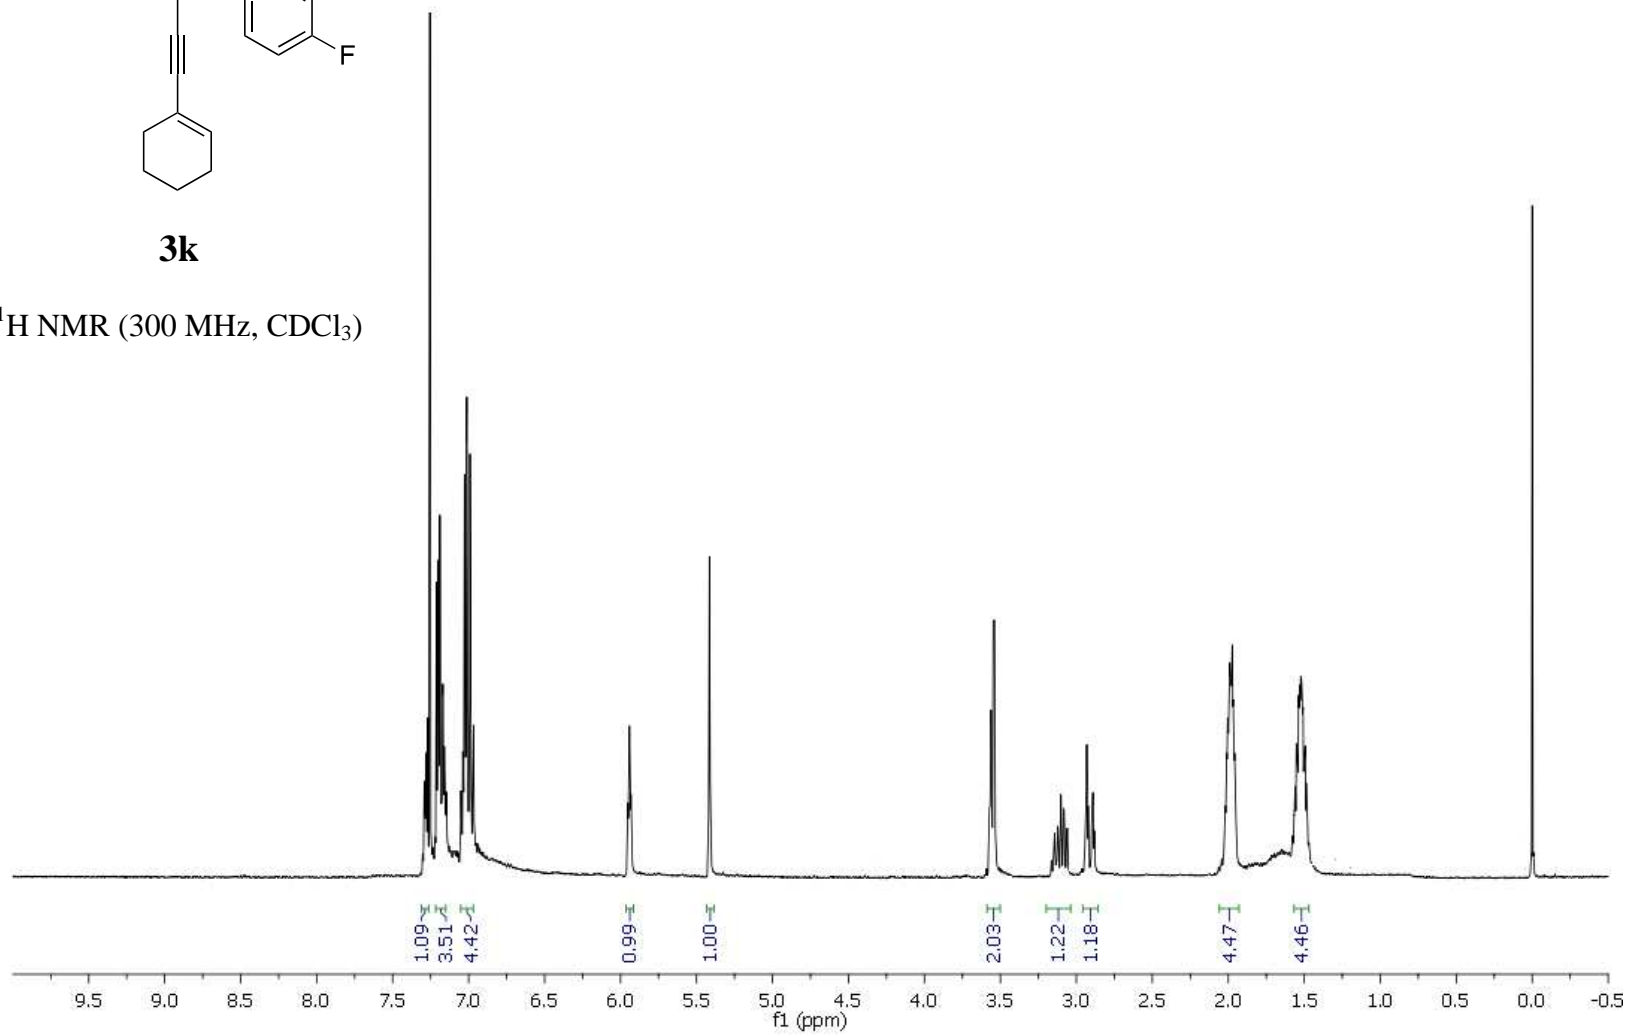

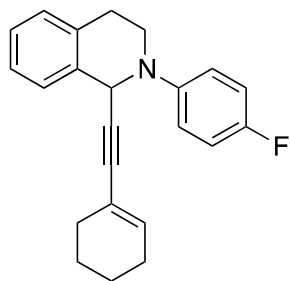

**3k**

$^{13}\text{C}$  NMR (75 MHz,  $\text{CDCl}_3$ )

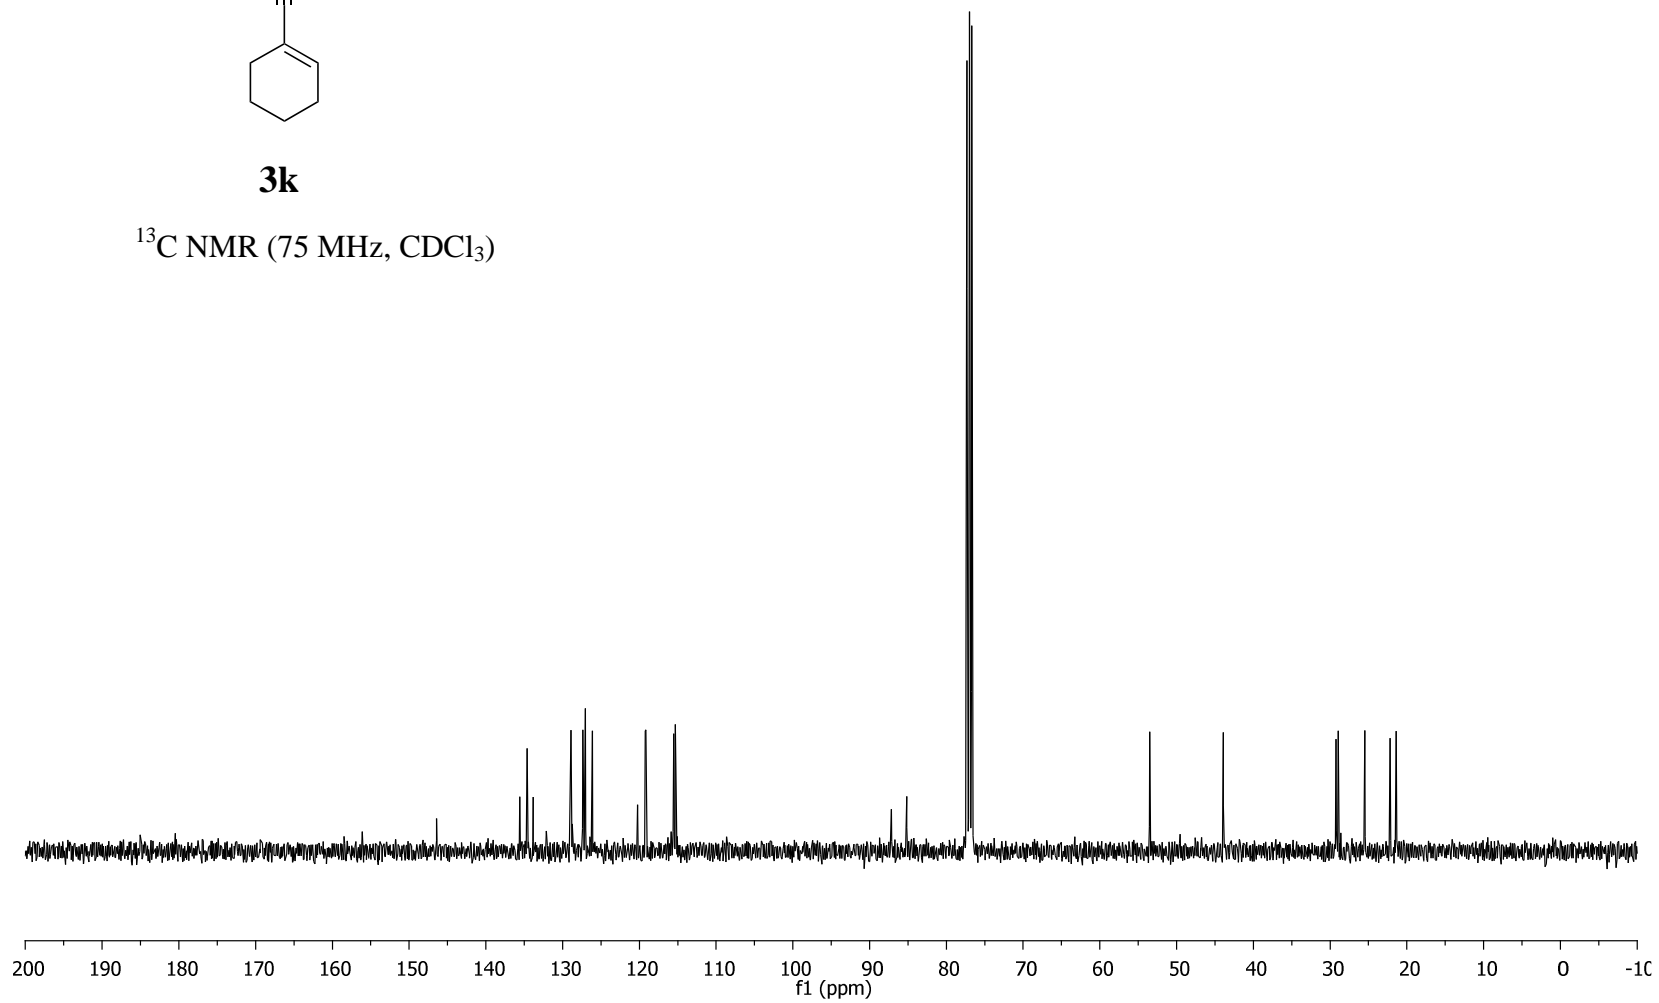

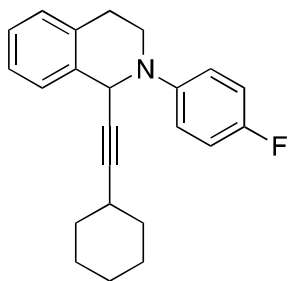

**3l**

<sup>1</sup>H NMR (300 MHz, CDCl<sub>3</sub>)

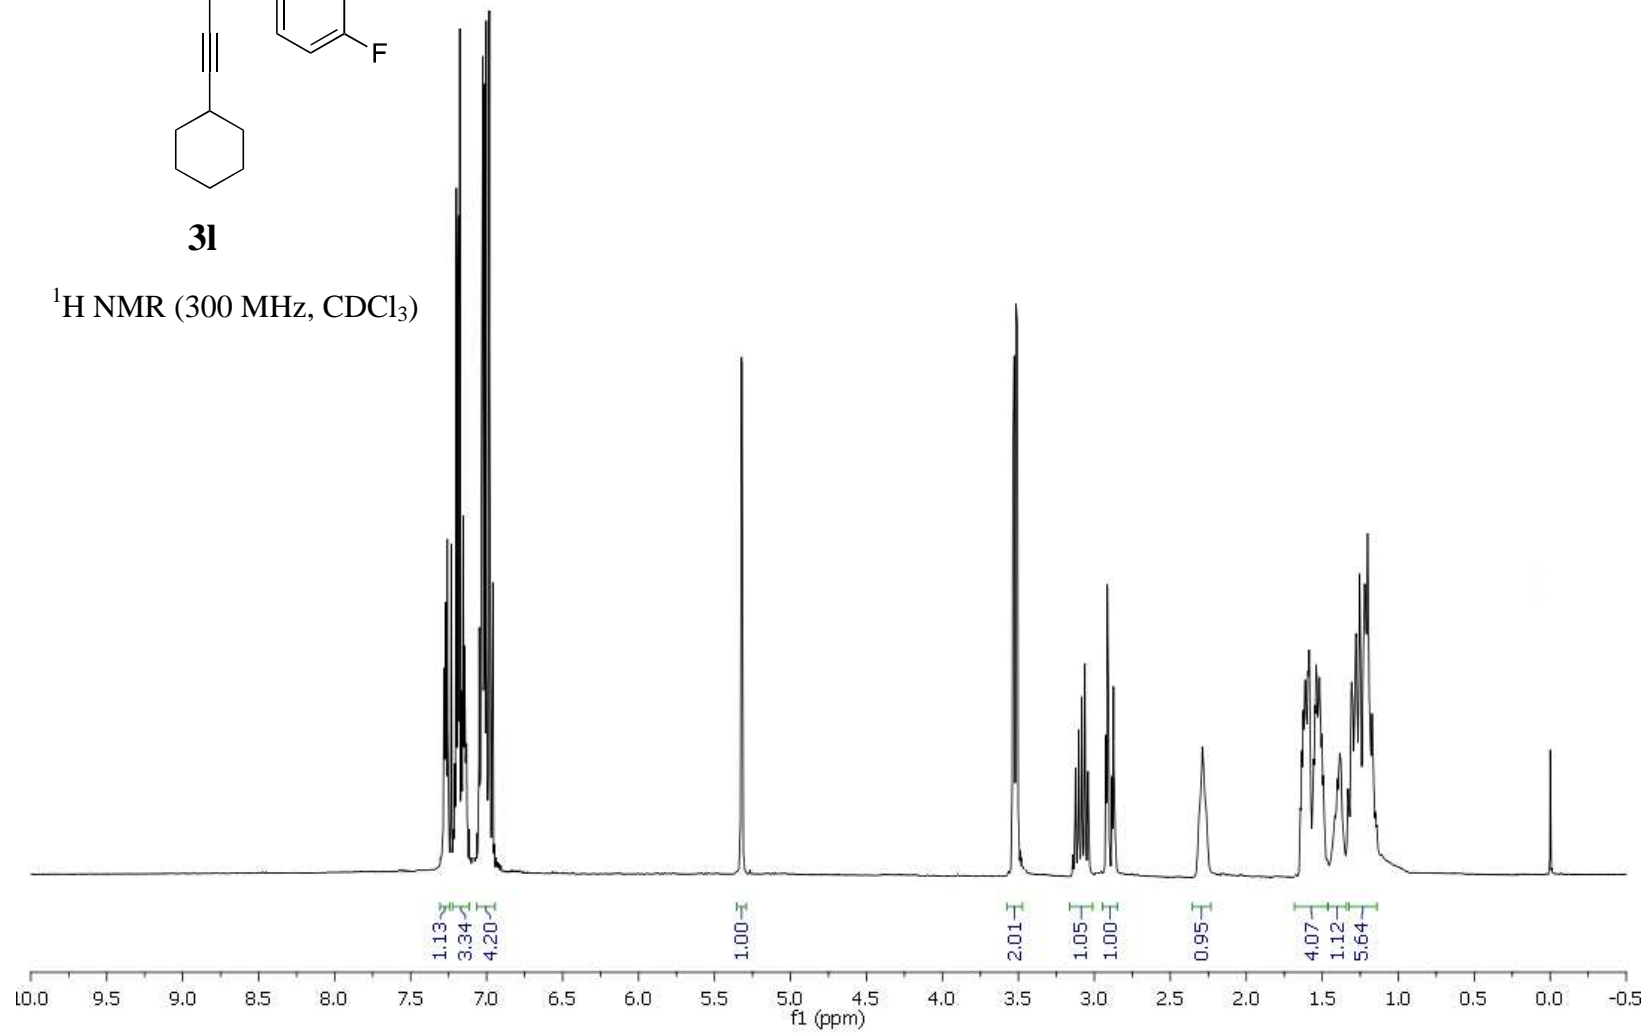

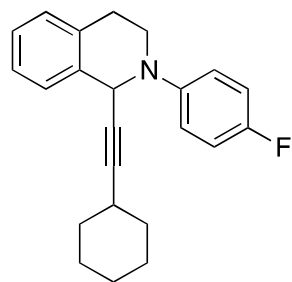

**31**

$^{13}\text{C}$  NMR (75 MHz,  $\text{CDCl}_3$ )

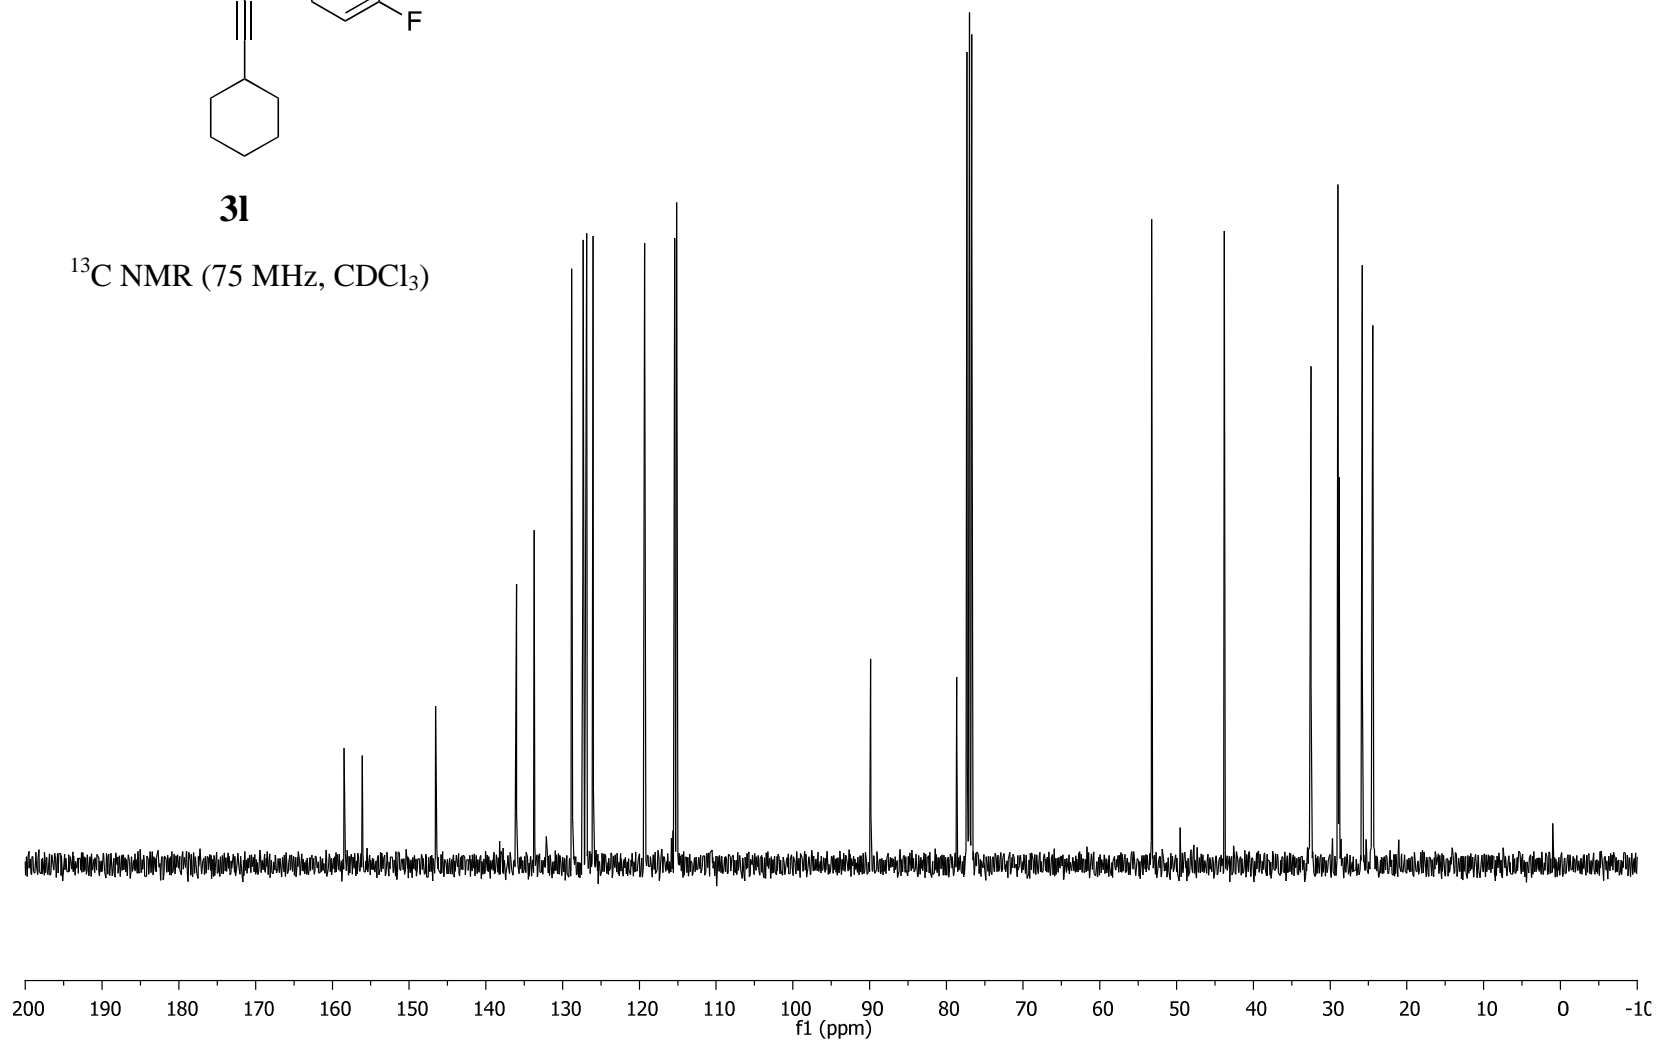

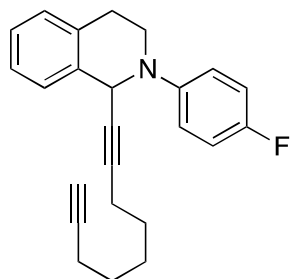

**3m**

<sup>1</sup>H NMR (300 MHz, CDCl<sub>3</sub>)

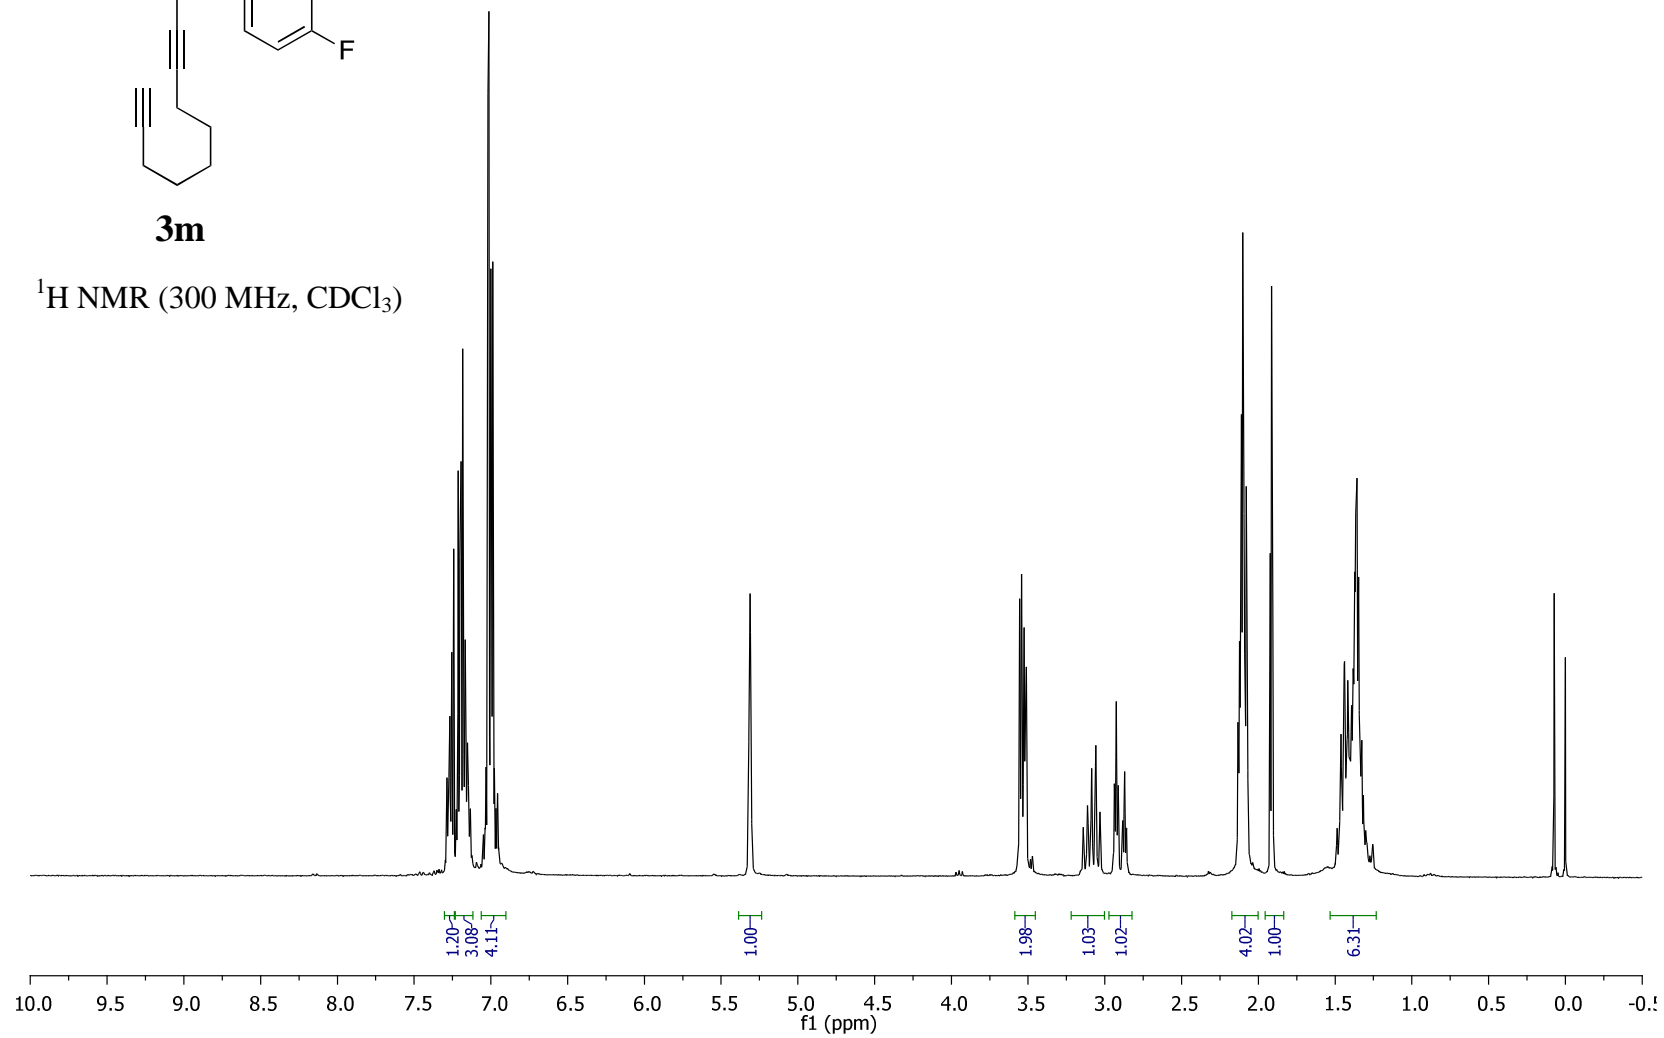

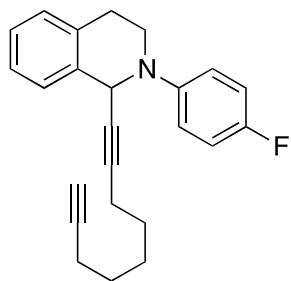

**3m**

$^{13}\text{C}$  NMR (75 MHz,  $\text{CDCl}_3$ )

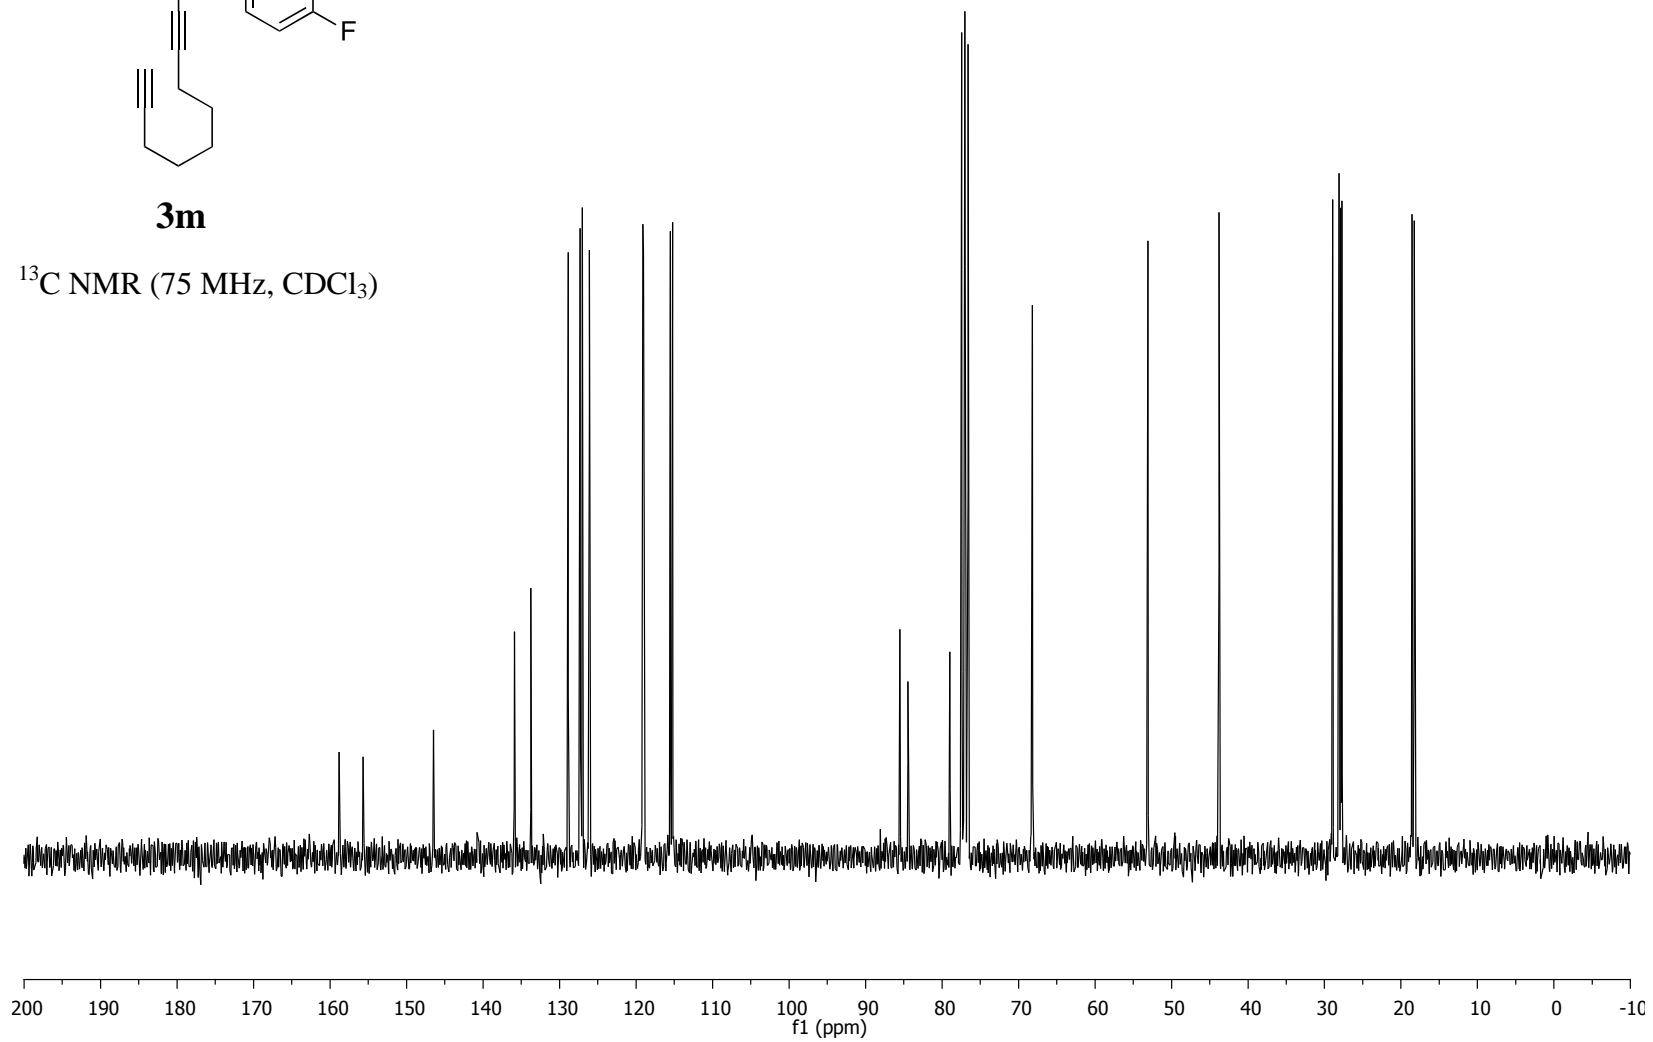

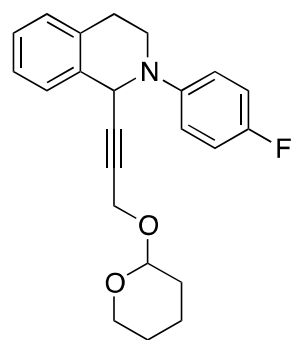

**3n**

$^1\text{H}$  NMR (300 MHz,  $\text{CDCl}_3$ )

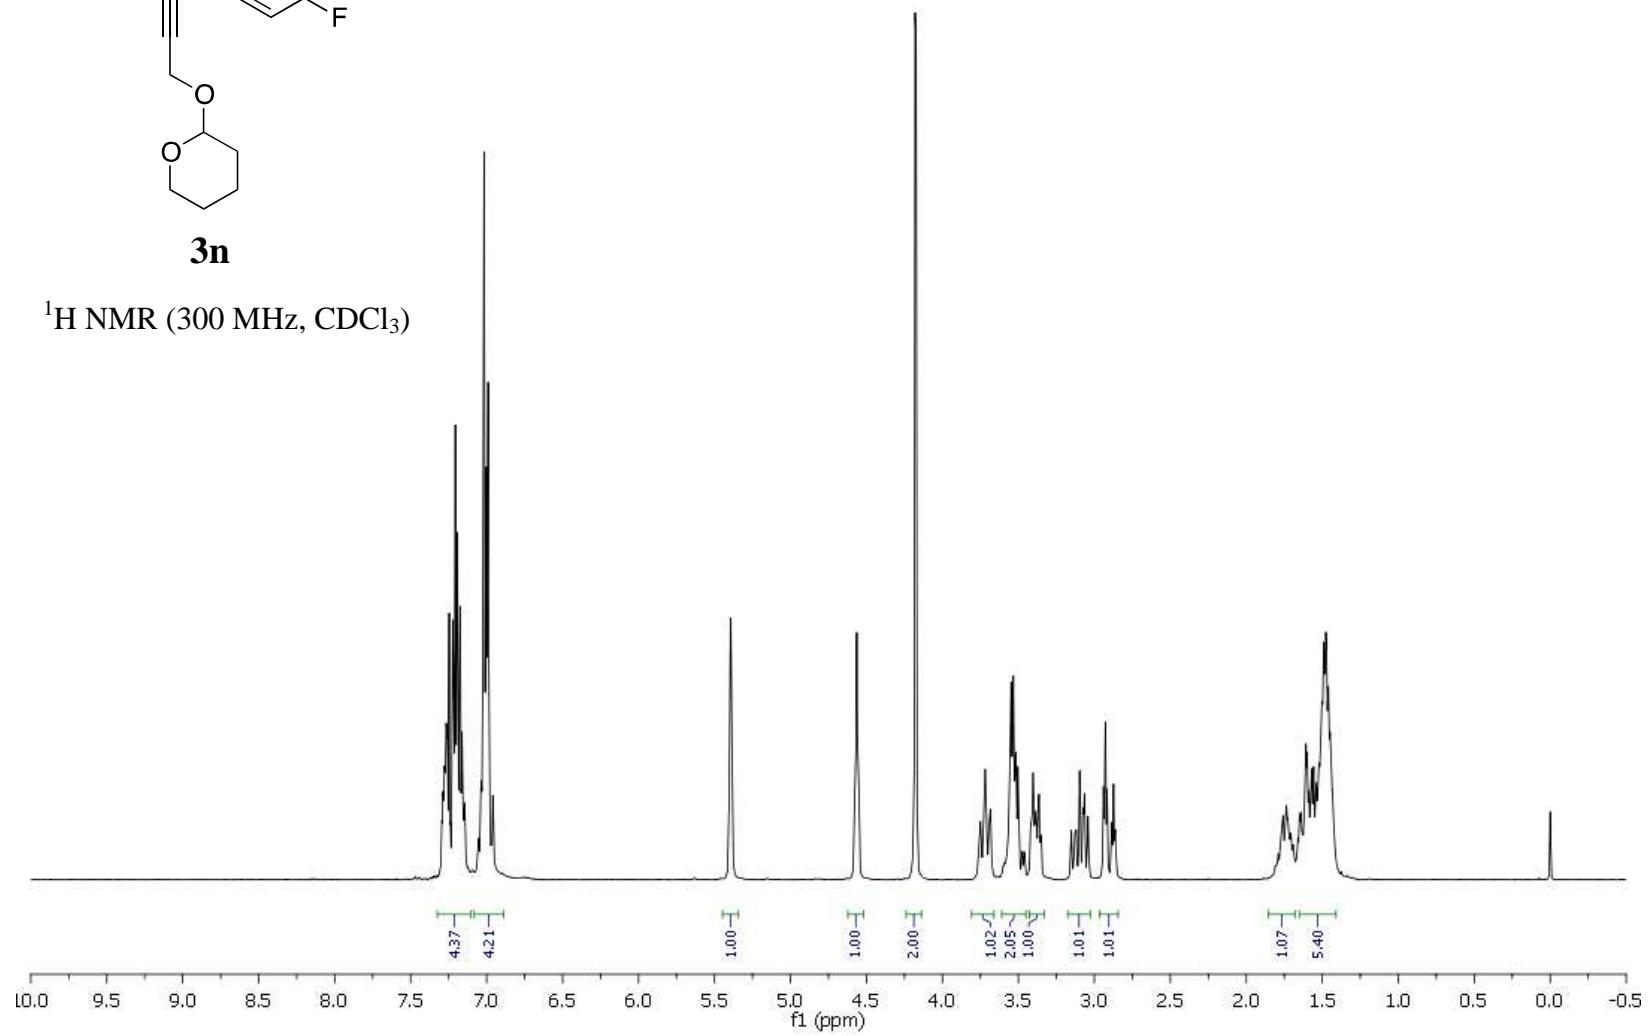

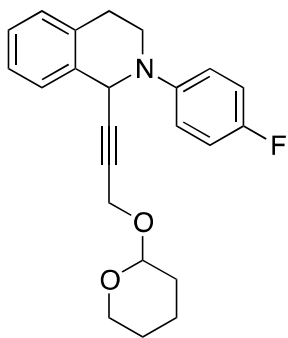

**3n**

$^{13}\text{C}$  NMR (75 MHz,  $\text{CDCl}_3$ )

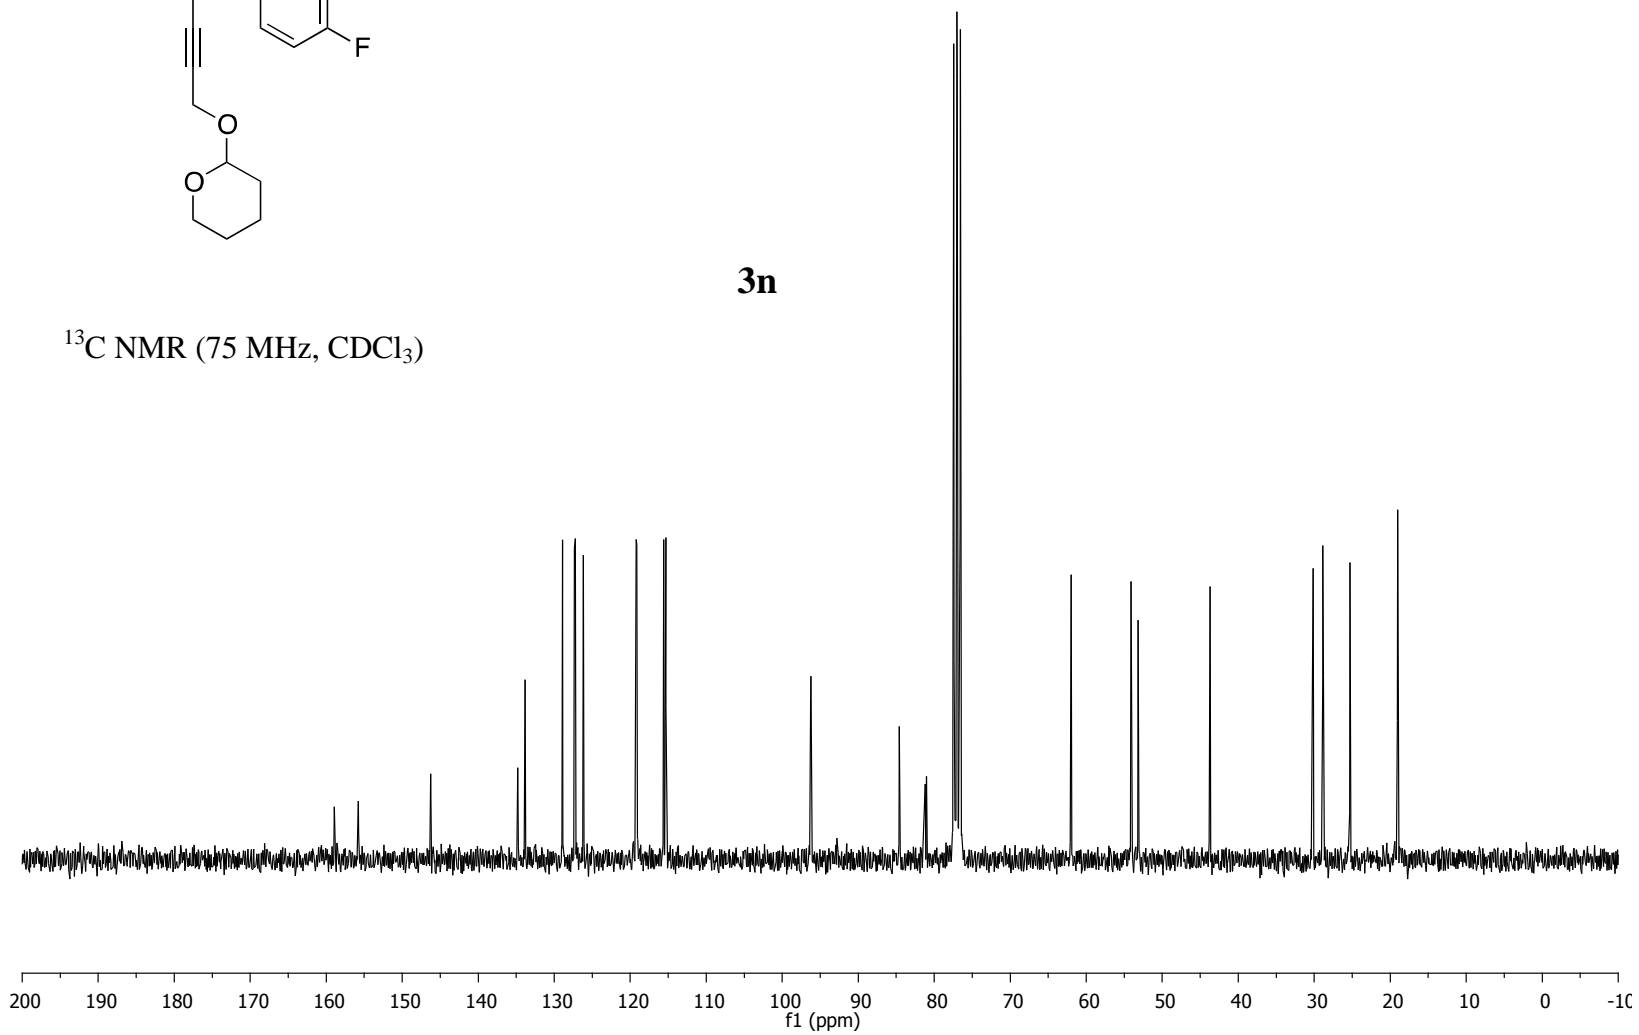



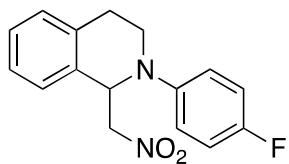

**3o**

$^1\text{H}$  NMR (300 MHz,  $\text{CDCl}_3$ )

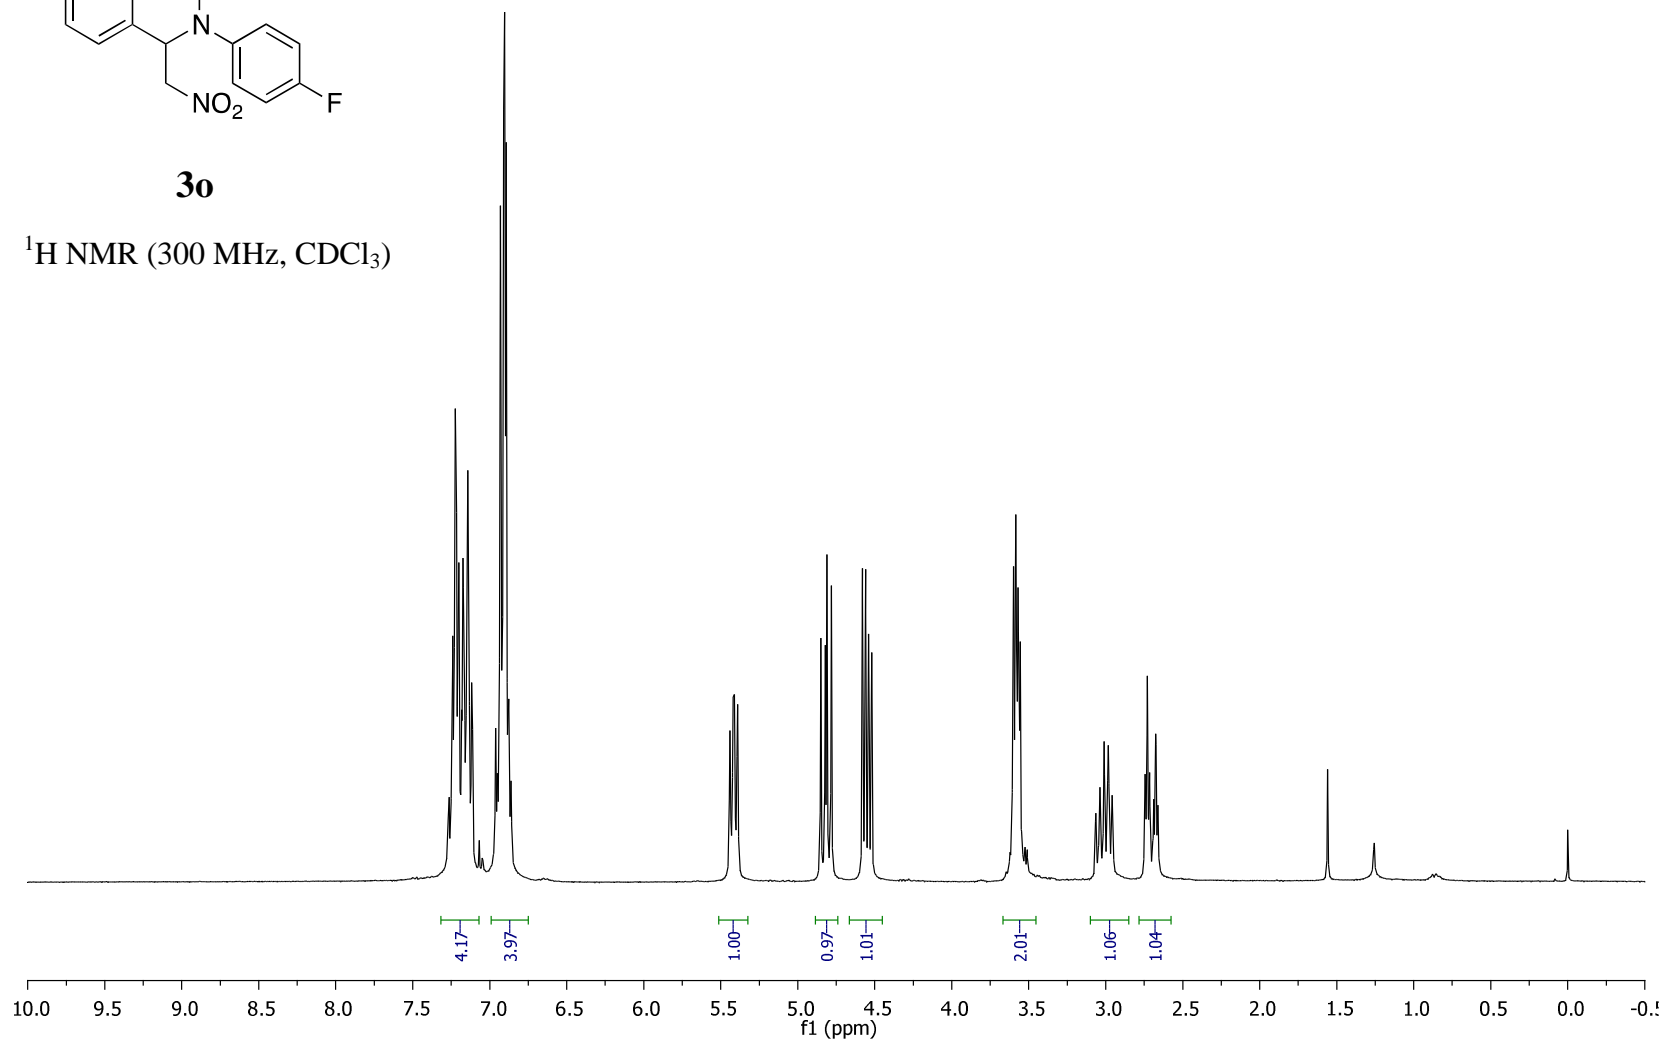

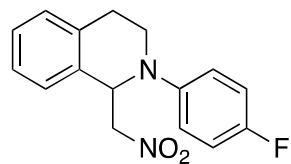

**3o**

<sup>13</sup>C NMR (75 MHz, CDCl<sub>3</sub>)

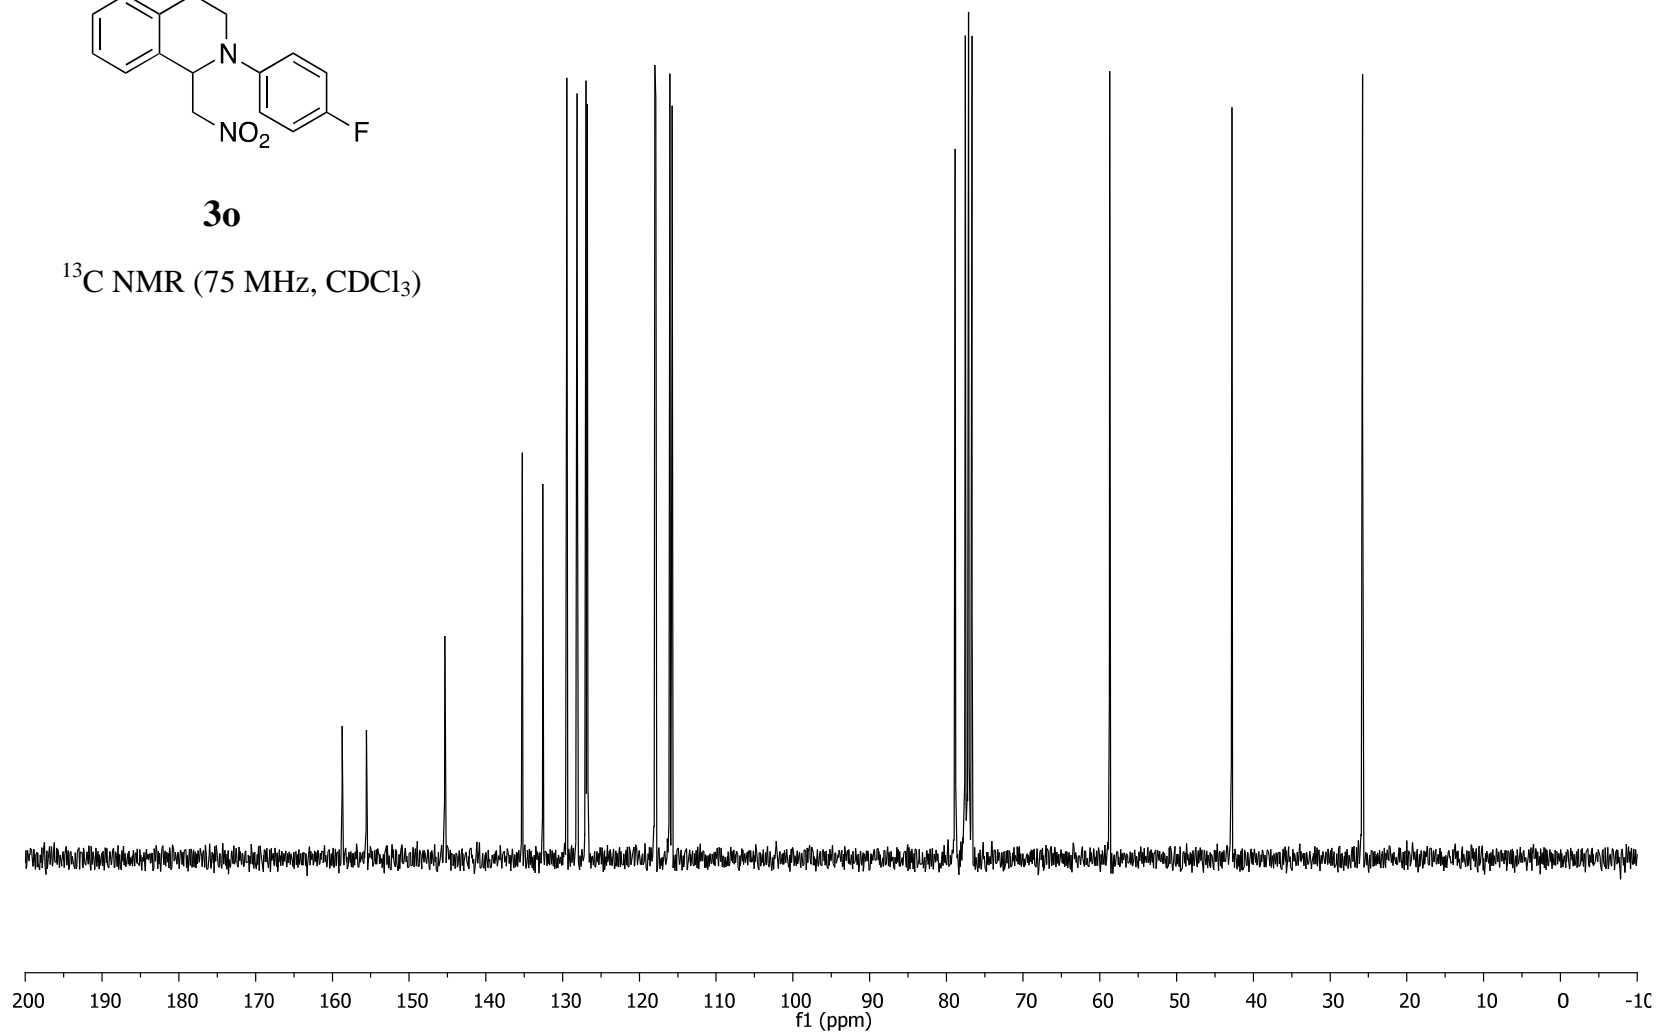

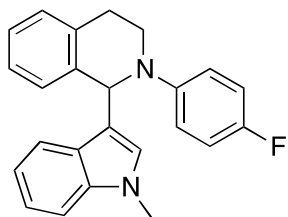

**3p**

$^1\text{H}$  NMR (300 MHz,  $\text{CDCl}_3$ )

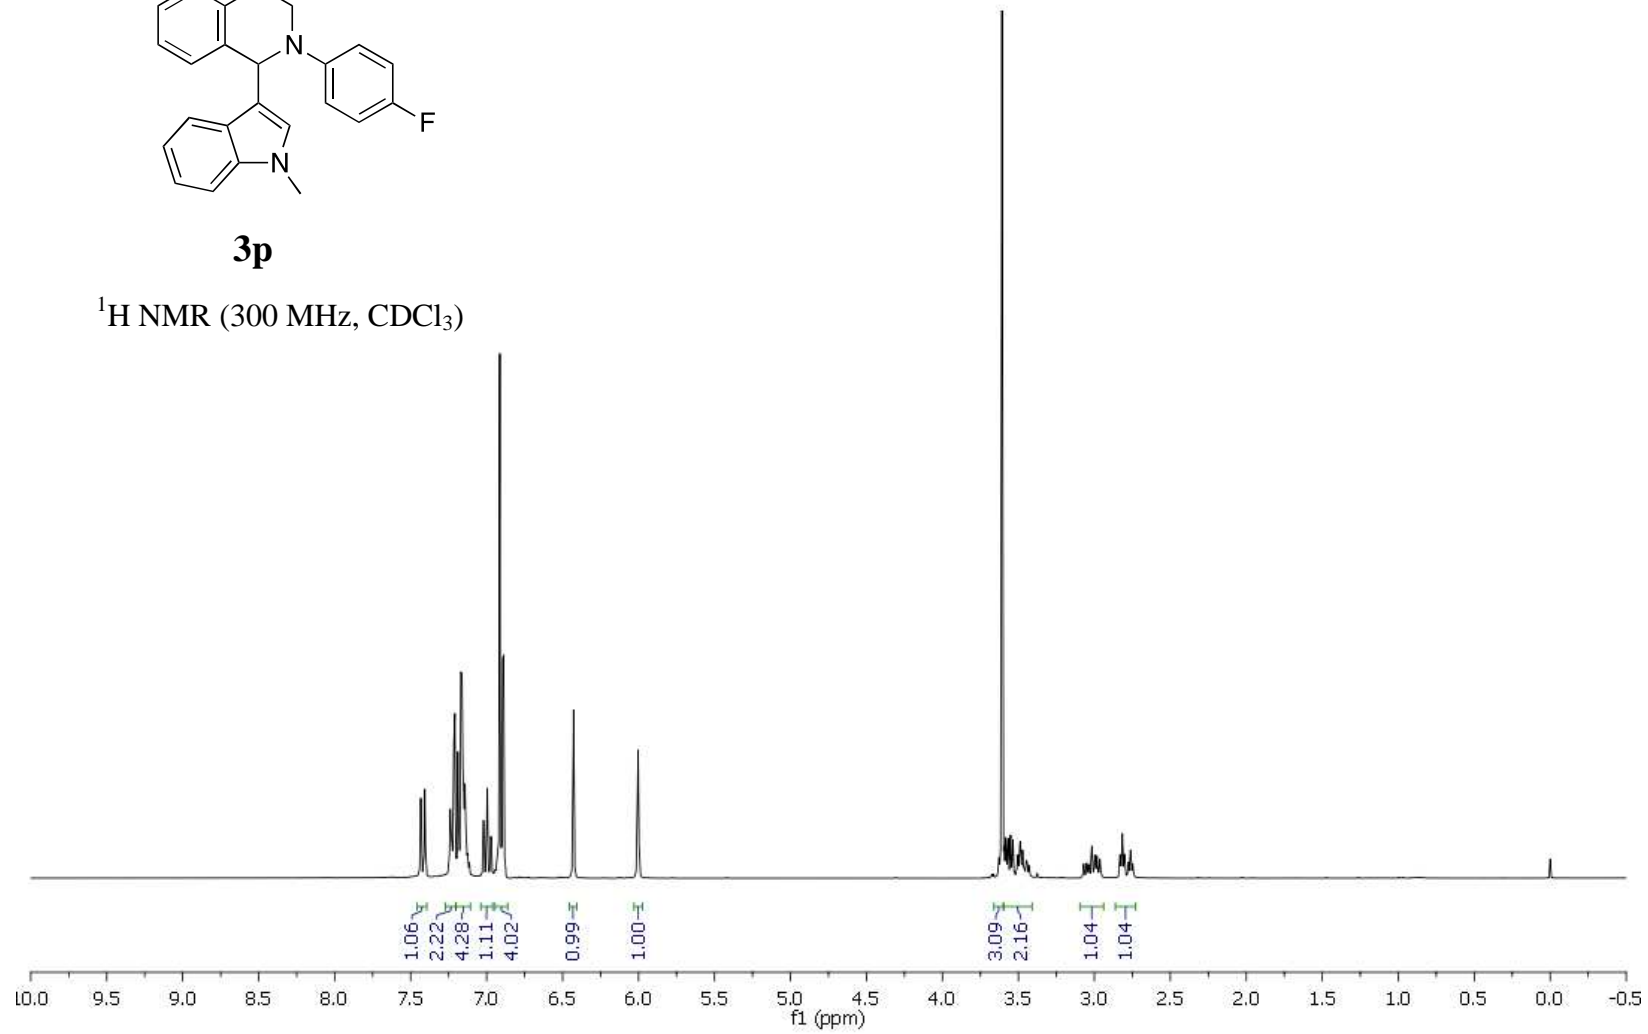

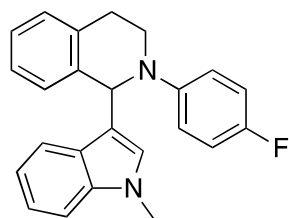

**3p**

$^{13}\text{C}$  NMR (75 MHz,  $\text{CDCl}_3$ )

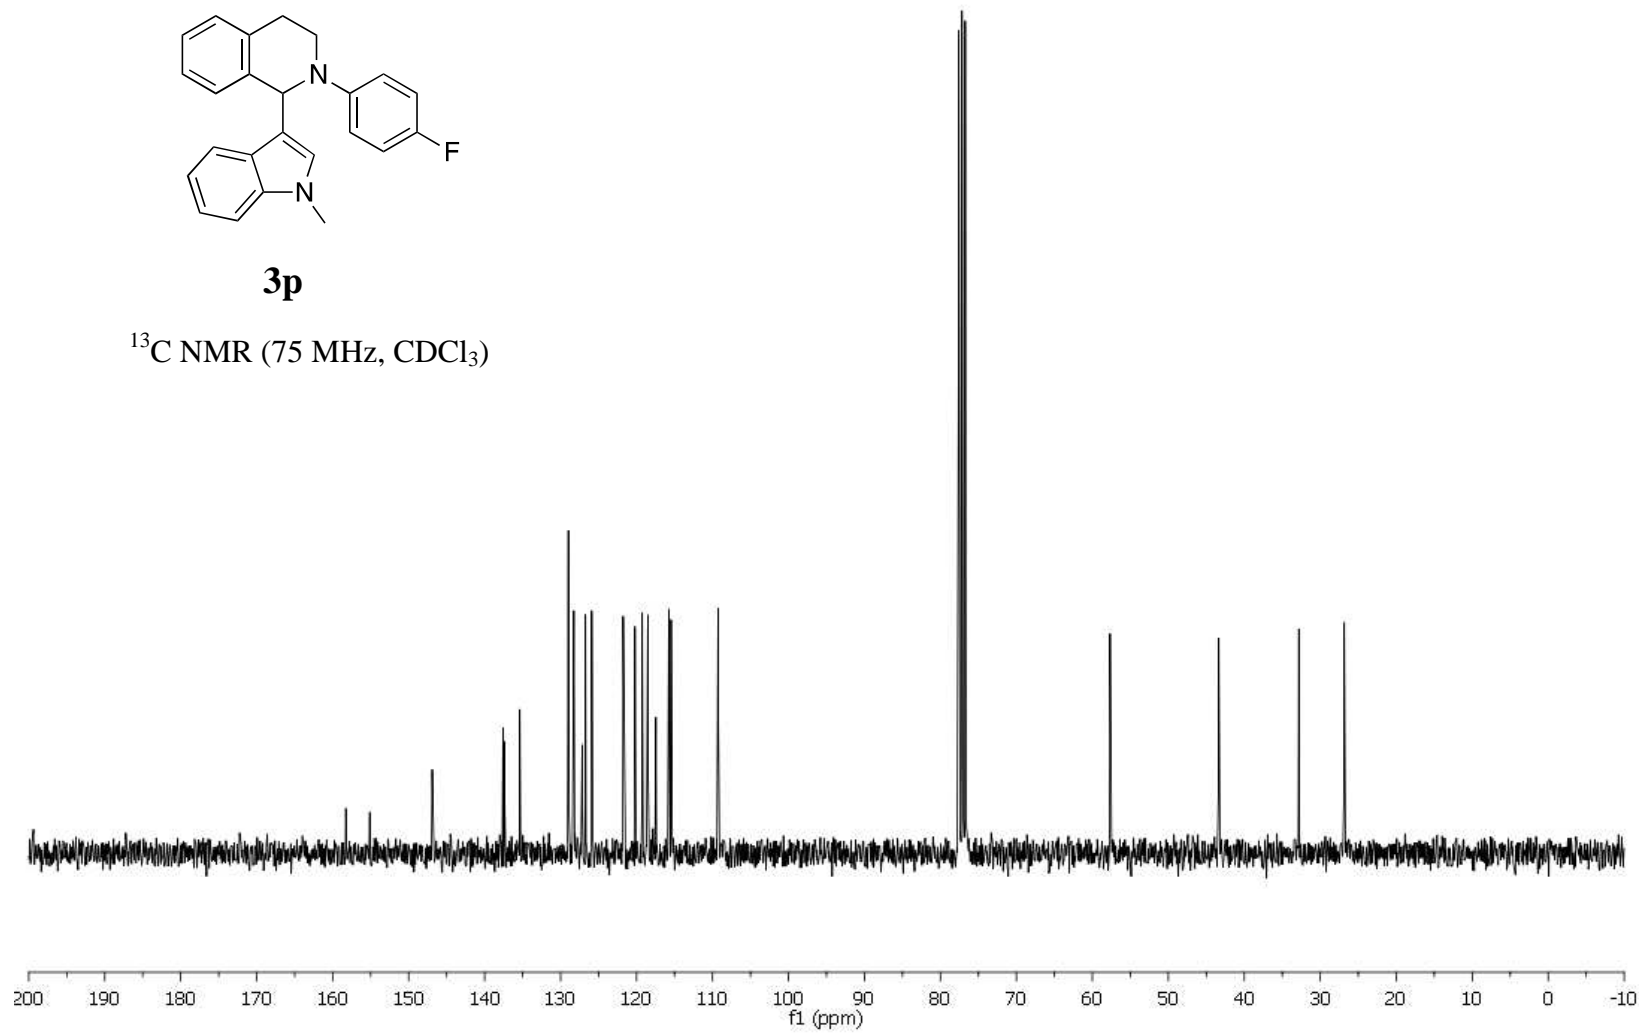

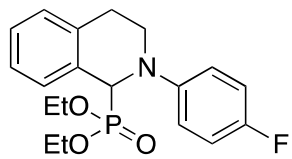

**3q**

$^1\text{H}$  NMR (300 MHz,  $\text{CDCl}_3$ )

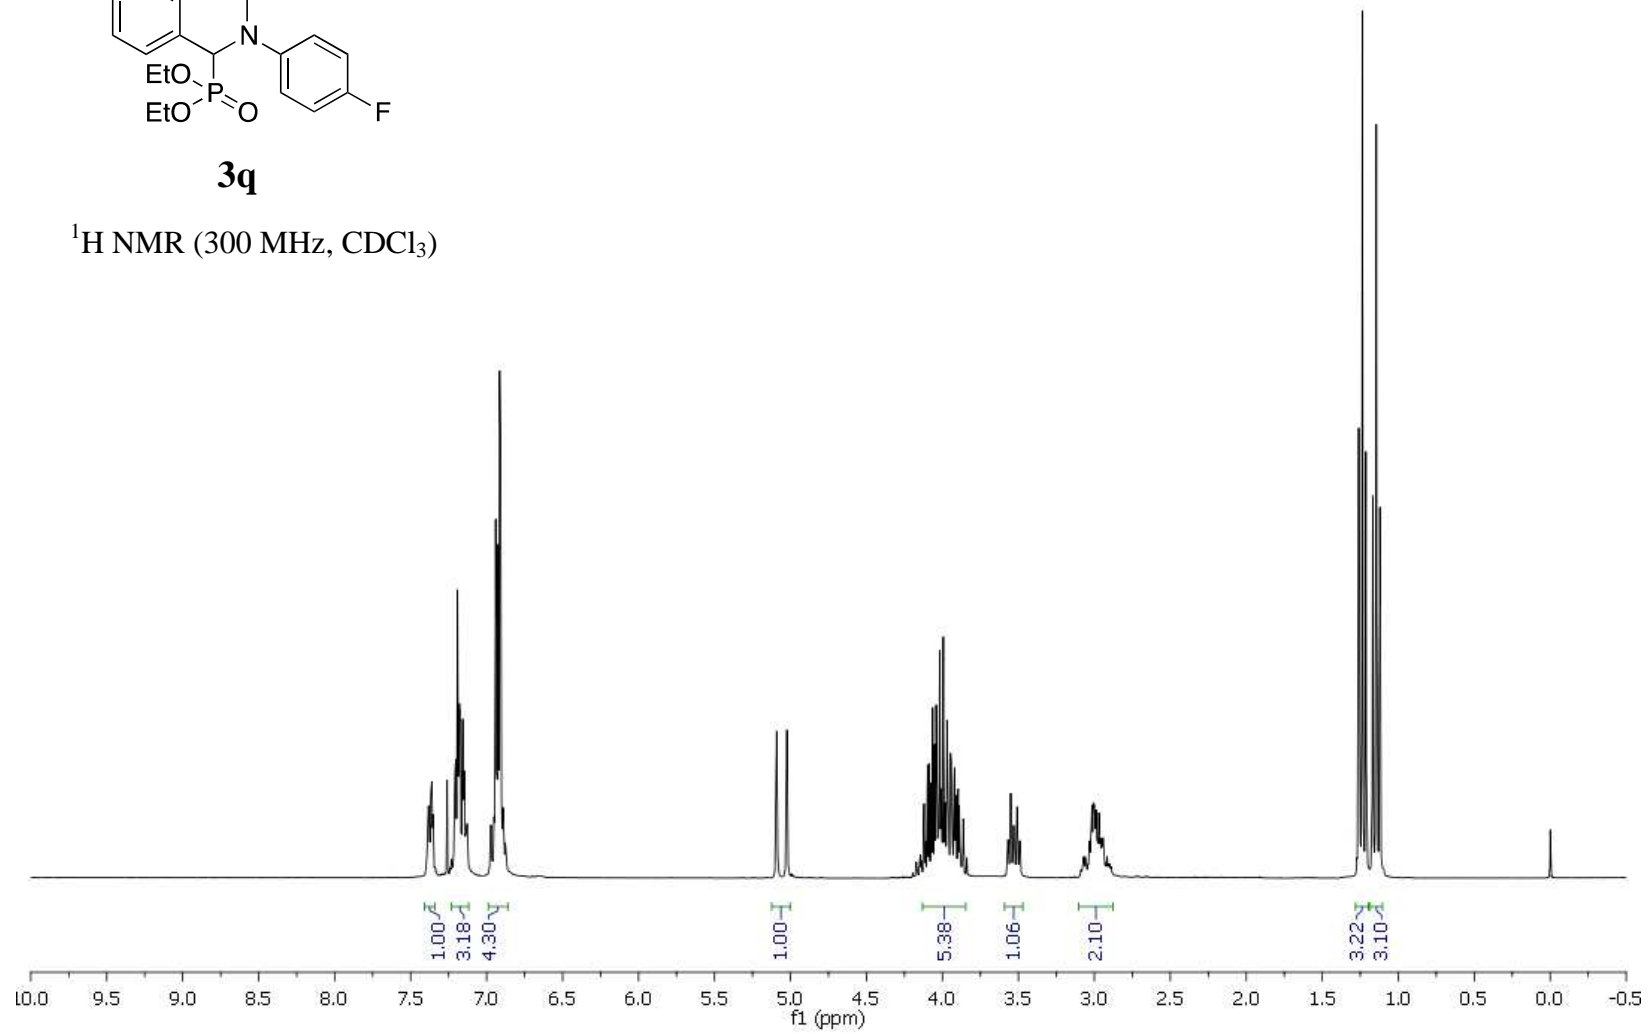

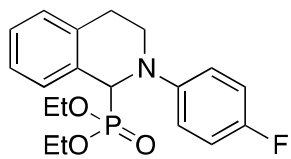

**3q**

$^{13}\text{C}$  NMR (75 MHz,  $\text{CDCl}_3$ )

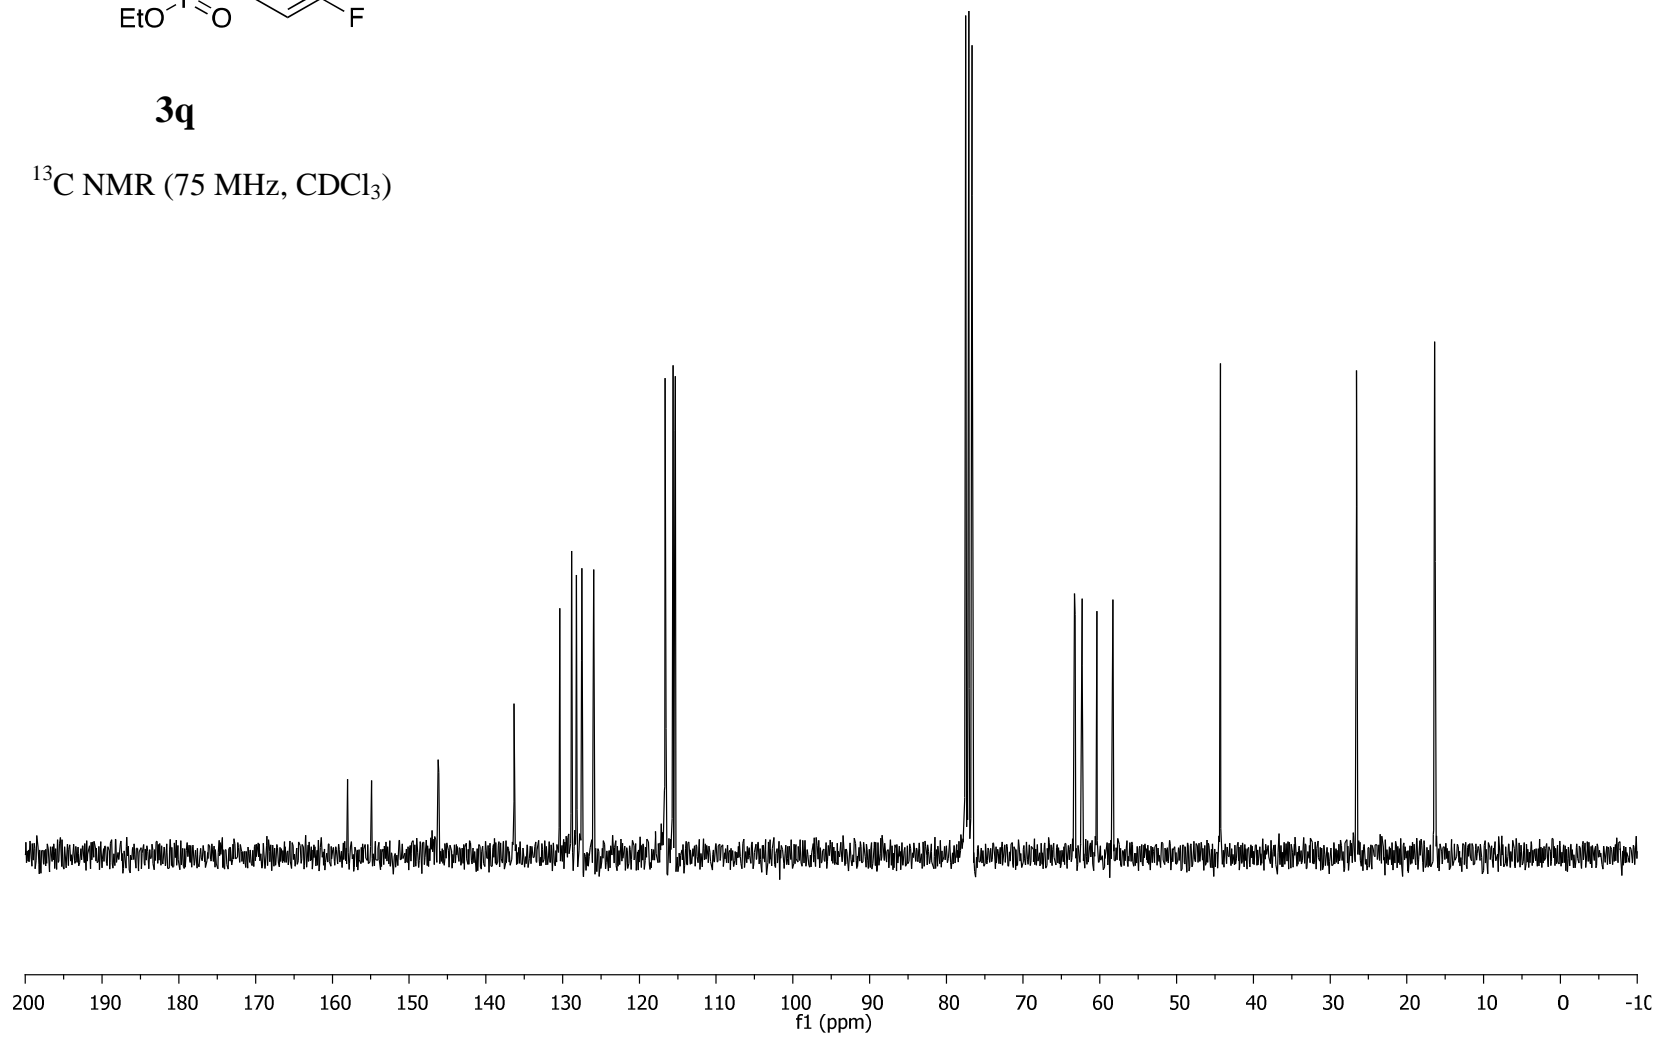

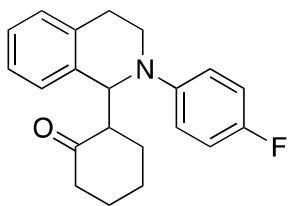

**3r**

<sup>1</sup>H NMR (300 MHz, CDCl<sub>3</sub>)

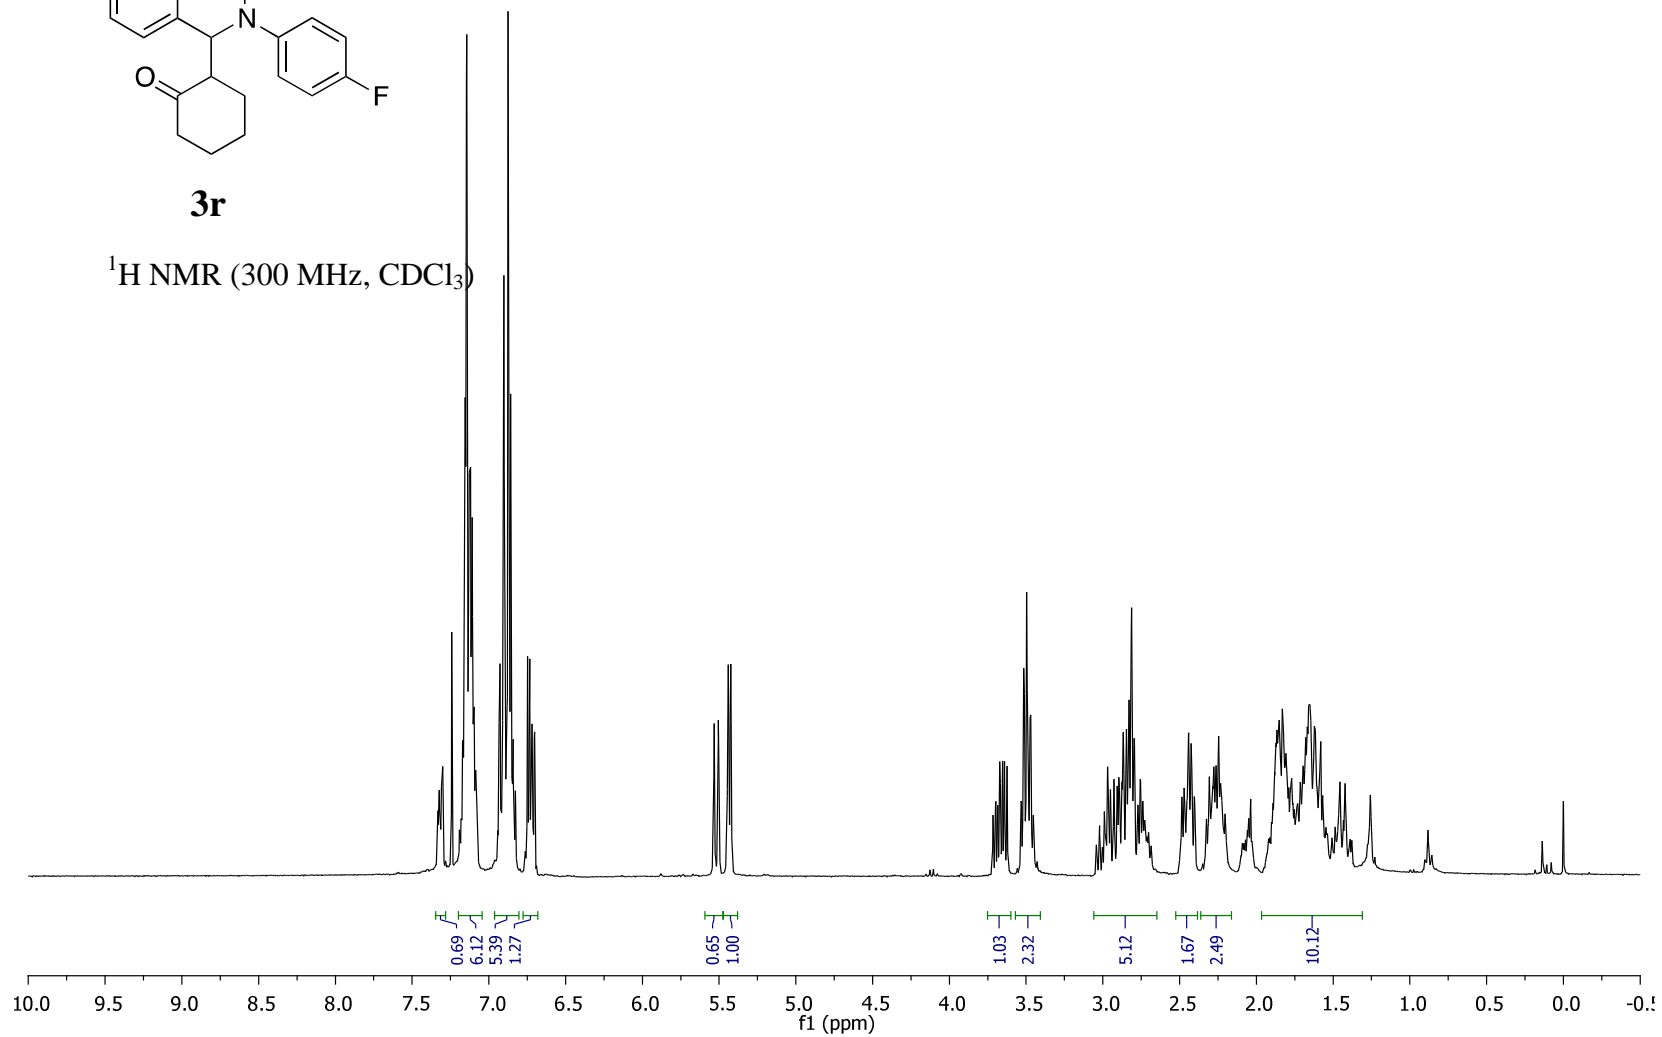

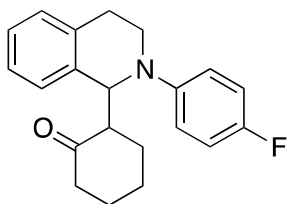

**3r**

$^{13}\text{C}$  NMR (75 MHz,  $\text{CDCl}_3$ )

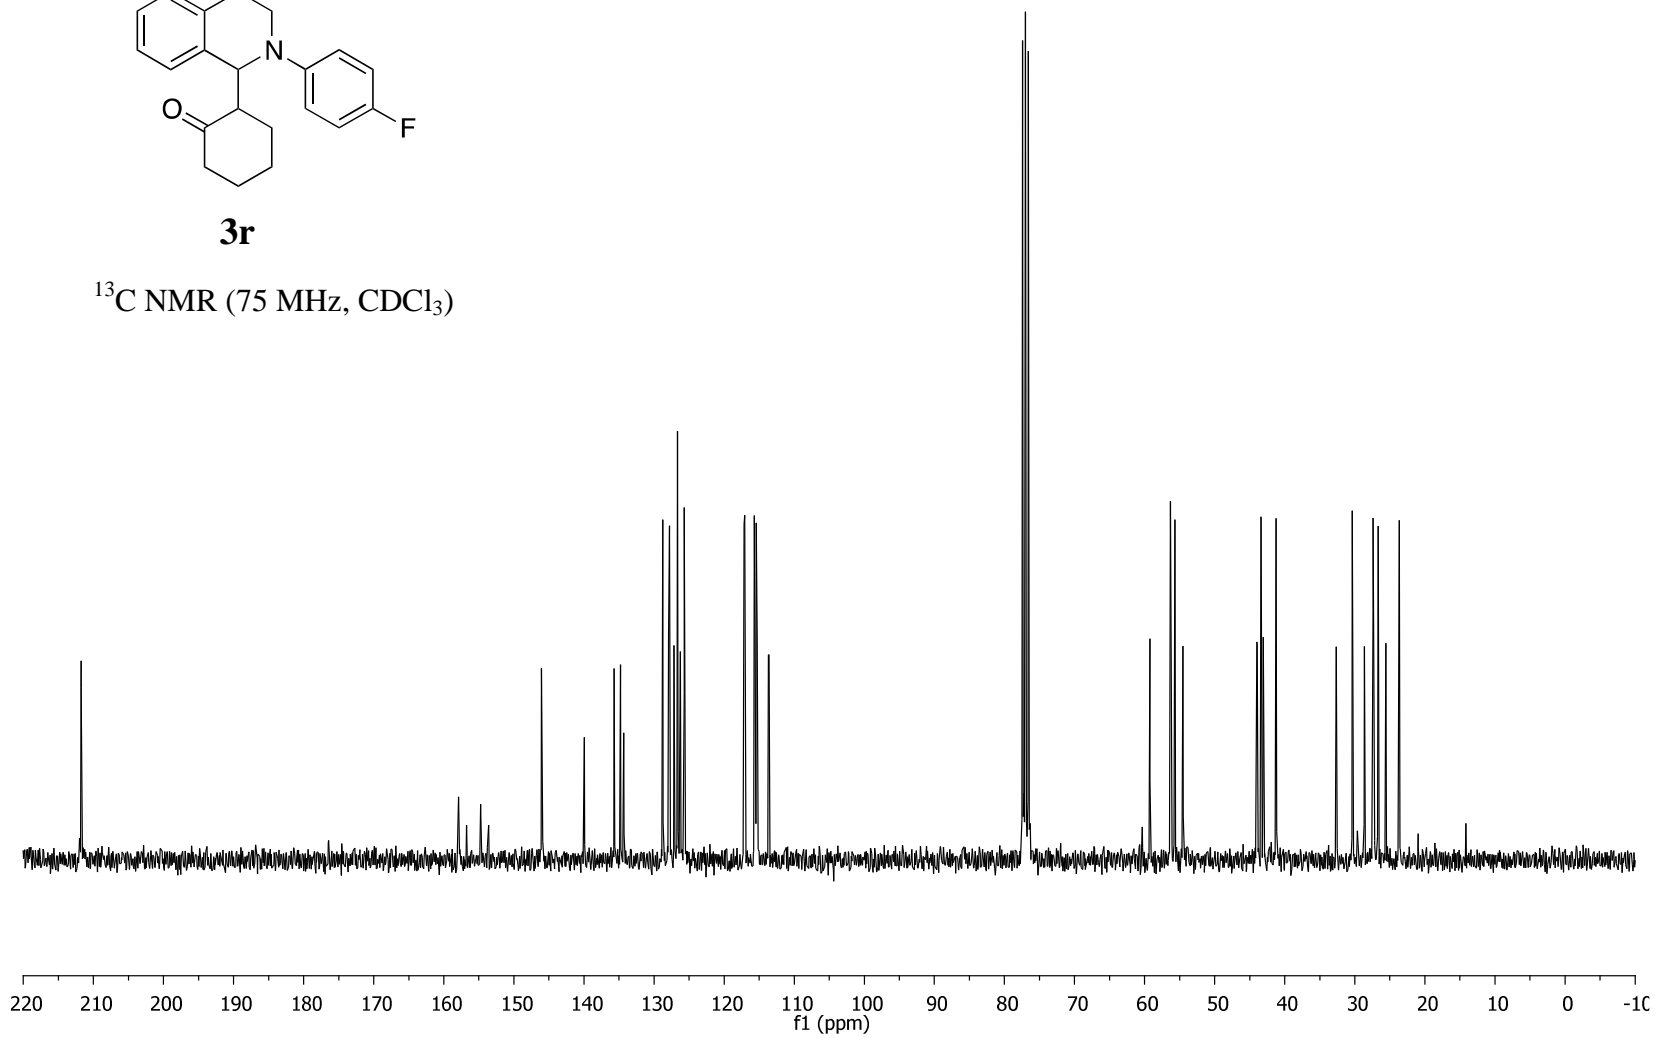



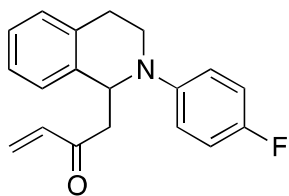

**3s**

$^1\text{H}$  NMR (300 MHz,  $\text{CDCl}_3$ )

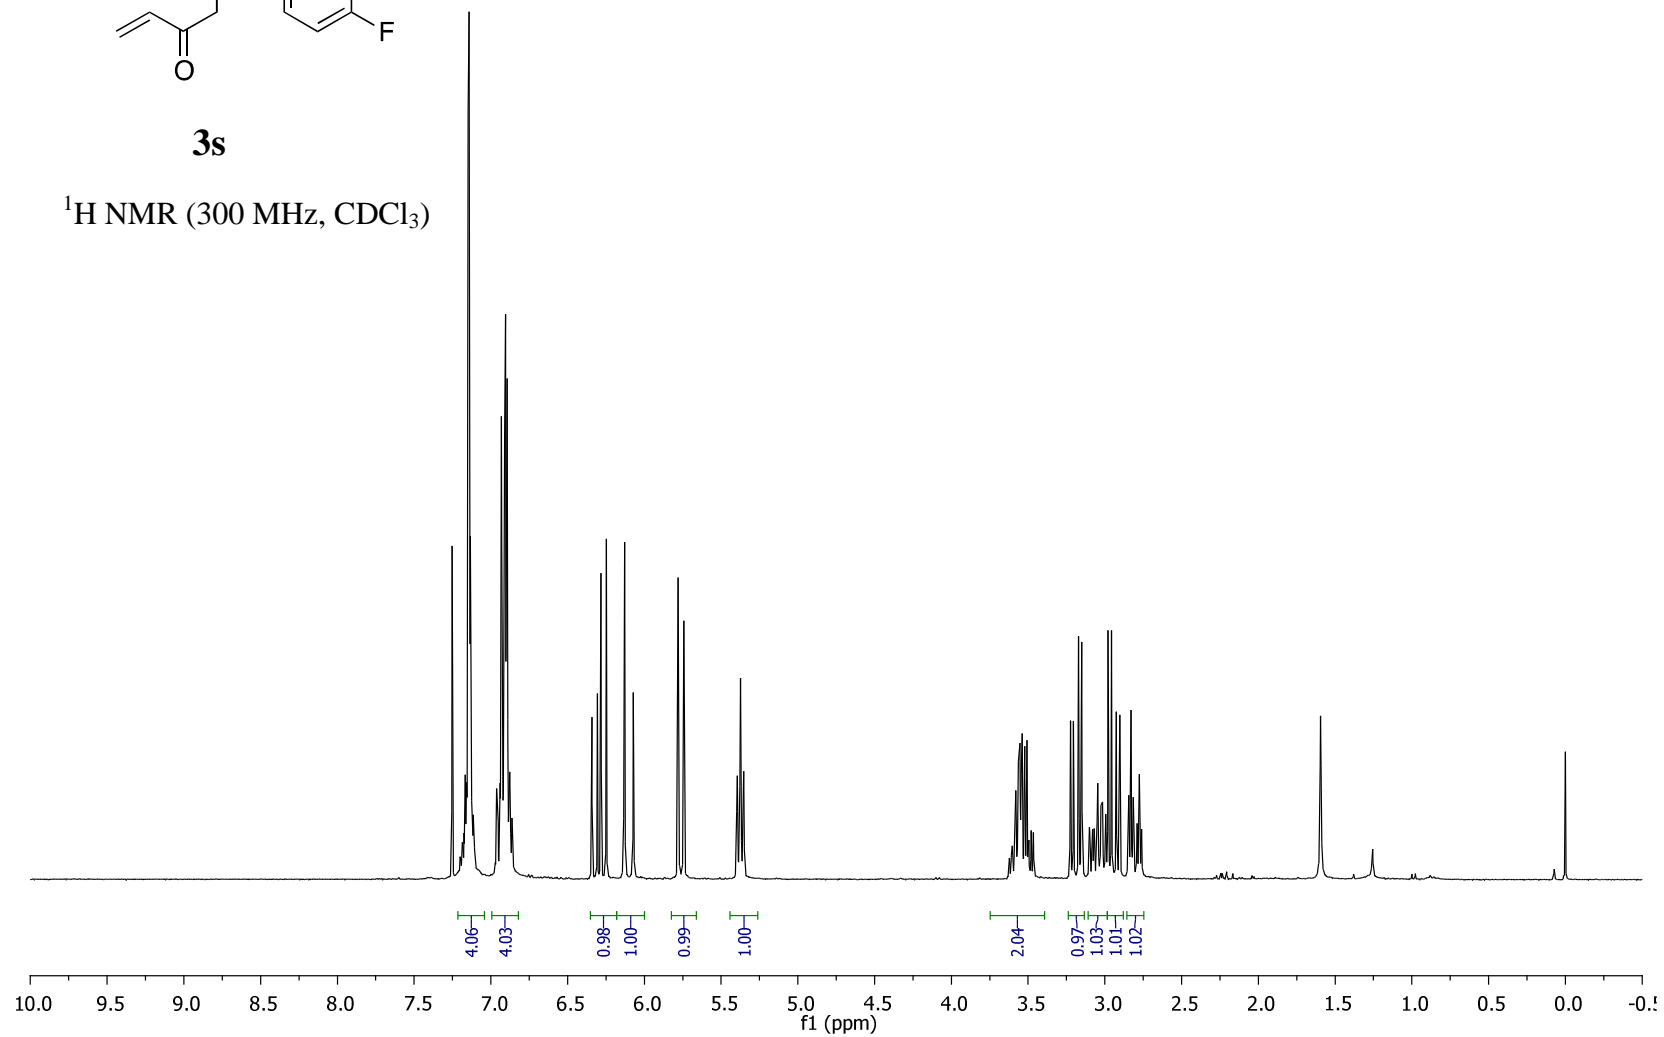

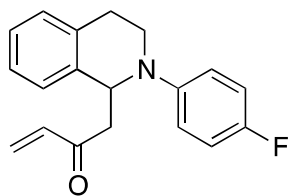

**3s**

$^{13}\text{C}$  NMR (75 MHz,  $\text{CDCl}_3$ )

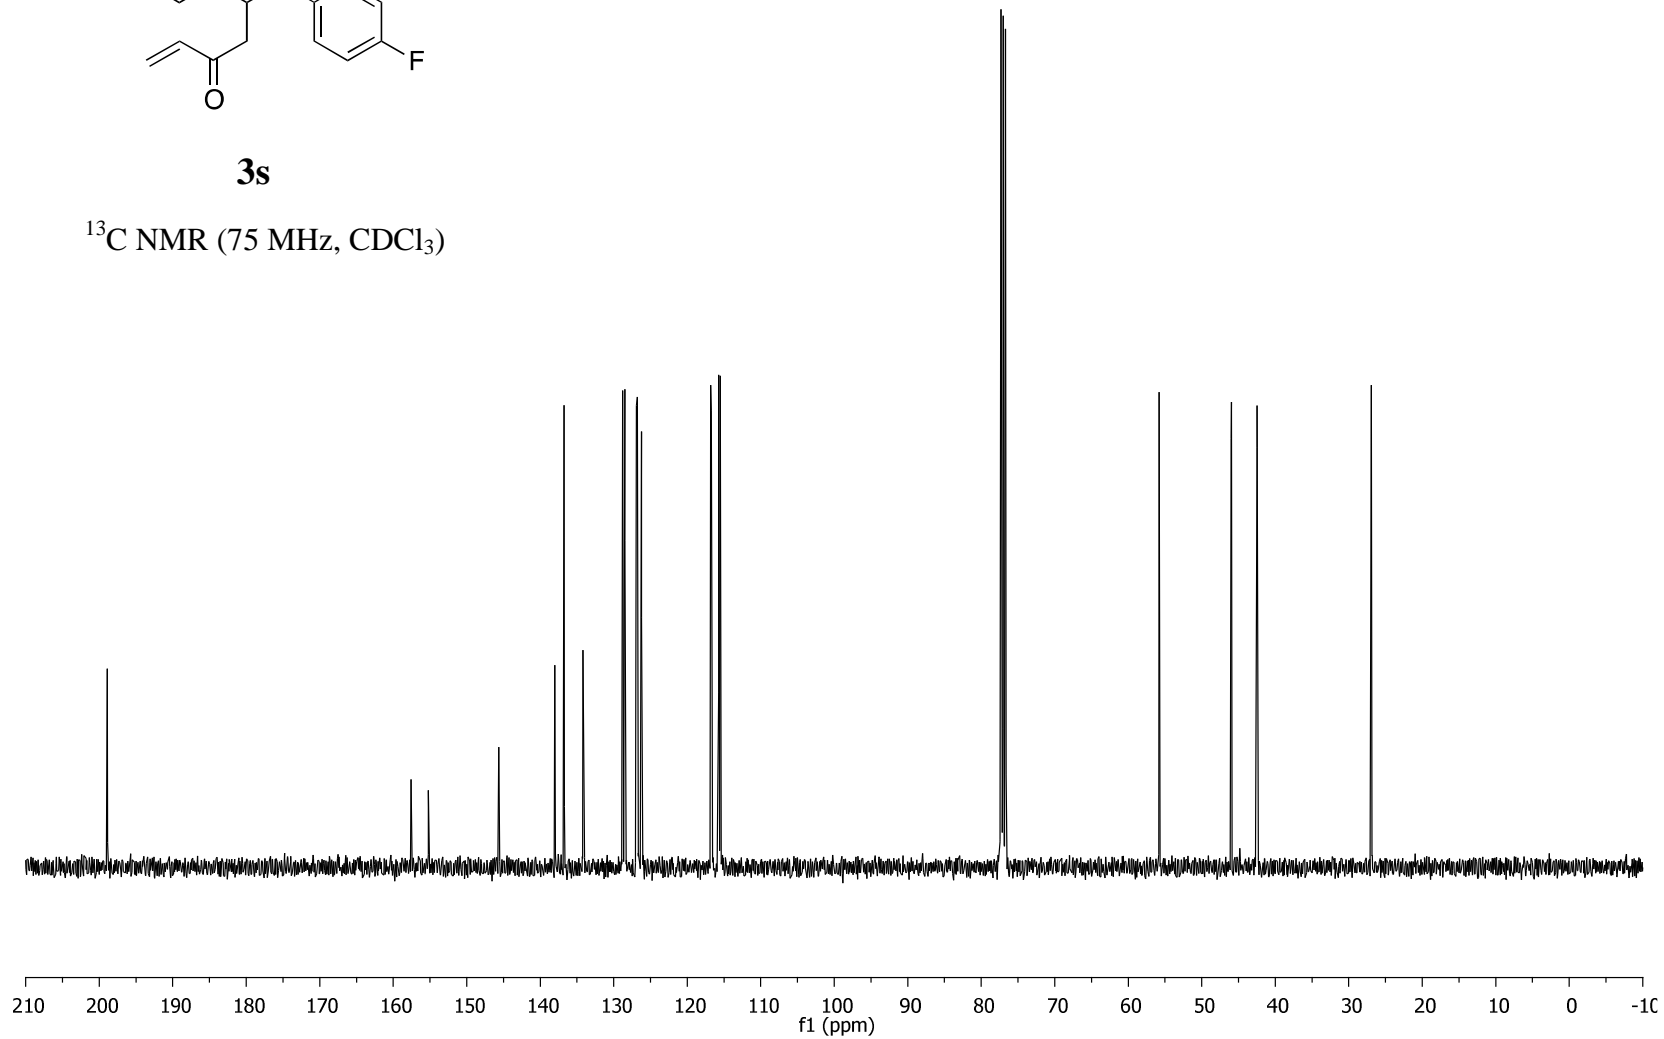

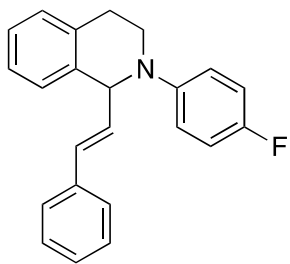

**3t**

$^1\text{H}$  NMR (300 MHz,  $\text{CDCl}_3$ )

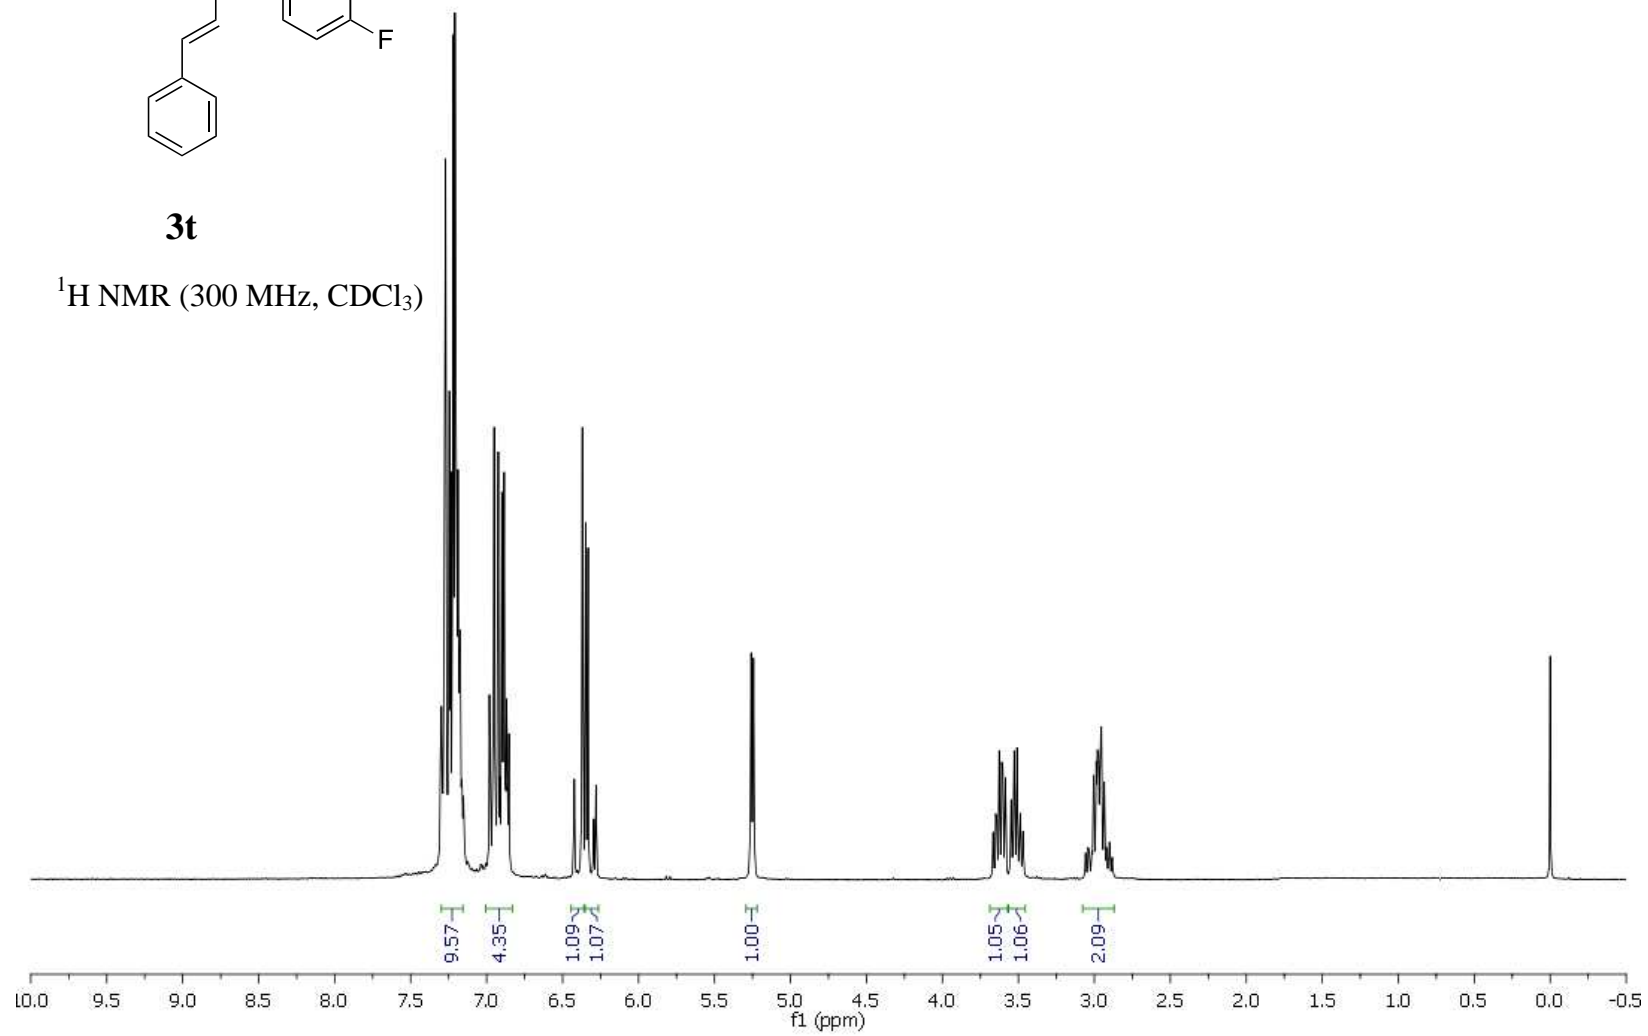

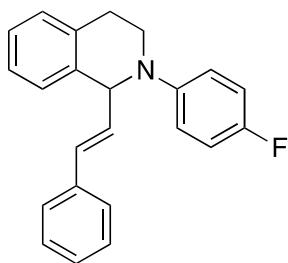

**3t**

$^{13}\text{C}$  NMR (75 MHz,  $\text{CDCl}_3$ )

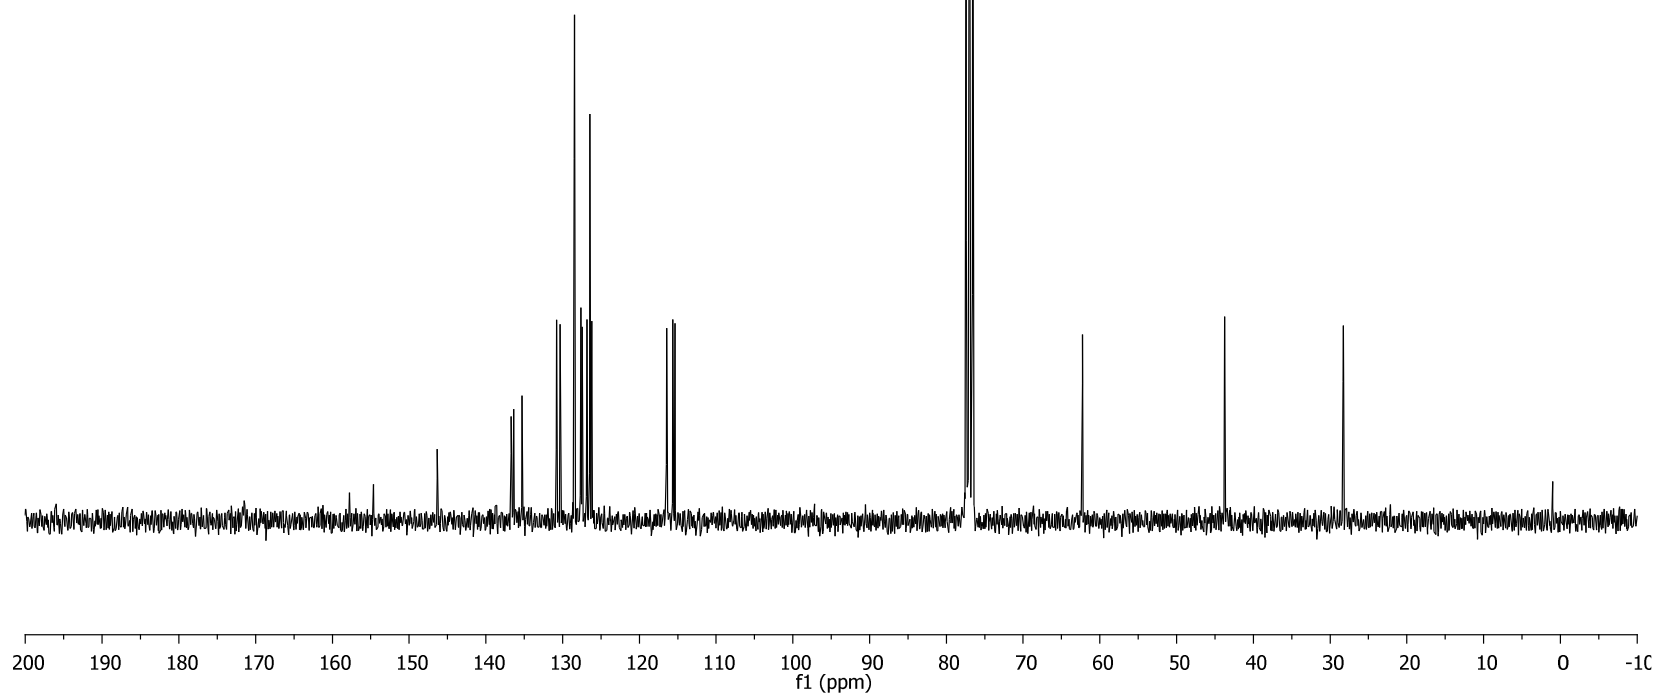

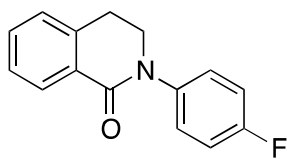

**4a**

$^1\text{H}$  NMR (300 MHz,  $\text{CDCl}_3$ )

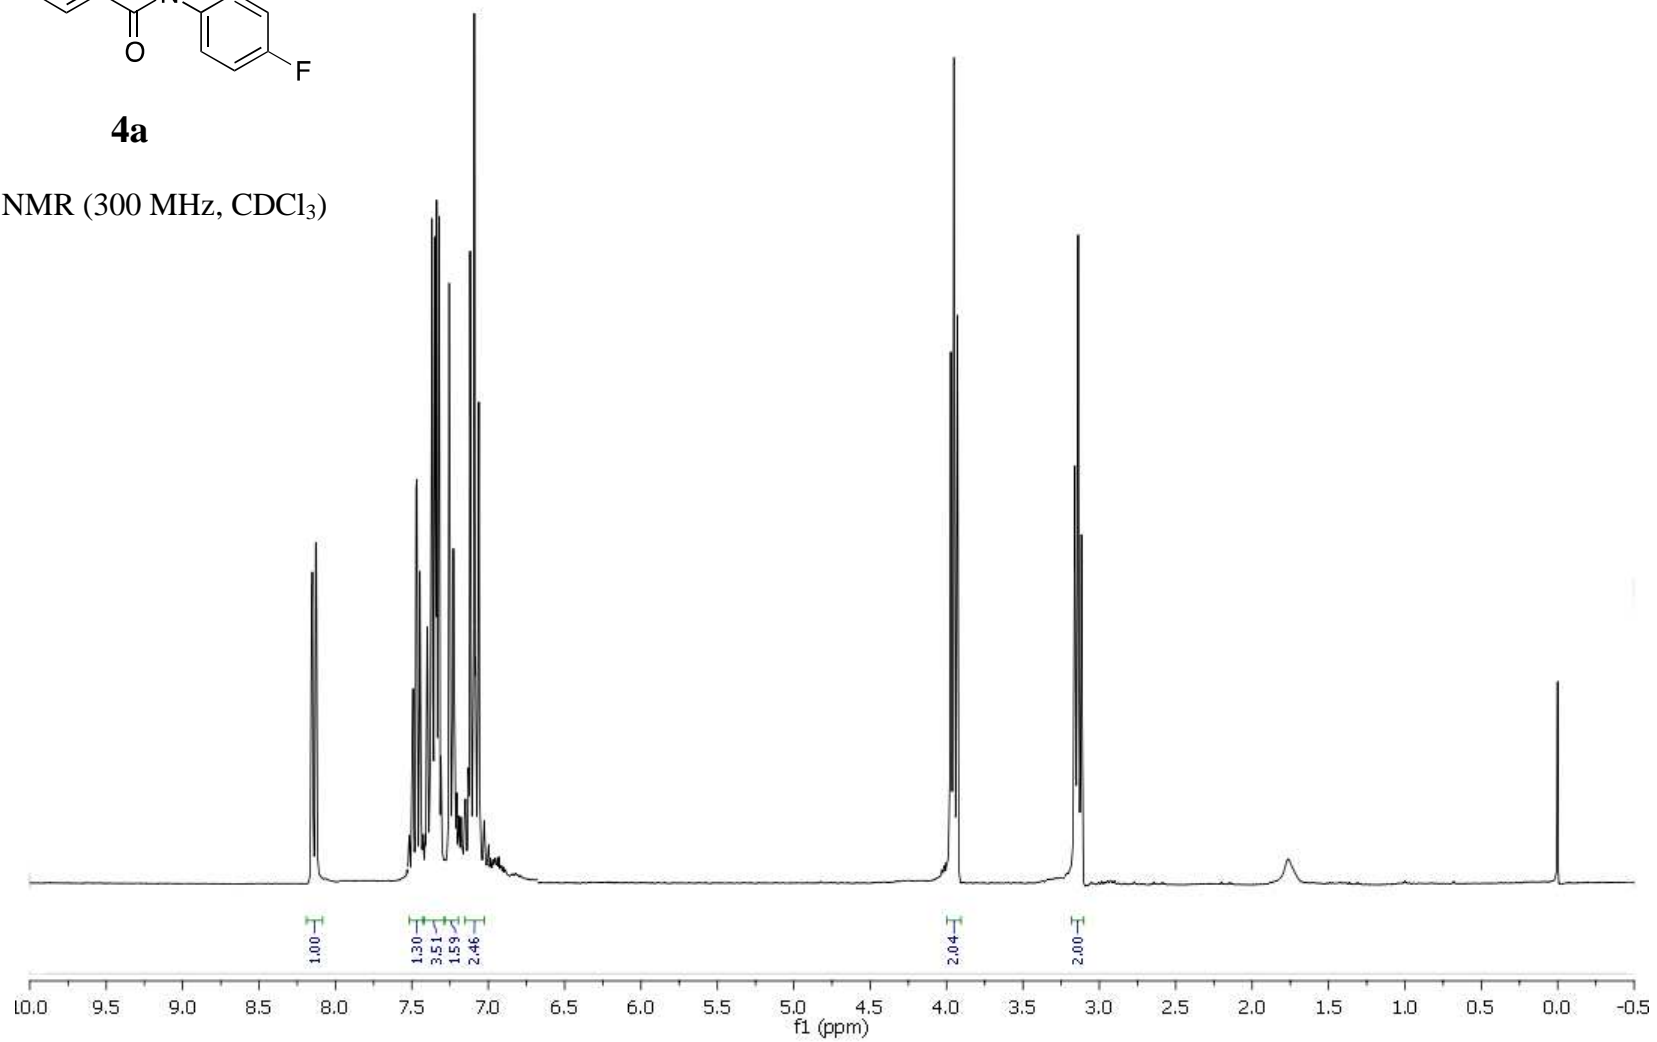

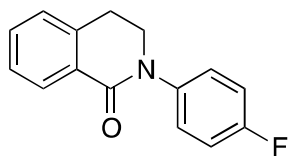

**4a**

$^{13}\text{C}$  NMR (75 MHz,  $\text{CDCl}_3$ )

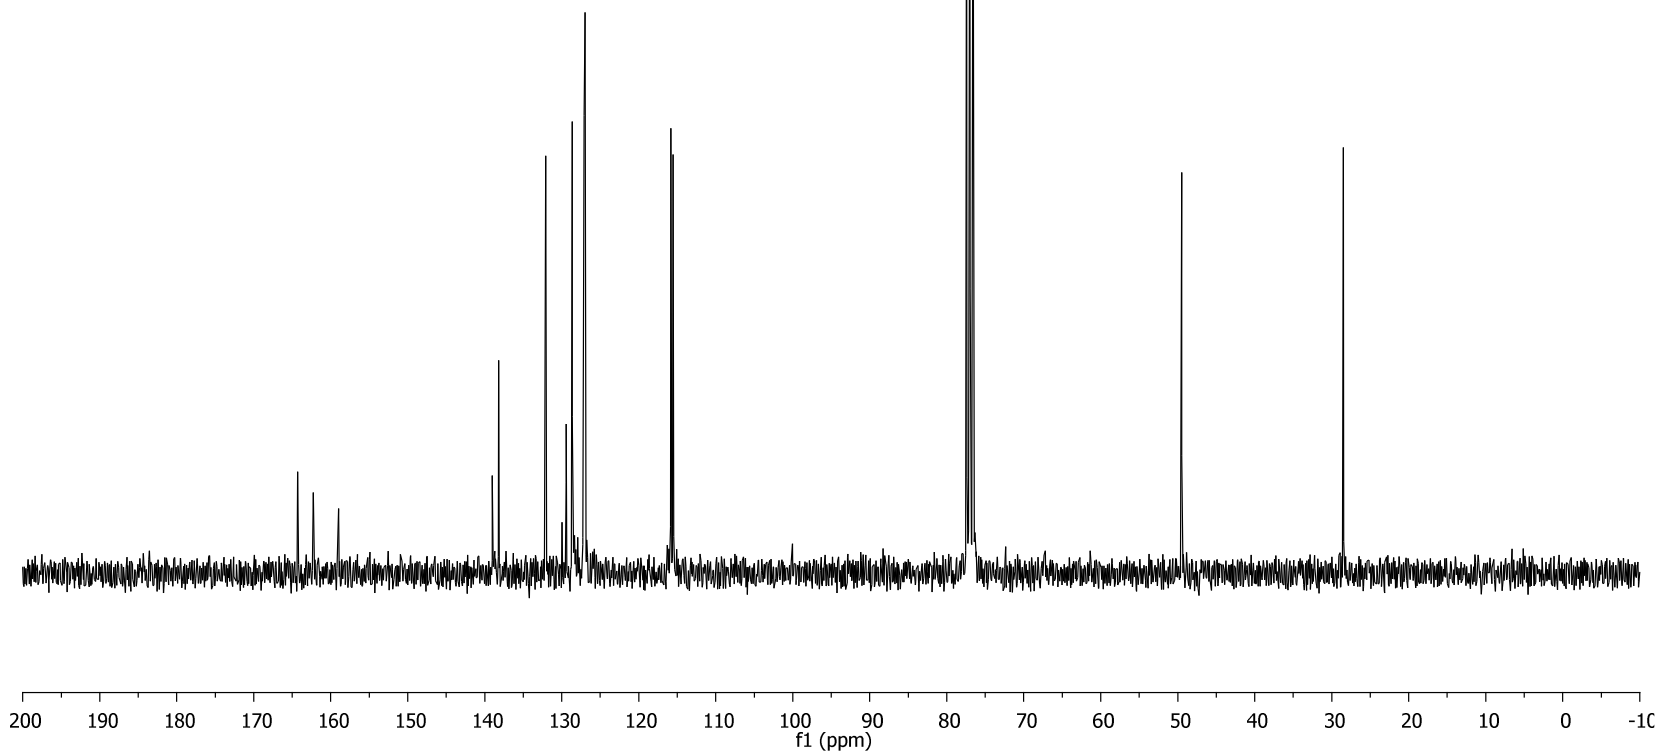

Supplement: c5gc01745a1.pdf [file c5gc01745a1.pdf]
